# Supplementary material for: Lin28a/let-7 pathway modulates the Hox code via Polycomb regulation during axial patterning in vertebrates
Source: eLife. 2020 May 29;9:e53608. doi: 10.7554/eLife.53608 (PMC7259951; doi:10.7554/eLife.53608)
Supplement: Figure 2—source data 1. [file elife-53608-fig2-data1.xlsx]

## Sheet: Hox qPCR
Sample Name	Detector Name	Ct	Detector Name	Ct	Ave(Hox)	Ave(b-actin)	dCT	ddCt			relative expression	Ave(relative)	SE	p-value
Wt1	Hoxa1	26.6682	b-actin	17.8043	26.6903	17.8755	8.81481	0	1	1.64866	0.606555	1	0.317863
Wt1	Hoxa1	26.7123	b-actin	17.9466
Wt2	Hoxa1	26.2045	b-actin	17.5461	26.0934	17.612	8.48136	-0.33345	1.26002		0.764273
Wt2	Hoxa1	25.9822	b-actin	17.6779
Wt3	Hoxa1	25.9611	b-actin	18.2344	25.9	18.5106	7.38938	-1.42543	2.68594		1.62917
Wt3	Hoxa1	25.8388	b-actin	18.7868
Lin28a-/- 1	Hoxa1	26.1612	b-actin	18.399	26.1856	18.2323	7.95327	-0.861541	1.81698		1.1021	1.91625	0.416763	0.155364
Lin28a-/- 1	Hoxa1	26.2099	b-actin	18.0657
Lin28a-/- 2	Hoxa1	25.5715	b-actin	18.4409	25.5533	18.5766	6.97676	-1.83805	3.57528		2.1686
Lin28a-/- 2	Hoxa1	25.5351	b-actin	18.7122
Lin28a-/- 3	Hoxa1	25.5467	b-actin	18.5283	25.6986	18.9143	6.78432	-2.0305	4.08545		2.47805
Lin28a-/- 3	Hoxa1	25.8505	b-actin	19.3003
Sample Name	Detector Name	Ct	Detector Name	Ct	Ave(Hox)	Ave(b-actin)	dCT	ddCt			relative expression	Ave(relative)	SE	p-value
Wt1	Hoxa2	25.2159	b-actin	17.8043	25.3318	17.8755	7.45634	0	1	1.56628	0.638456	1	0.232234
Wt1	Hoxa2	25.4477	b-actin	17.9466
Wt2	Hoxa2	24.5523	b-actin	17.5461	24.5284	17.612	6.9164	-0.539938	1.45391		0.928258
Wt2	Hoxa2	24.5045	b-actin	17.6779
Wt3	Hoxa2	24.7821	b-actin	18.2344	24.8003	18.5106	6.28967	-1.16667	2.24492		1.43329
Wt3	Hoxa2	24.8184	b-actin	18.7868
Lin28a-/- 1	Hoxa2	24.6213	b-actin	18.399	24.4482	18.2323	6.2159	-1.24045	2.36271		1.50849	2.54434	0.521746	0.0538615
Lin28a-/- 1	Hoxa2	24.2752	b-actin	18.0657
Lin28a-/- 2	Hoxa2	23.8225	b-actin	18.4409	23.8233	18.5766	5.24677	-2.20957	4.62537		2.9531
Lin28a-/- 2	Hoxa2	23.8241	b-actin	18.7122
Lin28a-/- 3	Hoxa2	23.8376	b-actin	18.5283	24.0582	18.9143	5.14387	-2.31247	4.96734		3.17143
Lin28a-/- 3	Hoxa2	24.2788	b-actin	19.3003
Sample Name	Detector Name	Ct	Detector Name	Ct	Ave(Hox)	Ave(b-actin)	dCT	ddCt			relative expression	Ave(relative)	SE	p-value
Wt1	Hoxa3	25.6768	b-actin	17.8043	25.5097	17.8755	7.63421	0	1	1.67563	0.596789	1	0.385453
Wt1	Hoxa3	25.3425	b-actin	17.9466
Wt2	Hoxa3	25.3147	b-actin	17.5461	25.1622	17.612	7.55018	-0.0840275	1.05997		0.632581
Wt2	Hoxa3	25.0096	b-actin	17.6779
Wt3	Hoxa3	24.813	b-actin	18.2344	24.5758	18.5106	6.06524	-1.56897	2.96693		1.77063
Wt3	Hoxa3	24.3386	b-actin	18.7868
Lin28a-/- 1	Hoxa3	23.7745	b-actin	18.399	23.7129	18.2323	5.48063	-2.15358	4.44931		2.6553	4.87673	1.16674	0.0343487
Lin28a-/- 1	Hoxa3	23.6514	b-actin	18.0657
Lin28a-/- 2	Hoxa3	22.9832	b-actin	18.4409	23.0415	18.5766	4.46491	-3.1693	8.99609		5.36877
Lin28a-/- 2	Hoxa3	23.0997	b-actin	18.7122
Lin28a-/- 3	Hoxa3	23.127	b-actin	18.5283	23.08	18.9143	4.1657	-3.46851	11.0694		6.60612
Lin28a-/- 3	Hoxa3	23.033	b-actin	19.3003
Sample Name	Detector Name	Ct	Detector Name	Ct	Ave(Hox)	Ave(b-actin)	dCT	ddCt			relative expression	Ave(relative)	SE	p-value
Wt1	Hoxa4	23.7981	b-actin	17.8043	23.7083	17.8755	5.83289	0	1	1.09888	0.910017	1	0.22551
Wt1	Hoxa4	23.6186	b-actin	17.9466
Wt2	Hoxa4	23.8466	b-actin	17.5461	23.9034	17.612	6.29141	0.45852	0.727732		0.662249
Wt2	Hoxa4	23.9602	b-actin	17.6779
Wt3	Hoxa4	23.7448	b-actin	18.2344	23.6937	18.5106	5.18313	-0.649762	1.56891		1.42773
Wt3	Hoxa4	23.6427	b-actin	18.7868
Lin28a-/- 1	Hoxa4	23.921	b-actin	18.399	24.046	18.2323	5.81364	-0.01925	1.01343		0.922241	1.55138	0.321797	0.233222
Lin28a-/- 1	Hoxa4	24.171	b-actin	18.0657
Lin28a-/- 2	Hoxa4	23.4775	b-actin	18.4409	23.4673	18.5766	4.89077	-0.942129	1.92136		1.74847
Lin28a-/- 2	Hoxa4	23.4571	b-actin	18.7122
Lin28a-/- 3	Hoxa4	23.5699	b-actin	18.5283	23.6232	18.9143	4.70887	-1.12402	2.17954		1.98342
Lin28a-/- 3	Hoxa4	23.6765	b-actin	19.3003
Sample Name	Detector Name	Ct	Detector Name	Ct	Ave(Hox)	Ave(b-actin)	dCT	ddCt			relative expression	Ave(relative)	SE	p-value
Wt1	Hoxa5	30.53	b-actin	17.8043	30.015	17.8755	12.1395	0	1	1.53614	0.650984	1	0.324389
Wt1	Hoxa5	29.5	b-actin	17.9466
Wt2	Hoxa5	29.94	b-actin	17.5461	29.645	17.612	12.033	-0.106541	1.07664		0.700878
Wt2	Hoxa5	29.35	b-actin	17.6779
Wt3	Hoxa5	29.15	b-actin	18.2344	29.31	18.5106	10.7994	-1.34014	2.53177		1.64814
Wt3	Hoxa5	29.47	b-actin	18.7868
Lin28a-/- 1	Hoxa5	29.14	b-actin	18.399	29.42	18.2323	11.1877	-0.951869	1.93438		1.25925	2.14058	0.546892	0.147304
Lin28a-/- 1	Hoxa5	29.7	b-actin	18.0657
Lin28a-/- 2	Hoxa5	28.69	b-actin	18.4409	28.445	18.5766	9.86845	-2.2711	4.82691		3.14224
Lin28a-/- 2	Hoxa5	28.2	b-actin	18.7122
Lin28a-/- 3	Hoxa5	29.7	b-actin	18.5283	29.42	18.9143	10.5057	-1.63385	3.1034		2.02026
Lin28a-/- 3	Hoxa5	29.14	b-actin	19.3003
Sample Name	Detector Name	Ct	Detector Name	Ct	Ave(Hox)	Ave(b-actin)	dCT	ddCt			relative expression	Ave(relative)	SE	p-value
Wt1	Hoxa6	27.04	b-actin	17.8043	26.65	17.8755	8.77455	0	1	0.986851	1.01332	1	0.0370478
Wt1	Hoxa6	26.26	b-actin	17.9466
Wt2	Hoxa6	26.48	b-actin	17.5461	26.51	17.612	8.89801	0.123459	0.917984		0.930215
Wt2	Hoxa6	26.54	b-actin	17.6779
Wt3	Hoxa6	27.35	b-actin	18.2344	27.225	18.5106	8.71441	-0.0601435	1.04257		1.05646
Wt3	Hoxa6	27.1	b-actin	18.7868
Lin28a-/- 1	Hoxa6	26.53	b-actin	18.399	26.54	18.2323	8.30768	-0.466869	1.38211		1.40052	2.1049	0.704374	0.127067
Lin28a-/- 1	Hoxa6	26.55	b-actin	18.0657
Lin28a-/- 2	Hoxa6	25.87	b-actin	18.4409	25.88	18.5766	7.30345	-1.4711	2.77233		2.80927
Lin28a-/- 2	Hoxa6	25.89	b-actin	18.7122
Lin28a-/- 3	Hoxa6	26.71	b-actin	18.5283	26.69	18.9143	7.7757	-0.998848	1.9984		2.02503
Lin28a-/- 3	Hoxa6	26.67	b-actin	19.3003
Sample Name	Detector Name	Ct	Detector Name	Ct	Ave(Hox)	Ave(b-actin)	dCT	ddCt			relative expression	Ave(relative)	SE	p-value
Wt1	Hoxa7	29.56	b-actin	17.8043	29.56	17.8755	11.6845	0	1	2.37681	0.420732	1	0.392523
Wt1	Hoxa7	29.56	b-actin	17.9466
Wt2	Hoxa7	28.26	b-actin	17.5461	28.315	17.612	10.703	-0.981541	1.97457		0.830767
Wt2	Hoxa7	28.37	b-actin	17.6779
Wt3	Hoxa7	28.12	b-actin	18.2344	28.14	18.5106	9.62941	-2.05514	4.15585		1.7485
Wt3	Hoxa7	28.16	b-actin	18.7868
Lin28a-/- 1	Hoxa7	28.6	b-actin	18.399	28.525	18.2323	10.2927	-1.39187	2.62418		1.10408	1.22663	0.122547	0.689626
Lin28a-/- 1	Hoxa7	28.45	b-actin	18.0657
Lin28a-/- 2	Hoxa7	28.71	b-actin	18.4409	28.58	18.5766	10.0034	-1.6811	3.20672		1.34917
Lin28a-/- 2	Hoxa7	28.45	b-actin	18.7122
Lin28a-/- 3	Hoxa7	29.36	b-actin	18.5283	29.53	18.9143	10.6157	-1.06885	2.09776		0.882595
Lin28a-/- 3	Hoxa7	29.7	b-actin	19.3003
Sample Name	Detector Name	Ct	Detector Name	Ct	Ave(Hox)	Ave(b-actin)	dCT	ddCt			relative expression	Ave(relative)	SE	p-value
Wt1	Hoxa9	24.7385	b-actin	17.8043	24.5936	17.8755	6.71817	0	1	1.51978	0.65799	1	0.3551
Wt1	Hoxa9	24.4488	b-actin	17.9466
Wt2	Hoxa9	24.8466	b-actin	17.5461	24.3884	17.612	6.77638	0.058213	0.960453		0.631969
Wt2	Hoxa9	23.9302	b-actin	17.6779
Wt3	Hoxa9	23.6763	b-actin	18.2344	23.8509	18.5106	5.34027	-1.37789	2.59889		1.71004
Wt3	Hoxa9	24.0254	b-actin	18.7868
Lin28a-/- 1	Hoxa9	23.6317	b-actin	18.399	23.5471	18.2323	5.31482	-1.40335	2.64514		1.74048	2.36497	0.312298	0.0447228
Lin28a-/- 1	Hoxa9	23.4626	b-actin	18.0657
Lin28a-/- 2	Hoxa9	23.2507	b-actin	18.4409	23.2754	18.5766	4.6989	-2.01927	4.05378		2.66735
Lin28a-/- 2	Hoxa9	23.3002	b-actin	18.7122
Lin28a-/- 3	Hoxa9	23.5359	b-actin	18.5283	23.6026	18.9143	4.68826	-2.0299	4.08377		2.68708
Lin28a-/- 3	Hoxa9	23.6693	b-actin	19.3003
Sample Name	Detector Name	Ct	Detector Name	Ct	Ave(Hox)	Ave(b-actin)	dCT	ddCt			relative expression	Ave(relative)	SE	p-value
Wt1	Hoxa10	26.7626	b-actin	17.8043	26.7937	17.8755	8.9183	0	1	1.90513	0.5249	1	0.332756
Wt1	Hoxa10	26.8249	b-actin	17.9466
Wt2	Hoxa10	26.0388	b-actin	17.5461	25.8624	17.612	8.25037	-0.667926	1.58879		0.833954
Wt2	Hoxa10	25.686	b-actin	17.6779
Wt3	Hoxa10	26.2761	b-actin	18.2344	25.7843	18.5106	7.27371	-1.64459	3.12659		1.64115
Wt3	Hoxa10	25.2925	b-actin	18.7868
Lin28a-/- 1	Hoxa10	24.581	b-actin	18.399	24.1564	18.2323	5.92406	-2.99424	7.96814		4.18248	9.63394	2.76755	0.0363127
Lin28a-/- 1	Hoxa10	23.7318	b-actin	18.0657
Lin28a-/- 2	Hoxa10	23.1163	b-actin	18.4409	23.0377	18.5766	4.46115	-4.45715	21.9652		11.5295
Lin28a-/- 2	Hoxa10	22.9591	b-actin	18.7122
Lin28a-/- 3	Hoxa10	23.0468	b-actin	18.5283	23.1814	18.9143	4.26706	-4.65124	25.1283		13.1898
Lin28a-/- 3	Hoxa10	23.3159	b-actin	19.3003
Sample Name	Detector Name	Ct	Detector Name	Ct	Ave(Hox)	Ave(b-actin)	dCT	ddCt			relative expression	Ave(relative)	SE	p-value
Wt1	Hoxa11	28.7044	b-actin	17.8043	28.3242	17.8755	10.4487	0	1	2.32497	0.430113	1	0.441357
Wt1	Hoxa11	27.9439	b-actin	17.9466
Wt2	Hoxa11	27.1976	b-actin	17.5461	27.3557	17.612	9.7437	-0.70502	1.63017		0.701155
Wt2	Hoxa11	27.5138	b-actin	17.6779
Wt3	Hoxa11	27.0487	b-actin	18.2344	26.84	18.5106	8.32944	-2.11927	4.34475		1.86873
Wt3	Hoxa11	26.6314	b-actin	18.7868
Lin28a-/- 1	Hoxa11	26.2369	b-actin	18.399	25.8584	18.2323	7.62609	-2.82263	7.07449		3.04283	5.33592	1.32944	0.0363853
Lin28a-/- 1	Hoxa11	25.48	b-actin	18.0657
Lin28a-/- 2	Hoxa11	25.3698	b-actin	18.4409	25.3975	18.5766	6.82092	-3.6278	12.3616		5.3169
Lin28a-/- 2	Hoxa11	25.4251	b-actin	18.7122
Lin28a-/- 3	Hoxa11	25.1788	b-actin	18.5283	25.2107	18.9143	6.29641	-4.1523	17.7815		7.64804
Lin28a-/- 3	Hoxa11	25.2426	b-actin	19.3003
Sample Name	Detector Name	Ct	Detector Name	Ct	Ave(Hox)	Ave(b-actin)	dCT	ddCt			relative expression	Ave(relative)	SE	p-value
Wt1	Hoxa13	30.4901	b-actin	17.8043	30.3048	17.8755	12.4293	0	1	2.44564	0.40889	1	0.435152
Wt1	Hoxa13	30.1194	b-actin	17.9466
Wt2	Hoxa13	29.3602	b-actin	17.5461	29.1809	17.612	11.5689	-0.860426	1.81557		0.742371
Wt2	Hoxa13	29.0015	b-actin	17.6779
Wt3	Hoxa13	29.0481	b-actin	18.2344	28.7631	18.5106	10.2525	-2.17676	4.52136		1.84874
Wt3	Hoxa13	28.4782	b-actin	18.7868
Lin28a-/- 1	Hoxa13	27.4349	b-actin	18.399	27.441	18.2323	9.20869	-3.22061	9.32182		3.8116	6.5864	1.94429	0.0486195
Lin28a-/- 1	Hoxa13	27.4471	b-actin	18.0657
Lin28a-/- 2	Hoxa13	27.1926	b-actin	18.4409	27.2265	18.5766	8.64992	-3.77938	13.7311		5.61453
Lin28a-/- 2	Hoxa13	27.2604	b-actin	18.7122
Lin28a-/- 3	Hoxa13	26.9246	b-actin	18.5283	26.6842	18.9143	7.76989	-4.65941	25.271		10.3331
Lin28a-/- 3	Hoxa13	26.4437	b-actin	19.3003
Sample Name	Detector Name	Ct	Detector Name	Ct	Ave(Hox)	Ave(b-actin)	dCT	ddCt			relative expression	Ave(relative)	SE	p-value
Wt1	Hoxb1	25.2279	b-actin	17.8043	25.3924	17.8755	7.51693	0	1	3.44986	0.289867	1	0.516928
Wt1	Hoxb1	25.5569	b-actin	17.9466
Wt2	Hoxb1	23.7762	b-actin	17.5461	23.848	17.612	6.23603	-1.28091	2.42992		0.704354
Wt2	Hoxb1	23.9199	b-actin	17.6779
Wt3	Hoxb1	23.2152	b-actin	18.2344	23.2368	18.5106	4.72624	-2.7907	6.91965		2.00578
Wt3	Hoxb1	23.2585	b-actin	18.7868
Lin28a-/- 1	Hoxb1	23.0421	b-actin	18.399	23.3304	18.2323	5.09812	-2.41881	5.34731		1.55001	2.19892	0.40067	0.140714
Lin28a-/- 1	Hoxb1	23.6188	b-actin	18.0657
Lin28a-/- 2	Hoxb1	22.9666	b-actin	18.4409	23.2255	18.5766	4.64892	-2.86801	7.30057		2.1162
Lin28a-/- 2	Hoxb1	23.4843	b-actin	18.7122
Lin28a-/- 3	Hoxb1	23.1029	b-actin	18.5283	23.0935	18.9143	4.17922	-3.33771	10.11		2.93056
Lin28a-/- 3	Hoxb1	23.0841	b-actin	19.3003
Sample Name	Detector Name	Ct	Detector Name	Ct	Ave(Hox)	Ave(b-actin)	dCT	ddCt			relative expression	Ave(relative)	SE	p-value
Wt1	Hoxb2	24.99	b-actin	17.8043	25.15	17.8755	7.27455	0	1	1.29987	0.769306	1	0.232947
Wt1	Hoxb2	25.31	b-actin	17.9466
Wt2	Hoxb2	24.83	b-actin	17.5461	24.895	17.612	7.28301	0.008459	0.994154		0.764808
Wt2	Hoxb2	24.96	b-actin	17.6779
Wt3	Hoxb2	24.69	b-actin	18.2344	24.855	18.5106	6.34441	-0.930143	1.90547		1.46589
Wt3	Hoxb2	25.02	b-actin	18.7868
Lin28a-/- 1	Hoxb2	28.67	b-actin	18.399	26.605	18.2323	8.37268	1.09813	0.467121		0.359359	1.15765	0.405347	0.752918
Lin28a-/- 1	Hoxb2	24.54	b-actin	18.0657
Lin28a-/- 2	Hoxb2	24.56	b-actin	18.4409	24.725	18.5766	6.14845	-1.1261	2.18268		1.67915
Lin28a-/- 2	Hoxb2	24.89	b-actin	18.7122
Lin28a-/- 3	Hoxb2	25.21	b-actin	18.5283	25.29	18.9143	6.3757	-0.898848	1.86458		1.43443
Lin28a-/- 3	Hoxb2	25.37	b-actin	19.3003
Sample Name	Detector Name	Ct	Detector Name	Ct	Ave(Hox)	Ave(b-actin)	dCT	ddCt			relative expression	Ave(relative)	SE	p-value
Wt1	Hoxb3	28.06	b-actin	17.8043	27.96	17.8755	10.0845	0	1	1.18408	0.844536	1	0.186881
Wt1	Hoxb3	27.86	b-actin	17.9466
Wt2	Hoxb3	27.77	b-actin	17.5461	27.805	17.612	10.193	0.108459	0.927578		0.783374
Wt2	Hoxb3	27.84	b-actin	17.6779
Wt3	Hoxb3	27.98	b-actin	18.2344	27.895	18.5106	9.38441	-0.700144	1.62467		1.37209
Wt3	Hoxb3	27.81	b-actin	18.7868
Lin28a-/- 1	Hoxb3	28.23	b-actin	18.399	27.95	18.2323	9.71768	-0.366869	1.28955		1.08907	1.53161	0.330024	0.233636
Lin28a-/- 1	Hoxb3	27.67	b-actin	18.0657
Lin28a-/- 2	Hoxb3	27.46	b-actin	18.4409	27.295	18.5766	8.71845	-1.3661	2.57773		2.17699
Lin28a-/- 2	Hoxb3	27.13	b-actin	18.7122
Lin28a-/- 3	Hoxb3	28.3	b-actin	18.5283	28.345	18.9143	9.4307	-0.653849	1.57336		1.32876
Lin28a-/- 3	Hoxb3	28.39	b-actin	19.3003
Sample Name	Detector Name	Ct	Detector Name	Ct	Ave(Hox)	Ave(b-actin)	dCT	ddCt			relative expression	Ave(relative)	SE	p-value
Wt1	Hoxb4	26.18	b-actin	17.8043	25.935	17.8755	8.05955	0	1	1.10686	0.90346	1	0.158188
Wt1	Hoxb4	25.69	b-actin	17.9466
Wt2	Hoxb4	25.73	b-actin	17.5461	25.87	17.612	8.25801	0.198459	0.871481		0.787348
Wt2	Hoxb4	26.01	b-actin	17.6779
Wt3	Hoxb4	26.01	b-actin	18.2344	26.035	18.5106	7.52441	-0.535144	1.44909		1.30919
Wt3	Hoxb4	26.06	b-actin	18.7868
Lin28a-/- 1	Hoxb4	25.72	b-actin	18.399	25.835	18.2323	7.60268	-0.456869	1.37256		1.24005	1.56427	0.228961	0.112519
Lin28a-/- 1	Hoxb4	25.95	b-actin	18.0657
Lin28a-/- 2	Hoxb4	25.47	b-actin	18.4409	25.485	18.5766	6.90845	-1.1511	2.22083		2.00643
Lin28a-/- 2	Hoxb4	25.5	b-actin	18.7122
Lin28a-/- 3	Hoxb4	26.01	b-actin	18.5283	26.295	18.9143	7.3807	-0.678849	1.60086		1.44631
Lin28a-/- 3	Hoxb4	26.58	b-actin	19.3003
Sample Name	Detector Name	Ct	Detector Name	Ct	Ave(Hox)	Ave(b-actin)	dCT	ddCt			relative expression	Ave(relative)	SE	p-value
Wt1	Hoxb5	25.52	b-actin	17.8043	25.445	17.8755	7.56955	0	1	0.982794	1.01751	1	0.098312
Wt1	Hoxb5	25.37	b-actin	17.9466
Wt2	Hoxb5	25.51	b-actin	17.5461	25.49	17.612	7.87801	0.308459	0.807504		0.821641
Wt2	Hoxb5	25.47	b-actin	17.6779
Wt3	Hoxb5	25.83	b-actin	18.2344	25.89	18.5106	7.37941	-0.190144	1.14088		1.16085
Wt3	Hoxb5	25.95	b-actin	18.7868
Lin28a-/- 1	Hoxb5	25.38	b-actin	18.399	25.59	18.2323	7.35768	-0.211869	1.15819		1.17846	1.65883	0.241002	0.0645815
Lin28a-/- 1	Hoxb5	25.8	b-actin	18.0657
Lin28a-/- 2	Hoxb5	25.24	b-actin	18.4409	25.22	18.5766	6.64345	-0.9261	1.90013		1.9334
Lin28a-/- 2	Hoxb5	25.2	b-actin	18.7122
Lin28a-/- 3	Hoxb5	25.63	b-actin	18.5283	25.61	18.9143	6.6957	-0.873849	1.83254		1.86463
Lin28a-/- 3	Hoxb5	25.59	b-actin	19.3003
Sample Name	Detector Name	Ct	Detector Name	Ct	Ave(Hox)	Ave(b-actin)	dCT	ddCt			relative expression	Ave(relative)	SE	p-value
Wt1	Hoxb6	25.18	b-actin	17.8043	25.47	17.8755	7.59455	0	1	1.11247	0.898898	1	0.12096
Wt1	Hoxb6	25.76	b-actin	17.9466
Wt2	Hoxb6	25.25	b-actin	17.5461	25.27	17.612	7.65801	0.063459	0.956967		0.860215
Wt2	Hoxb6	25.29	b-actin	17.6779
Wt3	Hoxb6	25.65	b-actin	18.2344	25.64	18.5106	7.12941	-0.465143	1.38045		1.24089
Wt3	Hoxb6	25.63	b-actin	18.7868
Lin28a-/- 1	Hoxb6	25.37	b-actin	18.399	25.205	18.2323	6.97268	-0.621869	1.53887		1.38328	1.83388	0.239467	0.0359339
Lin28a-/- 1	Hoxb6	25.04	b-actin	18.0657
Lin28a-/- 2	Hoxb6	25.02	b-actin	18.4409	24.88	18.5766	6.30345	-1.2911	2.44715		2.19973
Lin28a-/- 2	Hoxb6	24.74	b-actin	18.7122
Lin28a-/- 3	Hoxb6	25.28	b-actin	18.5283	25.415	18.9143	6.5007	-1.09385	2.13443		1.91863
Lin28a-/- 3	Hoxb6	25.55	b-actin	19.3003
Sample Name	Detector Name	Ct	Detector Name	Ct	Ave(Hox)	Ave(b-actin)	dCT	ddCt			relative expression	Ave(relative)	SE	p-value
Wt1	Hoxb7	32.08	b-actin	17.8043	32.2	17.8755	14.3245	0	1	1.29019	0.775081	1	0.21098
Wt1	Hoxb7	32.32	b-actin	17.9466
Wt2	Hoxb7	31.61	b-actin	17.5461	31.885	17.612	14.273	-0.051541	1.03637		0.803272
Wt2	Hoxb7	32.16	b-actin	17.6779
Wt3	Hoxb7	31.83	b-actin	18.2344	31.96	18.5106	13.4494	-0.875144	1.83419		1.42165
Wt3	Hoxb7	32.09	b-actin	18.7868
Lin28a-/- 1	Hoxb7	31.69	b-actin	18.399	31.705	18.2323	13.4727	-0.851869	1.80484		1.3989	1.62945	0.308324	0.167304
Lin28a-/- 1	Hoxb7	31.72	b-actin	18.0657
Lin28a-/- 2	Hoxb7	31.05	b-actin	18.4409	31.37	18.5766	12.7934	-1.5311	2.89006		2.24003
Lin28a-/- 2	Hoxb7	31.69	b-actin	18.7122
Lin28a-/- 3	Hoxb7	32.72	b-actin	18.5283	32.55	18.9143	13.6357	-0.688849	1.612		1.24943
Lin28a-/- 3	Hoxb7	32.38	b-actin	19.3003
Sample Name	Detector Name	Ct	Detector Name	Ct	Ave(Hox)	Ave(b-actin)	dCT	ddCt			relative expression	Ave(relative)	SE	p-value
Wt1	Hoxb8	28.39	b-actin	17.8043	28.37	17.8755	10.4945	0	1	1.05194	0.950623	1	0.147412
Wt1	Hoxb8	28.35	b-actin	17.9466
Wt2	Hoxb8	28.28	b-actin	17.5461	28.405	17.612	10.793	0.298459	0.81312		0.772971
Wt2	Hoxb8	28.53	b-actin	17.6779
Wt3	Hoxb8	28.57	b-actin	18.2344	28.58	18.5106	10.0694	-0.425144	1.34271		1.27641
Wt3	Hoxb8	28.59	b-actin	18.7868
Lin28a-/- 1	Hoxb8	27.83	b-actin	18.399	27.935	18.2323	9.70268	-0.791869	1.73132		1.64583	2.33308	0.360243	0.0266611
Lin28a-/- 1	Hoxb8	28.04	b-actin	18.0657
Lin28a-/- 2	Hoxb8	27.5	b-actin	18.4409	27.48	18.5766	8.90345	-1.5911	3.01279		2.86403
Lin28a-/- 2	Hoxb8	27.46	b-actin	18.7122
Lin28a-/- 3	Hoxb8	28.07	b-actin	18.5283	28.02	18.9143	9.1057	-1.38885	2.6187		2.48939
Lin28a-/- 3	Hoxb8	27.97	b-actin	19.3003
Sample Name	Detector Name	Ct	Detector Name	Ct	Ave(Hox)	Ave(b-actin)	dCT	ddCt			relative expression	Ave(relative)	SE	p-value
Wt1	Hoxb9	30.58	b-actin	17.8043	31.455	17.8755	13.5795	0	1	1.61095	0.620753	1	0.329078
Wt1	Hoxb9	32.33	b-actin	17.9466
Wt2	Hoxb9	30.57	b-actin	17.5461	30.97	17.612	13.358	-0.221541	1.16598		0.723784
Wt2	Hoxb9	31.37	b-actin	17.6779
Wt3	Hoxb9	30.52	b-actin	18.2344	30.675	18.5106	12.1644	-1.41514	2.66686		1.65546
Wt3	Hoxb9	30.83	b-actin	18.7868
Lin28a-/- 1	Hoxb9	30.42	b-actin	18.399	30.83	18.2323	12.5977	-0.981869	1.97502		1.226	1.4421	0.109758	0.271518
Lin28a-/- 1	Hoxb9	31.24	b-actin	18.0657
Lin28a-/- 2	Hoxb9	30.41	b-actin	18.4409	30.805	18.5766	12.2284	-1.3511	2.55107		1.58358
Lin28a-/- 2	Hoxb9	31.2	b-actin	18.7122
Lin28a-/- 3	Hoxb9	31	b-actin	18.5283	31.205	18.9143	12.2907	-1.28885	2.44333		1.5167
Lin28a-/- 3	Hoxb9	31.41	b-actin	19.3003
Sample Name	Detector Name	Ct	Detector Name	Ct	Ave(Hox)	Ave(b-actin)	dCT	ddCt			relative expression	Ave(relative)	SE	p-value
Wt1	Hoxb13	36.3247	b-actin	17.8043	38.1623	17.8755	20.2869	0	1	2.03607	0.491143	1	0.337447
Wt1	Hoxb13	40	b-actin	17.9466
Wt2	Hoxb13	37.4074	b-actin	17.5461	37.0732	17.612	19.4612	-0.825679	1.77237		0.870487
Wt2	Hoxb13	36.739	b-actin	17.6779
Wt3	Hoxb13	37.1275	b-actin	18.2344	37.0594	18.5106	18.5489	-1.73804	3.33583		1.63837
Wt3	Hoxb13	36.9914	b-actin	18.7868
Lin28a-/- 1	Hoxb13	33.9953	b-actin	18.399	34.5998	18.2323	16.3675	-3.91944	15.131		7.43149	3.45816	2.03412	0.299086
Lin28a-/- 1	Hoxb13	35.2043	b-actin	18.0657
Lin28a-/- 2	Hoxb13	35.3883	b-actin	18.4409	36.6819	18.5766	18.1053	-2.18155	4.53641		2.22803
Lin28a-/- 2	Hoxb13	37.9755	b-actin	18.7122
Lin28a-/- 3	Hoxb13	40	b-actin	18.5283	38.6595	18.9143	19.7452	-0.541693	1.45568		0.714947
Lin28a-/- 3	Hoxb13	37.319	b-actin	19.3003
Sample Name	Detector Name	Ct	Detector Name	Ct	Ave(Hox)	Ave(b-actin)	dCT	ddCt			relative expression	Ave(relative)	SE	p-value
Wt1	Hoxc4	26.81	b-actin	17.8043	27.37	17.8755	9.49455	0	1	1.52355	0.65636	1	0.181392
Wt1	Hoxc4	27.93	b-actin	17.9466
Wt2	Hoxc4	26.37	b-actin	17.5461	26.4	17.612	8.78801	-0.706541	1.63189		1.07111
Wt2	Hoxc4	26.43	b-actin	17.6779
Wt3	Hoxc4	27.01	b-actin	18.2344	27.05	18.5106	8.53941	-0.955143	1.93877		1.27253
Wt3	Hoxc4	27.09	b-actin	18.7868
Lin28a-/- 1	Hoxc4	26.86	b-actin	18.399	27.01	18.2323	8.77768	-0.716869	1.64361		1.0788	1.53106	0.228443	0.142783
Lin28a-/- 1	Hoxc4	27.16	b-actin	18.0657
Lin28a-/- 2	Hoxc4	26.42	b-actin	18.4409	26.605	18.5766	8.02845	-1.4661	2.76274		1.81335
Lin28a-/- 2	Hoxc4	26.79	b-actin	18.7122
Lin28a-/- 3	Hoxc4	26.99	b-actin	18.5283	27.035	18.9143	8.1207	-1.37385	2.59161		1.70103
Lin28a-/- 3	Hoxc4	27.08	b-actin	19.3003
Sample Name	Detector Name	Ct	Detector Name	Ct	Ave(Hox)	Ave(b-actin)	dCT	ddCt			relative expression	Ave(relative)	SE	p-value
Wt1	Hoxc5	28.2921	b-actin	17.8043	27.9163	17.8755	10.0409	0	1	7.01064	0.14264	1	0.749766
Wt1	Hoxc5	27.5406	b-actin	17.9466
Wt2	Hoxc5	26.7868	b-actin	17.5461	26.3043	17.612	8.69232	-1.34857	2.54659		0.363246
Wt2	Hoxc5	25.8218	b-actin	17.6779
Wt3	Hoxc5	24.8271	b-actin	18.2344	24.4234	18.5106	5.91281	-4.12807	17.4853		2.49411
Wt3	Hoxc5	24.0197	b-actin	18.7868
Lin28a-/- 1	Hoxc5	23.5887	b-actin	18.399	23.6313	18.2323	5.39901	-4.64187	24.9656		3.5611	2.97062	0.597517	0.109016
Lin28a-/- 1	Hoxc5	23.6739	b-actin	18.0657
Lin28a-/- 2	Hoxc5	23.6458	b-actin	18.4409	23.9699	18.5766	5.39333	-4.64755	25.0641		3.57515
Lin28a-/- 2	Hoxc5	24.2939	b-actin	18.7122
Lin28a-/- 3	Hoxc5	25.346	b-actin	18.5283	25.3173	18.9143	6.40302	-3.63787	12.4482		1.77561
Lin28a-/- 3	Hoxc5	25.2886	b-actin	19.3003
Sample Name	Detector Name	Ct	Detector Name	Ct	Ave(Hox)	Ave(b-actin)	dCT	ddCt			relative expression	Ave(relative)	SE	p-value
Wt1	Hoxc6	25.6012	b-actin	17.8043	25.1709	17.8755	7.29547	0	1	1.28625	0.777453	1	0.181649
Wt1	Hoxc6	24.7407	b-actin	17.9466
Wt2	Hoxc6	24.5064	b-actin	17.5461	24.7575	17.612	7.14555	-0.149917	1.10951		0.862589
Wt2	Hoxc6	25.0087	b-actin	17.6779
Wt3	Hoxc6	24.4907	b-actin	18.2344	24.9993	18.5106	6.48874	-0.806735	1.74925		1.35996
Wt3	Hoxc6	25.5079	b-actin	18.7868
Lin28a-/- 1	Hoxc6	24.6804	b-actin	18.399	24.4148	18.2323	6.18252	-1.11295	2.16287		1.68153	2.19912	0.375635	0.0452925
Lin28a-/- 1	Hoxc6	24.1493	b-actin	18.0657
Lin28a-/- 2	Hoxc6	24.3552	b-actin	18.4409	24.5187	18.5766	5.94219	-1.35328	2.55492		1.98633
Lin28a-/- 2	Hoxc6	24.6823	b-actin	18.7122
Lin28a-/- 3	Hoxc6	24.436	b-actin	18.5283	24.2959	18.9143	5.38165	-1.91382	3.76806		2.92949
Lin28a-/- 3	Hoxc6	24.1559	b-actin	19.3003
Sample Name	Detector Name	Ct	Detector Name	Ct	Ave(Hox)	Ave(b-actin)	dCT	ddCt			relative expression	Ave(relative)	SE	p-value
Wt1	Hoxc8	24.436	b-actin	17.8043	25.1364	17.8755	7.26091	0	1	1.00799	0.992075	1	0.0836624
Wt1	Hoxc8	25.8367	b-actin	17.9466
Wt2	Hoxc8	23.8239	b-actin	17.5461	24.6614	17.612	7.04942	-0.21149	1.15788		1.14871
Wt2	Hoxc8	25.4989	b-actin	17.6779
Wt3	Hoxc8	25.9463	b-actin	18.2344	25.9789	18.5106	7.46834	0.207426	0.866081		0.859218
Wt3	Hoxc8	26.0115	b-actin	18.7868
Lin28a-/- 1	Hoxc8	23.8803	b-actin	18.399	23.1937	18.2323	4.96135	-2.29956	4.92308		4.88407	5.31288	0.282647	0.000126941
Lin28a-/- 1	Hoxc8	22.507	b-actin	18.0657
Lin28a-/- 2	Hoxc8	23.8617	b-actin	18.4409	23.4452	18.5766	4.86862	-2.39229	5.2499		5.20829
Lin28a-/- 2	Hoxc8	23.0286	b-actin	18.7122
Lin28a-/- 3	Hoxc8	23.4574	b-actin	18.5283	23.6162	18.9143	4.70192	-2.559	5.89298		5.84628
Lin28a-/- 3	Hoxc8	23.775	b-actin	19.3003
Sample Name	Detector Name	Ct	Detector Name	Ct	Ave(Hox)	Ave(b-actin)	dCT	ddCt			relative expression	Ave(relative)	SE	p-value
Wt1	Hoxc9	31.49	b-actin	17.8043	31.205	17.8755	13.3295	0	1	1.19933	0.833799	1	0.108551
Wt1	Hoxc9	30.92	b-actin	17.9466
Wt2	Hoxc9	30.81	b-actin	17.5461	30.735	17.612	13.123	-0.206541	1.15392		0.962135
Wt2	Hoxc9	30.66	b-actin	17.6779
Wt3	Hoxc9	31.58	b-actin	18.2344	31.31	18.5106	12.7994	-0.530144	1.44407		1.20407
Wt3	Hoxc9	31.04	b-actin	18.7868
Lin28a-/- 1	Hoxc9	30.39	b-actin	18.399	30.405	18.2323	12.1727	-1.15687	2.22973		1.85915	1.61371	0.162186	0.0346917
Lin28a-/- 1	Hoxc9	30.42	b-actin	18.0657
Lin28a-/- 2	Hoxc9	31.17	b-actin	18.4409	30.9	18.5766	12.3234	-1.0061	2.00847		1.67466
Lin28a-/- 2	Hoxc9	30.63	b-actin	18.7122
Lin28a-/- 3	Hoxc9	32	b-actin	18.5283	31.595	18.9143	12.6807	-0.648848	1.56792		1.30733
Lin28a-/- 3	Hoxc9	31.19	b-actin	19.3003
Sample Name	Detector Name	Ct	Detector Name	Ct	Ave(Hox)	Ave(b-actin)	dCT	ddCt			relative expression	Ave(relative)	SE	p-value
Wt1	Hoxc10	28.46	b-actin	17.8043	28.48	17.8755	10.6045	0	1	1.52065	0.657613	1	0.179003
Wt1	Hoxc10	28.5	b-actin	17.9466
Wt2	Hoxc10	27.59	b-actin	17.5461	27.5	17.612	9.88801	-0.716541	1.64324		1.08061
Wt2	Hoxc10	27.41	b-actin	17.6779
Wt3	Hoxc10	28.19	b-actin	18.2344	28.175	18.5106	9.66441	-0.940144	1.91872		1.26177
Wt3	Hoxc10	28.16	b-actin	18.7868
Lin28a-/- 1	Hoxc10	28.58	b-actin	18.399	28.505	18.2323	10.2727	-0.331869	1.25864		0.827699	0.897399	0.102477	0.644988
Lin28a-/- 1	Hoxc10	28.43	b-actin	18.0657
Lin28a-/- 2	Hoxc10	28.51	b-actin	18.4409	28.44	18.5766	9.86345	-0.7411	1.67145		1.09917
Lin28a-/- 2	Hoxc10	28.37	b-actin	18.7122
Lin28a-/- 3	Hoxc10	29.46	b-actin	18.5283	29.3	18.9143	10.3857	-0.218849	1.1638		0.765332
Lin28a-/- 3	Hoxc10	29.14	b-actin	19.3003
Sample Name	Detector Name	Ct	Detector Name	Ct	Ave(Hox)	Ave(b-actin)	dCT	ddCt			relative expression	Ave(relative)	SE	p-value
Wt1	Hoxc11	35.23	b-actin	17.8043	35.145	17.8755	17.2695	0	1	0.870201	1.14916	1	0.153231
Wt1	Hoxc11	35.06	b-actin	17.9466
Wt2	Hoxc11	35.91	b-actin	17.5461	35.61	17.612	17.998	0.728459	0.603548		0.693573
Wt2	Hoxc11	35.31	b-actin	17.6779
Wt3	Hoxc11	34.62	b-actin	18.2344	35.77	18.5106	17.2594	-0.0101435	1.00706		1.15727
Wt3	Hoxc11	36.92	b-actin	18.7868
Lin28a-/- 1	Hoxc11	35.59	b-actin	18.399	35.62	18.2323	17.3877	0.118131	0.921381		1.05881	1.15582	0.217183	0.5892
Lin28a-/- 1	Hoxc11	35.65	b-actin	18.0657
Lin28a-/- 2	Hoxc11	35.15	b-actin	18.4409	35.395	18.5766	16.8184	-0.4511	1.36708		1.571
Lin28a-/- 2	Hoxc11	35.64	b-actin	18.7122
Lin28a-/- 3	Hoxc11	36.34	b-actin	18.5283	36.64	18.9143	17.7257	0.456152	0.728928		0.837655
Lin28a-/- 3	Hoxc11	36.94	b-actin	19.3003
Sample Name	Detector Name	Ct	Detector Name	Ct	Ave(Hox)	Ave(b-actin)	dCT	ddCt			relative expression	Ave(relative)	SE	p-value
Wt1	Hoxc12	38.19	b-actin	17.8043	37.8	17.8755	19.9245	0	1	0.506441	1.97456	1	0.495401
Wt1	Hoxc12	37.41	b-actin	17.9466
Wt2	Hoxc12	40	b-actin	17.5461	40	17.612	22.388	2.46346	0.181311		0.358011
Wt2	Hoxc12	40	b-actin	17.6779
Wt3	Hoxc12	40	b-actin	18.2344	40	18.5106	21.4894	1.56486	0.338011		0.667425
Wt3	Hoxc12	40	b-actin	18.7868
Lin28a-/- 1	Hoxc12	36.82	b-actin	18.399	38.145	18.2323	19.9127	-0.011869	1.00826		1.99088	4.84305	1.48351	0.0699072
Lin28a-/- 1	Hoxc12	39.47	b-actin	18.0657
Lin28a-/- 2	Hoxc12	37.44	b-actin	18.4409	36.68	18.5766	18.1034	-1.8211	3.53351		6.97713
Lin28a-/- 2	Hoxc12	35.92	b-actin	18.7122
Lin28a-/- 3	Hoxc12	36.86	b-actin	18.5283	37.345	18.9143	18.4307	-1.49385	2.81639		5.56115
Lin28a-/- 3	Hoxc12	37.83	b-actin	19.3003
Sample Name	Detector Name	Ct	Detector Name	Ct	Ave(Hox)	Ave(b-actin)	dCT	ddCt			relative expression	Ave(relative)	SE	p-value
Wt1	Hoxc13	30.8396	b-actin	17.8043	31.3922	17.8755	13.5168	0	1	0.749198	1.33476	1	0.181225
Wt1	Hoxc13	31.9449	b-actin	17.9466
Wt2	Hoxc13	31.7415	b-actin	17.5461	32.0348	17.612	14.4228	0.906045	0.533646		0.71229
Wt2	Hoxc13	32.3281	b-actin	17.6779
Wt3	Hoxc13	32.7899	b-actin	18.2344	32.5135	18.5106	14.0029	0.48611	0.713948		0.952949
Wt3	Hoxc13	32.237	b-actin	18.7868
Lin28a-/- 1	Hoxc13	29.8696	b-actin	18.399	30.1377	18.2323	11.9054	-1.61135	3.05538		4.0782	7.70568	2.04879	0.0310731
Lin28a-/- 1	Hoxc13	30.4058	b-actin	18.0657
Lin28a-/- 2	Hoxc13	29.1028	b-actin	18.4409	29.5337	18.5766	10.9572	-2.55961	5.89547		7.86905
Lin28a-/- 2	Hoxc13	29.9647	b-actin	18.7122
Lin28a-/- 3	Hoxc13	29.278	b-actin	18.5283	29.3661	18.9143	10.4518	-3.06495	8.36837		11.1698
Lin28a-/- 3	Hoxc13	29.4542	b-actin	19.3003
Sample Name	Detector Name	Ct	Detector Name	Ct	Ave(Hox)	Ave(b-actin)	dCT	ddCt			relative expression	Ave(relative)	SE	p-value
Wt1	Hoxd1	31.27	b-actin	17.8043	30.4	17.8755	12.5245	0	1	2.06744	0.483691	1	0.345372
Wt1	Hoxd1	29.53	b-actin	17.9466
Wt2	Hoxd1	29.63	b-actin	17.5461	29.305	17.612	11.693	-0.831541	1.77959		0.860769
Wt2	Hoxd1	28.98	b-actin	17.6779
Wt3	Hoxd1	29.53	b-actin	18.2344	29.26	18.5106	10.7494	-1.77514	3.42272		1.65554
Wt3	Hoxd1	28.99	b-actin	18.7868
Lin28a-/- 1	Hoxd1	29.6	b-actin	18.399	29.255	18.2323	11.0227	-1.50187	2.83209		1.36986	1.25557	0.118716	0.52262
Lin28a-/- 1	Hoxd1	28.91	b-actin	18.0657
Lin28a-/- 2	Hoxd1	30.2	b-actin	18.4409	29.59	18.5766	11.0134	-1.5111	2.85027		1.37865
Lin28a-/- 2	Hoxd1	28.98	b-actin	18.7122
Lin28a-/- 3	Hoxd1	30.78	b-actin	18.5283	30.365	18.9143	11.4507	-1.07385	2.10504		1.01819
Lin28a-/- 3	Hoxd1	29.95	b-actin	19.3003
Sample Name	Detector Name	Ct	Detector Name	Ct	Ave(Hox)	Ave(b-actin)	dCT	ddCt			relative expression	Ave(relative)	SE	p-value
Wt1	Hoxd3	27.6705	b-actin	17.8043	27.5886	17.8755	9.71314	0	1	1.91888	0.521137	1	0.30709
Wt1	Hoxd3	27.5067	b-actin	17.9466
Wt2	Hoxd3	26.873	b-actin	17.5461	26.5267	17.612	8.91471	-0.798436	1.73921		0.90637
Wt2	Hoxd3	26.1804	b-actin	17.6779
Wt3	Hoxd3	26.6265	b-actin	18.2344	26.6304	18.5106	8.11983	-1.59332	3.01743		1.57249
Wt3	Hoxd3	26.6343	b-actin	18.7868
Lin28a-/- 1	Hoxd3	25.9891	b-actin	18.399	25.9246	18.2323	7.69233	-2.02081	4.05813		2.11484	3.66098	1.09131	0.0787581
Lin28a-/- 1	Hoxd3	25.8602	b-actin	18.0657
Lin28a-/- 2	Hoxd3	25.473	b-actin	18.4409	25.7172	18.5766	7.14066	-2.57249	5.94833		3.0999
Lin28a-/- 2	Hoxd3	25.9614	b-actin	18.7122
Lin28a-/- 3	Hoxd3	25.418	b-actin	18.5283	25.1591	18.9143	6.24476	-3.46839	11.0685		5.76821
Lin28a-/- 3	Hoxd3	24.9001	b-actin	19.3003
Sample Name	Detector Name	Ct	Detector Name	Ct	Ave(Hox)	Ave(b-actin)	dCT	ddCt			relative expression	Ave(relative)	SE	p-value
Wt1	Hoxd4	33.63	b-actin	17.8043	33.615	17.8755	15.7395	0	1	1.82683	0.547395	1	0.268037
Wt1	Hoxd4	33.6	b-actin	17.9466
Wt2	Hoxd4	32.37	b-actin	17.5461	32.515	17.612	14.903	-0.836541	1.78576		0.977519
Wt2	Hoxd4	32.66	b-actin	17.6779
Wt3	Hoxd4	32.78	b-actin	18.2344	32.82	18.5106	14.3094	-1.43014	2.69474		1.47509
Wt3	Hoxd4	32.86	b-actin	18.7868
Lin28a-/- 1	Hoxd4	32.33	b-actin	18.399	32.285	18.2323	14.0527	-1.68687	3.21957		1.76238	1.15826	0.523157	0.801064
Lin28a-/- 1	Hoxd4	32.24	b-actin	18.0657
Lin28a-/- 2	Hoxd4	33.1	b-actin	18.4409	36.55	18.5766	17.9734	2.2339	0.212583		0.116367
Lin28a-/- 2	Hoxd4	40	b-actin	18.7122
Lin28a-/- 3	Hoxd4	33.09	b-actin	18.5283	33.11	18.9143	14.1957	-1.54385	2.91571		1.59605
Lin28a-/- 3	Hoxd4	33.13	b-actin	19.3003
Sample Name	Detector Name	Ct	Detector Name	Ct	Ave(Hox)	Ave(b-actin)	dCT	ddCt			relative expression	Ave(relative)	SE	p-value
Wt1	Hoxd8	31.69	b-actin	17.8043	31.84	17.8755	13.9645	0	1	1.40016	0.714206	1	0.222586
Wt1	Hoxd8	31.99	b-actin	17.9466
Wt2	Hoxd8	31.35	b-actin	17.5461	31.33	17.612	13.718	-0.246541	1.18636		0.847305
Wt2	Hoxd8	31.31	b-actin	17.6779
Wt3	Hoxd8	31.72	b-actin	18.2344	31.465	18.5106	12.9544	-1.01014	2.01411		1.43849
Wt3	Hoxd8	31.21	b-actin	18.7868
Lin28a-/- 1	Hoxd8	31.23	b-actin	18.399	31.295	18.2323	13.0627	-0.901869	1.86849		1.33448	1.47648	0.157342	0.155372
Lin28a-/- 1	Hoxd8	31.36	b-actin	18.0657
Lin28a-/- 2	Hoxd8	31.12	b-actin	18.4409	31.215	18.5766	12.6384	-1.3261	2.50724		1.79068
Lin28a-/- 2	Hoxd8	31.31	b-actin	18.7122
Lin28a-/- 3	Hoxd8	31.88	b-actin	18.5283	32.01	18.9143	13.0957	-0.868849	1.8262		1.30429
Lin28a-/- 3	Hoxd8	32.14	b-actin	19.3003
Sample Name	Detector Name	Ct	Detector Name	Ct	Ave(Hox)	Ave(b-actin)	dCT	ddCt			relative expression	Ave(relative)	SE	p-value
Wt1	Hoxd9	31.15	b-actin	17.8043	30.94	17.8755	13.0645	0	1	1.71903	0.581724	1	0.312646
Wt1	Hoxd9	30.73	b-actin	17.9466
Wt2	Hoxd9	30.11	b-actin	17.5461	30.205	17.612	12.593	-0.471541	1.38659		0.806613
Wt2	Hoxd9	30.3	b-actin	17.6779
Wt3	Hoxd9	30.12	b-actin	18.2344	30.105	18.5106	11.5944	-1.47014	2.77049		1.61166
Wt3	Hoxd9	30.09	b-actin	18.7868
Lin28a-/- 1	Hoxd9	30.37	b-actin	18.399	30.365	18.2323	12.1327	-0.931869	1.90775		1.10978	1.07328	0.0483072	0.828189
Lin28a-/- 1	Hoxd9	30.36	b-actin	18.0657
Lin28a-/- 2	Hoxd9	30.56	b-actin	18.4409	30.68	18.5766	12.1034	-0.9611	1.94679		1.1325
Lin28a-/- 2	Hoxd9	30.8	b-actin	18.7122
Lin28a-/- 3	Hoxd9	31.05	b-actin	18.5283	31.23	18.9143	12.3157	-0.748848	1.68045		0.977559
Lin28a-/- 3	Hoxd9	31.41	b-actin	19.3003
Sample Name	Detector Name	Ct	Detector Name	Ct	Ave(Hox)	Ave(b-actin)	dCT	ddCt			relative expression	Ave(relative)	SE	p-value
Wt1	Hoxd10	27.92	b-actin	17.8043	28.185	17.8755	10.3095	0	1	1.21277	0.824561	1	0.0987364
Wt1	Hoxd10	28.45	b-actin	17.9466
Wt2	Hoxd10	27.63	b-actin	17.5461	27.63	17.612	10.018	-0.291541	1.22395		1.00922
Wt2	Hoxd10	27.63	b-actin	17.6779
Wt3	Hoxd10	28.4	b-actin	18.2344	28.32	18.5106	9.80941	-0.500144	1.41435		1.16622
Wt3	Hoxd10	28.24	b-actin	18.7868
Lin28a-/- 1	Hoxd10	28.18	b-actin	18.399	28.195	18.2323	9.96268	-0.346869	1.2718		1.04867	1.14079	0.102362	0.378258
Lin28a-/- 1	Hoxd10	28.21	b-actin	18.0657
Lin28a-/- 2	Hoxd10	28.08	b-actin	18.4409	28.18	18.5766	9.60345	-0.7061	1.63139		1.34518
Lin28a-/- 2	Hoxd10	28.28	b-actin	18.7122
Lin28a-/- 3	Hoxd10	28.66	b-actin	18.5283	28.905	18.9143	9.9907	-0.318849	1.24733		1.0285
Lin28a-/- 3	Hoxd10	29.15	b-actin	19.3003
Sample Name	Detector Name	Ct	Detector Name	Ct	Ave(Hox)	Ave(b-actin)	dCT	ddCt			relative expression	Ave(relative)	SE	p-value
Wt1	Hoxd11	36.97	b-actin	17.8043	37.04	17.8755	19.1645	0	1	1.07623	0.929169	1	0.285082
Wt1	Hoxd11	37.11	b-actin	17.9466
Wt2	Hoxd11	36.68	b-actin	17.5461	37.545	17.612	19.933	0.768459	0.587044		0.545463
Wt2	Hoxd11	38.41	b-actin	17.6779
Wt3	Hoxd11	37.36	b-actin	18.2344	36.96	18.5106	18.4494	-0.715143	1.64165		1.52537
Wt3	Hoxd11	36.56	b-actin	18.7868
Lin28a-/- 1	Hoxd11	37.15	b-actin	18.399	36.83	18.2323	18.5977	-0.566869	1.48131		1.37638	1.72284	0.180392	0.0987956
Lin28a-/- 1	Hoxd11	36.51	b-actin	18.0657
Lin28a-/- 2	Hoxd11	37.04	b-actin	18.4409	36.78	18.5766	18.2034	-0.9611	1.94679		1.8089
Lin28a-/- 2	Hoxd11	36.52	b-actin	18.7122
Lin28a-/- 3	Hoxd11	36.89	b-actin	18.5283	36.985	18.9143	18.0707	-1.09385	2.13443		1.98324
Lin28a-/- 3	Hoxd11	37.08	b-actin	19.3003
Sample Name	Detector Name	Ct	Detector Name	Ct	Ave(Hox)	Ave(b-actin)	dCT	ddCt			relative expression	Ave(relative)	SE	p-value
Wt1	Hoxd12	28.33	b-actin	17.8043	28.265	17.8755	10.3895	0	1	0.582635	1.71634	1	0.358193
Wt1	Hoxd12	28.2	b-actin	17.9466
Wt2	Hoxd12	29.44	b-actin	17.5461	29.405	17.612	11.793	1.40346	0.378022		0.648814
Wt2	Hoxd12	29.37	b-actin	17.6779
Wt3	Hoxd12	30.14	b-actin	18.2344	30.335	18.5106	11.8244	1.43486	0.369884		0.634846
Wt3	Hoxd12	30.53	b-actin	18.7868
Lin28a-/- 1	Hoxd12	27.51	b-actin	18.399	27.565	18.2323	9.33268	-1.05687	2.08041		3.57069	4.87954	0.811881	0.0119505
Lin28a-/- 1	Hoxd12	27.62	b-actin	18.0657
Lin28a-/- 2	Hoxd12	27.11	b-actin	18.4409	27.075	18.5766	8.49845	-1.8911	3.70918		6.36621
Lin28a-/- 2	Hoxd12	27.04	b-actin	18.7122
Lin28a-/- 3	Hoxd12	27.64	b-actin	18.5283	27.85	18.9143	8.9357	-1.45385	2.73938		4.7017
Lin28a-/- 3	Hoxd12	28.06	b-actin	19.3003
Sample Name	Detector Name	Ct	Detector Name	Ct	Ave(Hox)	Ave(b-actin)	dCT	ddCt			relative expression	Ave(relative)	SE	p-value
Wt1	Hoxd13	29.74	b-actin	17.8043	29.505	17.8755	11.6295	0	1	0.915056	1.09283	1	0.0465201
Wt1	Hoxd13	29.27	b-actin	17.9466
Wt2	Hoxd13	29.46	b-actin	17.5461	29.43	17.612	11.818	0.188459	0.877543		0.959004
Wt2	Hoxd13	29.4	b-actin	17.6779
Wt3	Hoxd13	30.76	b-actin	18.2344	30.345	18.5106	11.8344	0.204856	0.867625		0.948166
Wt3	Hoxd13	29.93	b-actin	18.7868
Lin28a-/- 1	Hoxd13	28.94	b-actin	18.399	29.01	18.2323	10.7777	-0.851869	1.80484		1.97238	2.6059	0.41865	0.0189006
Lin28a-/- 1	Hoxd13	29.08	b-actin	18.0657
Lin28a-/- 2	Hoxd13	28.14	b-actin	18.4409	28.57	18.5766	9.99345	-1.6361	3.10824		3.39678
Lin28a-/- 2	Hoxd13	29	b-actin	18.7122
Lin28a-/- 3	Hoxd13	29.35	b-actin	18.5283	29.38	18.9143	10.4657	-1.16385	2.24054		2.44853
Lin28a-/- 3	Hoxd13	29.41	b-actin	19.3003
