# Supplementary material for: Lin28a/let-7 pathway modulates the Hox code via Polycomb regulation during axial patterning in vertebrates
Source: eLife. 2020 May 29;9:e53608. doi: 10.7554/eLife.53608 (PMC7259951; doi:10.7554/eLife.53608)
Supplement: Figure 3—source data 1. [file elife-53608-fig3-data1.xlsx]

## Sheet: Taqman array
Assay	Type	KO-1	KO-2	KO-3	Wt-1	Wt-2	Wt-3	Average(Wt)	KO-1	KO-2	KO-3	Wt-1	Wt-2	Wt-3	Average(Wt)	Average(KO)	S.E(Wt)	S.E(KO)	p value
ath-miR159a	Target	0.00051465	1.189e-05	4.3e-07	4e-07	4.1e-07	4.4e-07	4.16667e-07	1235.16	28.536	1.032	0.96	0.984	1.056	1	421.576	0.0288444	406.869	0.35968
rno-miR-881	Target	3.6e-07	0.00030862	4.3e-07	4e-07	3.4e-07	4.4e-07	3.93333e-07	0.915254	784.627	1.09322	1.01695	0.864407	1.11864	1	262.212	0.0738796	261.208	0.373894
mmu-miR-98	Target	0.00013567	7.033e-05	1.386e-05	3.14e-06	3.4e-07	4.4e-07	1.30667e-06	103.829	53.824	10.6071	2.40306	0.260204	0.336735	1	56.0867	0.701878	26.9346	0.110377
mmu-miR-883a-3p	Target	3.6e-07	6.039e-05	4.3e-07	4e-07	3.4e-07	4.4e-07	3.93333e-07	0.915254	153.534	1.09322	1.01695	0.864407	1.11864	1	51.8475	0.0738796	50.8432	0.373866
mmu-miR-342-5p	Target	3.6e-07	5.883e-05	4.3e-07	4e-07	3.4e-07	4.4e-07	3.93333e-07	0.915254	149.568	1.09322	1.01695	0.864407	1.11864	1	50.5254	0.0738796	49.5212	0.373865
mmu-miR-450b-5p	Target	3.6e-07	2.575e-05	6.85e-06	4e-07	3.4e-07	4.4e-07	3.93333e-07	0.915254	65.4661	17.4153	1.01695	0.864407	1.11864	1	27.9322	0.0738796	19.362	0.236612
mmu-let-7f	Target	7.239e-05	4.091e-05	5.605e-05	4e-07	5.28e-06	4.4e-07	2.04e-06	35.4853	20.0539	27.4755	0.196078	2.58824	0.215686	1	27.6716	0.794138	4.45573	0.00414673
mmu-let-7d	Target	0.0005929	0.00051903	0.00011194	1.303e-05	2.078e-05	1.416e-05	1.599e-05	37.0794	32.4597	7.00063	0.814884	1.29956	0.885553	1	25.5132	0.151164	9.35188	0.058746
mmu-let-7g	Target	0.00337976	0.00291169	0.00089907	5.218e-05	0.00017406	5.65e-05	9.42467e-05	35.8608	30.8944	9.53954	0.553654	1.84686	0.599491	1	25.4316	0.423635	8.07431	0.0390986
rno-miR-878	Target	2.631e-05	3.6e-07	4.3e-07	4e-07	3.4e-07	4.4e-07	3.93333e-07	66.8898	0.915254	1.09322	1.01695	0.864407	1.11864	1	22.9661	0.0738796	21.9619	0.373822
mmu-let-7a	Target	0.00075456	0.00030553	0.00022781	2.518e-05	3.709e-05	6.83e-06	2.30333e-05	32.7595	13.2647	9.89045	1.0932	1.61027	0.296527	1	18.6382	0.382099	7.12751	0.0688641
mmu-let-7i	Target	0.00190451	0.0019583	0.00089813	5.213e-05	0.00018773	5.587e-05	9.85767e-05	19.3201	19.8658	9.11098	0.528827	1.90441	0.566767	1	16.0989	0.452336	3.49753	0.0128337
mmu-miR-670	Target	3.6e-07	1.972e-05	4.3e-07	4e-07	4.6e-07	4.4e-07	4.33333e-07	0.830769	45.5077	0.992308	0.923077	1.06154	1.01538	1	15.7769	0.0407039	14.8655	0.376467
mmu-miR-423-5p	Target	1.693e-05	3.6e-07	4.3e-07	4e-07	3.4e-07	4.4e-07	3.93333e-07	43.0424	0.915254	1.09322	1.01695	0.864407	1.11864	1	15.0169	0.0738796	14.0128	0.37378
mmu-miR-452	Target	1.19e-05	3.6e-07	4.3e-07	4e-07	3.4e-07	4.4e-07	3.93333e-07	30.2542	0.915254	1.09322	1.01695	0.864407	1.11864	1	10.7542	0.0738796	9.75014	0.373733
mmu-let-7e	Target	0.00283223	0.00455262	0.00088398	0.00020589	0.00059763	5.562e-05	0.00028638	9.88976	15.8971	3.08674	0.71894	2.08684	0.194217	1	9.62454	0.564138	3.70042	0.0825684
mmu-miR-99a	Target	1.04e-05	3.6e-07	4.3e-07	4e-07	3.4e-07	4.4e-07	3.93333e-07	26.4407	0.915254	1.09322	1.01695	0.864407	1.11864	1	9.48305	0.0738796	8.47897	0.373711
mmu-miR-654-3p	Target	3.6e-07	1.685e-05	4.3e-07	4e-07	1.17e-06	4.4e-07	6.7e-07	0.537313	25.1493	0.641791	0.597015	1.74627	0.656716	1	8.77612	0.373532	8.18662	0.396417
rno-miR-327	Target	4.744e-05	1.097e-05	4.3e-07	4e-07	5.91e-06	4.4e-07	2.25e-06	21.0844	4.87556	0.191111	0.177778	2.62667	0.195556	1	8.71704	0.81335	6.32984	0.293165
rno-miR-505	Target	8.56e-06	3.6e-07	4.3e-07	4e-07	4.2e-07	4.4e-07	4.2e-07	20.381	0.857143	1.02381	0.952381	1	1.04762	1	7.42063	0.0274929	6.48034	0.377878
mmu-miR-129-5p	Target	5.7e-07	3.6e-07	7.67e-06	4e-07	3.4e-07	4.4e-07	3.93333e-07	1.44915	0.915254	19.5	1.01695	0.864407	1.11864	1	7.28814	0.0738796	6.10788	0.361448
mmu-let-7c	Target	0.00036141	0.0002074	0.00011334	2.615e-05	6.236e-05	7.16e-06	3.189e-05	11.333	6.50361	3.55409	0.820006	1.95547	0.224522	1	7.13024	0.507722	2.26734	0.0576781
mmu-miR-150	Target	0.00042641	5.428e-05	1.421e-05	1.335e-05	2.719e-05	2.898e-05	2.31733e-05	18.4009	2.34235	0.613205	0.576093	1.17333	1.25058	1	7.11881	0.213123	5.66308	0.341028
mmu-miR-129-3p	Target	0.00064803	0.00012541	2.815e-05	4.913e-05	6.055e-05	2.714e-05	4.56067e-05	14.2091	2.74982	0.617234	1.07725	1.32766	0.595088	1	5.85872	0.214973	4.22034	0.314305
mmu-miR-9	Target	0.00591347	0.0074916	0.00358728	0.00170814	0.00104443	0.00046079	0.00107112	5.52083	6.99417	3.34909	1.59472	0.975082	0.430195	1	5.28803	0.336401	1.05866	0.0181438
mmu-miR-331-5p	Target	4.264e-05	0.00016145	6.54e-06	6.44e-06	2.666e-05	7.01e-06	1.337e-05	3.18923	12.0755	0.489155	0.481675	1.99402	0.524308	1	5.25131	0.497161	3.50001	0.295454
mmu-miR-881	Target	0.00044531	0.00041472	4.3e-07	4e-07	0.00017285	4.4e-07	5.78967e-05	7.69146	7.16311	0.00742703	0.00690886	2.98549	0.00759975	1	4.954	0.992746	2.47798	0.212672
mmu-miR-743a	Target	5.507e-05	4.86e-06	4.3e-07	4e-07	1.174e-05	4.4e-07	4.19333e-06	13.1328	1.15898	0.102544	0.0953895	2.79968	0.104928	1	4.79809	0.899845	4.17847	0.424429
mmu-miR-488	Target	6.461e-05	1.163e-05	4.3e-07	1.317e-05	3.4e-07	3.61e-06	5.70667e-06	11.3218	2.03797	0.0753505	2.30783	0.0595794	0.632593	1	4.47839	0.674511	3.46832	0.380625
mmu-miR-449a	Target	0.00029618	4.296e-05	1.403e-05	6.54e-06	4.376e-05	2.871e-05	2.63367e-05	11.2459	1.63119	0.532717	0.248323	1.66156	1.09012	1	4.46994	0.410448	3.4028	0.368613
mmu-miR-590-5p	Target	1.976e-05	9.43e-06	1.4e-05	4e-07	2.09e-06	7.27e-06	3.25333e-06	6.07377	2.89857	4.30328	0.122951	0.642418	2.23463	1	4.4252	0.635268	0.918628	0.0374119
rno-miR-345-3p	Target	0.00010224	0.00025276	2.746e-05	1.31e-05	5.932e-05	1.409e-05	2.88367e-05	3.54549	8.76523	0.95226	0.454283	2.0571	0.488614	1	4.42099	0.528645	2.2975	0.220379
mmu-miR-345-3p	Target	1.937e-05	2.777e-05	1.373e-05	6.49e-06	3.4e-07	7.1e-06	4.64333e-06	4.17157	5.98062	2.95693	1.3977	0.0732233	1.52907	1	4.36971	0.464938	0.878468	0.0275217
mmu-miR-873	Target	3.6e-07	2.301e-05	6.89e-06	6.52e-06	3.4e-07	4.4e-07	2.43333e-06	0.147945	9.45616	2.83151	2.67945	0.139726	0.180822	1	4.14521	0.83981	2.76617	0.337766
mmu-miR-547	Target	1.15e-05	3.6e-07	4.3e-07	4e-07	2.17e-06	4.4e-07	1.00333e-06	11.4618	0.358804	0.428571	0.398671	2.16279	0.438538	1	4.08306	0.581509	3.68942	0.455498
mmu-miR-125b-5p	Target	0.00340852	0.00667936	0.00180914	0.0008333	0.00175834	0.00045929	0.00101698	3.35162	6.56786	1.77894	0.819389	1.72899	0.451623	1	3.89947	0.37964	1.40932	0.117916
mmu-miR-499	Target	3.73e-06	3.6e-07	4.3e-07	4e-07	3.4e-07	4.4e-07	3.93333e-07	9.48305	0.915254	1.09322	1.01695	0.864407	1.11864	1	3.83051	0.0738796	2.82674	0.373475
mmu-miR-544	Target	0.00013069	0.00013862	2.762e-05	2.595e-05	3.082e-05	2.84e-05	2.839e-05	4.60338	4.88271	0.972878	0.914054	1.08559	1.00035	1	3.48632	0.0495194	1.25931	0.11978
mmu-miR-369-3p	Target	2.071e-05	7.987e-05	7.05e-06	6.5e-06	1.056e-05	1.438e-05	1.048e-05	1.97615	7.62118	0.67271	0.620229	1.00763	1.37214	1	3.42335	0.217091	2.13238	0.321418
mmu-miR-137	Target	3.938e-05	3.603e-05	1.399e-05	6.5e-06	1.308e-05	7.07e-06	8.88333e-06	4.43302	4.05591	1.57486	0.731707	1.47242	0.795872	1	3.3546	0.236935	0.896503	0.0640326
mmu-miR-665	Target	8.044e-05	7.438e-05	2.823e-05	2.55e-05	3.4e-07	2.901e-05	1.82833e-05	4.39964	4.06819	1.54403	1.39471	0.0185962	1.58669	1	3.33728	0.493821	0.901718	0.0854028
mmu-miR-194	Target	0.00032525	0.0001654	2.745e-05	2.635e-05	0.00010173	2.811e-05	5.20633e-05	6.2472	3.1769	0.527242	0.506114	1.95397	0.539919	1	3.31711	0.477083	1.6527	0.249227
rno-miR-743b	Target	0.00022286	9.45e-06	4.3e-07	4.596e-05	2.473e-05	4.4e-07	2.371e-05	9.39941	0.398566	0.0181358	1.93842	1.04302	0.0185576	1	3.27204	0.554635	3.06565	0.506235
mmu-miR-199a-3p	Target	0.0171324	0.0246347	0.00351844	0.00337164	0.0104456	0.00180593	0.00520773	3.2898	4.73041	0.675619	0.64743	2.00579	0.346779	1	2.89861	0.51033	1.18675	0.21558
mmu-miR-330	Target	1.898e-05	3.6e-07	6.78e-06	4e-07	8.24e-06	4.4e-07	3.02667e-06	6.27093	0.118943	2.24009	0.132159	2.72247	0.145374	1	2.87665	0.861242	1.80422	0.401039
mmu-miR-540-3p	Target	2.605e-05	8.11e-06	6.74e-06	6.41e-06	9.5e-07	6.93e-06	4.76333e-06	5.46886	1.70259	1.41498	1.3457	0.19944	1.45486	1	2.86214	0.401519	1.306	0.244601
mmu-miR-546	Target	6.422e-05	1.401e-05	2.711e-05	4e-07	3.601e-05	4.4e-07	1.22833e-05	5.22822	1.14057	2.20706	0.0325645	2.93161	0.0358209	1	2.85862	0.965808	1.22415	0.299153
mmu-miR-181a	Target	0.00053059	0.00124911	0.0002203	0.00020411	0.00038427	0.00011382	0.000234067	2.26683	5.33656	0.941185	0.872017	1.64171	0.486272	1	2.84819	0.33963	1.3017	0.241455
mmu-miR-491	Target	0.00015595	0.00011116	5.46e-05	5.213e-05	3.89e-06	5.726e-05	3.776e-05	4.13003	2.94386	1.44597	1.38056	0.103019	1.51642	1	2.83995	0.450202	0.77656	0.109714
mmu-miR-742	Target	3.09e-06	3.6e-07	4.3e-07	4e-07	5.6e-07	4.4e-07	4.66667e-07	6.62143	0.771429	0.921429	0.857143	1.2	0.942857	1	2.77143	0.103016	1.92549	0.410249
mmu-miR-218	Target	0.0183329	0.0177302	0.00362199	0.0016685	0.0109079	0.00183912	0.00480517	3.81524	3.68981	0.753769	0.34723	2.27003	0.382737	1	2.75294	0.635099	1.00024	0.213105
mmu-miR-383	Target	1.684e-05	4.3e-06	6.96e-06	6.42e-06	3.4e-07	3.62e-06	3.46e-06	4.86705	1.24277	2.01156	1.85549	0.0982659	1.04624	1	2.70713	0.507794	1.10253	0.232342
mmu-miR-30e	Target	0.0048384	0.00450752	0.00092319	0.00086256	0.00199696	0.00094018	0.00126657	3.82009	3.55885	0.728892	0.681022	1.57667	0.742306	1	2.70261	0.288878	0.989737	0.174009
mmu-miR-133b	Target	0.00201669	0.00116516	0.00044939	0.00021052	0.00092802	0.00022538	0.00045464	4.4358	2.56282	0.988452	0.463048	2.04122	0.495733	1	2.66236	0.520695	0.996406	0.21332
mmu-miR-684	Target	3.6e-07	2.34e-06	4.3e-07	4e-07	3.4e-07	4.4e-07	3.93333e-07	0.915254	5.94915	1.09322	1.01695	0.864407	1.11864	1	2.65254	0.0738796	1.64911	0.373438
mmu-miR-18b	Target	0.00025903	0.00021055	2.836e-05	5.157e-05	0.00011004	2.759e-05	6.30667e-05	4.10724	3.33853	0.449683	0.817706	1.74482	0.437474	1	2.63182	0.388249	1.11341	0.238603
mmu-miR-1	Target	0.00016932	0.0002944	5.531e-05	5.224e-05	0.00011714	2.794e-05	6.57733e-05	2.5743	4.47598	0.840918	0.794243	1.78096	0.424792	1	2.6304	0.404785	1.04973	0.220883
mmu-miR-674	Target	0.00186187	0.00083787	0.00021851	0.00020683	0.00070139	0.00022527	0.00037783	4.9278	2.21758	0.578329	0.547416	1.85636	0.596221	1	2.57457	0.428414	1.26821	0.304711
mmu-miR-338-3p	Target	3.6e-07	1.917e-05	4.3e-07	4e-07	3.4e-07	7.03e-06	2.59e-06	0.138996	7.40154	0.166023	0.15444	0.131274	2.71429	1	2.56885	0.857169	2.41636	0.573673
mmu-miR-872	Target	0.00133621	0.00133384	0.0004541	0.00020988	0.0007903	0.00022934	0.00040984	3.26032	3.25454	1.10799	0.512102	1.92831	0.559584	1	2.54095	0.464359	0.716481	0.145421
mmu-miR-467e	Target	4.651e-05	5.865e-05	0.00010418	2.586e-05	3.6e-07	5.617e-05	2.74633e-05	1.69353	2.13557	3.79342	0.941619	0.0131084	2.04527	1	2.54084	0.587361	0.639157	0.150549
mmu-miR-582-3p	Target	2.276e-05	1.552e-05	1.391e-05	4e-07	1.324e-05	7.06e-06	6.9e-06	3.29855	2.24928	2.01594	0.057971	1.91884	1.02319	1	2.52126	0.537312	0.394441	0.0845731
mmu-miR-214	Target	0.0042482	0.00603981	0.00176865	0.00164225	0.00224025	0.00090038	0.00159429	2.66463	3.78839	1.10936	1.03008	1.40517	0.564752	1	2.5208	0.243073	0.776706	0.135044
mmu-miR-450a-5p	Target	0.00018878	0.00024391	2.781e-05	2.578e-05	0.00013047	2.823e-05	6.14933e-05	3.06993	3.96645	0.452244	0.419232	2.12169	0.459074	1	2.49621	0.560965	1.05424	0.278488
mmu-miR-187	Target	2.14e-06	3.6e-07	4.3e-07	4e-07	3.4e-07	4.4e-07	3.93333e-07	5.44068	0.915254	1.09322	1.01695	0.864407	1.11864	1	2.48305	0.0738796	1.47971	0.373466
mmu-miR-369-5p	Target	0.0004127	0.00026062	2.789e-05	2.601e-05	0.00022878	2.829e-05	9.436e-05	4.37368	2.76198	0.29557	0.275646	2.42454	0.299809	1	2.47707	0.712306	1.18583	0.345781
mmu-miR-582-5p	Target	9.39e-06	0.00010721	1.409e-05	1.329e-05	2.559e-05	1.437e-05	1.775e-05	0.529014	6.04	0.793803	0.748732	1.44169	0.809577	1	2.45427	0.221542	1.79449	0.466305
mmu-miR-23b	Target	4.41e-05	0.00012247	5.43e-05	2.592e-05	3.598e-05	2.817e-05	3.00233e-05	1.46886	4.07916	1.80859	0.863329	1.1984	0.93827	1	2.4522	0.101532	0.819369	0.153415
mmu-miR-542-3p	Target	8.73e-05	9.344e-05	6.98e-06	2.561e-05	3.743e-05	1.447e-05	2.58367e-05	3.37892	3.61657	0.270159	0.991227	1.44872	0.560057	1	2.42188	0.256571	1.07805	0.268753
mmu-miR-125a-5p	Target	0.00574507	0.00713826	0.00177532	0.00168354	0.00347203	0.00090163	0.00201907	2.84541	3.53543	0.879278	0.833821	1.71962	0.446558	1	2.42004	0.376778	0.795715	0.182057
rno-miR-381	Target	0.00048015	0.00081414	5.532e-05	5.218e-05	0.00045491	5.576e-05	0.000187617	2.55921	4.33938	0.294857	0.27812	2.42468	0.297202	1	2.39781	0.71236	1.17034	0.365301
mmu-miR-146a	Target	0.00073985	0.0002925	0.00011204	0.00010468	0.00026231	0.00011453	0.000160507	4.60947	1.82235	0.69804	0.652185	1.63426	0.713553	1	2.37662	0.317626	1.16264	0.317103
mmu-miR-199a-5p	Target	5.248e-05	2.222e-05	9.516e-05	5.605e-05	1.62e-05	4.4e-07	2.423e-05	2.16591	0.917045	3.92736	2.31325	0.668593	0.0181593	1	2.33677	0.682942	0.873193	0.294314
mmu-miR-32	Target	8.724e-05	1.732e-05	6.95e-06	6.52e-06	3.415e-05	7.12e-06	1.593e-05	5.47646	1.08726	0.436284	0.409291	2.14375	0.446955	1	2.33333	0.57198	1.58276	0.472544
mmu-miR-135a	Target	0.00127255	0.00088894	0.00044743	0.00020378	0.00070789	0.00022879	0.000380153	3.34747	2.33837	1.17697	0.536047	1.86212	0.601836	1	2.2876	0.431477	0.627081	0.165986
mmu-miR-363	Target	0.00071175	0.0005809	0.00011071	0.00010388	0.00039837	0.00011305	0.0002051	3.47026	2.83228	0.539785	0.506485	1.94232	0.551195	1	2.28077	0.471337	0.889763	0.272292
mmu-miR-380-3p	Target	2.049e-05	3.6e-07	7.06e-06	6.6e-06	5.34e-06	4.4e-07	4.12667e-06	4.96527	0.0872375	1.71082	1.59935	1.29402	0.106624	1	2.25444	0.455301	1.43416	0.451348
mmu-miR-143	Target	0.0018151	0.00152537	0.00044211	0.00020633	0.00102906	0.00045434	0.000563243	3.22259	2.70819	0.784936	0.366325	1.82703	0.80665	1	2.23857	0.432608	0.741831	0.222685
mmu-miR-434-5p	Target	0.00044846	0.00044158	0.00022102	0.00021106	0.00017535	0.0001133	0.00016657	2.69232	2.65102	1.32689	1.26709	1.05271	0.680195	1	2.22341	0.171461	0.448419	0.0634171
mmu-miR-322	Target	0.00351607	0.00338451	0.00090698	0.00041052	0.0027039	0.00045838	0.00119093	2.95237	2.8419	0.761571	0.344704	2.2704	0.384891	1	2.18528	0.635308	0.712567	0.282223
mmu-miR-127	Target	0.0138604	0.0123825	0.00360046	0.00334348	0.00852579	0.00179331	0.00455419	3.04343	2.71893	0.790581	0.734154	1.87207	0.393771	1	2.18432	0.446972	0.703135	0.228239
mmu-miR-27b	Target	0.00081467	0.00074461	0.00022578	0.00021385	0.00048823	0.00011533	0.00027247	2.98994	2.73281	0.828642	0.784857	1.79187	0.423276	1	2.1838	0.409461	0.681633	0.210782
mmu-miR-328	Target	0.0025507	0.00190886	0.00044205	0.00041517	0.00139303	0.00045006	0.000752753	3.38849	2.53584	0.587244	0.551535	1.85058	0.597885	1	2.17053	0.4255	0.829023	0.277427
mmu-miR-30a	Target	0.00166757	0.00176367	0.00045571	0.0004269	0.00114268	0.0002279	0.00059916	2.78318	2.94357	0.760581	0.712497	1.90714	0.380366	1	2.16244	0.463591	0.702459	0.239373
mmu-miR-677	Target	3.7e-07	3.6e-07	3.61e-06	4e-07	1.17e-06	4.4e-07	6.7e-07	0.552239	0.537313	5.38806	0.597015	1.74627	0.656716	1	2.1592	0.373532	1.61443	0.522756
mmu-miR-34b-3p	Target	0.00140188	0.00153339	0.00022536	0.00020813	0.00115006	0.0001114	0.000489863	2.86178	3.13024	0.460047	0.424874	2.34772	0.22741	1	2.15069	0.676265	0.848866	0.348813
mmu-miR-7b	Target	1.014e-05	4.801e-05	6.91e-06	1.302e-05	1.033e-05	7.28e-06	1.021e-05	0.993144	4.70225	0.676787	1.27522	1.01175	0.713026	1	2.12406	0.162398	1.29233	0.436805
mmu-miR-683	Target	1.69e-06	3.6e-07	4.3e-07	4e-07	3.4e-07	4.4e-07	3.93333e-07	4.29661	0.915254	1.09322	1.01695	0.864407	1.11864	1	2.10169	0.0738796	1.09866	0.373685
mmu-miR-331-3p	Target	0.00667691	0.00981437	0.00182361	0.00166738	0.00526316	0.00179032	0.00290695	2.29688	3.37617	0.627327	0.573583	1.81054	0.615875	1	2.10012	0.405455	0.799598	0.287067
mmu-miR-29c	Target	0.00010193	9.513e-05	1.383e-05	6.54e-06	6.619e-05	2.839e-05	3.37067e-05	3.02403	2.82229	0.410305	0.194027	1.96371	0.842267	1	2.08554	0.516914	0.839641	0.332714
mmu-miR-296-3p	Target	0.00042839	0.00030835	0.00011102	5.216e-05	0.00024225	0.00011368	0.00013603	3.14923	2.26678	0.816143	0.383445	1.78086	0.835698	1	2.07738	0.411678	0.680129	0.246839
mmu-miR-708	Target	0.0041554	0.00445665	0.0009099	0.00085603	0.00281702	0.00092345	0.00153217	2.71211	2.90872	0.593865	0.558706	1.83859	0.602709	1	2.07157	0.419485	0.741027	0.276686
mmu-miR-188-5p	Target	0.00013146	0.00033684	5.651e-05	5.299e-05	0.00017295	2.873e-05	8.489e-05	1.54859	3.96796	0.665685	0.62422	2.03734	0.338438	1	2.06075	0.525191	0.98708	0.396493
mmu-miR-30b	Target	0.020028	0.0172735	0.00353816	0.0033218	0.0132387	0.00363134	0.0067306	2.97567	2.56642	0.525683	0.493537	1.96694	0.539527	1	2.02259	0.48365	0.757719	0.318815
mmu-miR-136	Target	0.00021801	0.00023911	0.00011249	5.146e-05	0.00020303	2.805e-05	9.418e-05	2.31482	2.53886	1.19441	0.546401	2.15577	0.297834	1	2.01603	0.582321	0.415869	0.22866
mmu-miR-652	Target	0.0125888	0.00573757	0.00178342	0.00166435	0.00745205	0.00089904	0.00333848	3.77083	1.71862	0.534201	0.498535	2.23217	0.269296	1	2.00788	0.619628	0.945462	0.422992
mmu-miR-139-5p	Target	0.0007705	0.0007746	0.00045361	0.00020802	0.00056942	0.00022938	0.000335607	2.29584	2.30806	1.35161	0.619833	1.69669	0.683479	1	1.98517	0.348828	0.316799	0.104747
mmu-miR-744	Target	0.0045579	0.0050964	0.00089084	0.00085018	0.00360577	0.00091824	0.0017914	2.54433	2.84493	0.497288	0.474591	2.01283	0.512583	1	1.96218	0.506532	0.73757	0.342753
mmu-miR-494	Target	0.00450208	0.00355537	0.00089117	0.00083236	0.00282592	0.00091034	0.00152287	2.95631	2.33465	0.58519	0.546572	1.85565	0.597778	1	1.95871	0.42808	0.709822	0.311811
mmu-miR-155	Target	0.00789914	0.0180915	5.609e-05	5.18e-05	0.0132559	0.00011371	0.0044738	1.76564	4.04387	0.0125374	0.0115785	2.963	0.0254169	1	1.94068	0.98151	1.16703	0.570693
mmu-miR-301b	Target	0.0087256	0.00846125	0.0017966	0.00166989	0.00630139	0.00182493	0.0032654	2.67214	2.59118	0.550192	0.511389	1.92974	0.558868	1	1.93784	0.465074	0.694215	0.324528
mmu-miR-672	Target	0.00097676	0.00078724	5.507e-05	0.00010568	0.00071986	0.00011482	0.000313453	3.11613	2.51151	0.175688	0.337147	2.29655	0.366307	1	1.93444	0.648328	0.89653	0.445897
mmu-miR-539	Target	0.00439475	0.00483053	0.00089727	0.00085838	0.00345784	0.00092292	0.00174638	2.51649	2.76602	0.513789	0.49152	1.98	0.528476	1	1.9321	0.490118	0.712806	0.341898
mmu-miR-329	Target	0.00017383	0.00015448	2.84e-05	2.636e-05	0.00013061	2.846e-05	6.181e-05	2.81233	2.49927	0.459473	0.426468	2.11309	0.460443	1	1.92369	0.556631	0.737666	0.374098
mmu-miR-134	Target	0.00404353	0.00398326	0.00350796	0.00169708	0.00252381	0.00181809	0.00201299	2.00872	1.97877	1.74266	0.843063	1.25376	0.903177	1	1.91005	0.128061	0.0841405	0.00403027
mmu-miR-453	Target	1.46e-06	3.6e-07	4.3e-07	4e-07	3.4e-07	4.4e-07	3.93333e-07	3.71186	0.915254	1.09322	1.01695	0.864407	1.11864	1	1.90678	0.0738796	0.904003	0.374013
mmu-miR-222	Target	0.00361644	0.00329993	0.00091327	0.00086025	0.00280129	0.0004642	0.00137525	2.62967	2.39952	0.664077	0.625524	2.03694	0.337539	1	1.89775	0.525091	0.620406	0.331331
mmu-miR-411	Target	0.00529269	0.00591228	0.00179465	0.00167197	0.00333045	0.0018718	0.00229141	2.3098	2.5802	0.783209	0.72967	1.45345	0.816878	1	1.89107	0.228119	0.559402	0.214245
mmu-miR-324-5p	Target	0.00050399	0.00054847	0.00022762	0.00010607	0.00046041	0.00011418	0.000226887	2.22133	2.41737	1.00323	0.467502	2.02925	0.503247	1	1.88065	0.514729	0.442342	0.264205
mmu-miR-202-3p	Target	0.00017998	1.539e-05	2.668e-05	5.382e-05	3.498e-05	2.964e-05	3.948e-05	4.55876	0.389818	0.675785	1.36322	0.886018	0.75076	1	1.87479	0.185761	1.34452	0.554346
mmu-miR-511	Target	1.41e-06	3.6e-07	4.3e-07	4e-07	3.4e-07	4.4e-07	3.93333e-07	3.58475	0.915254	1.09322	1.01695	0.864407	1.11864	1	1.86441	0.0738796	0.861702	0.374128
mmu-miR-532-3p	Target	0.00099954	0.00104813	0.00044409	0.0004189	0.00069791	0.00022479	0.0004472	2.23511	2.34376	0.993046	0.936717	1.56062	0.502661	1	1.8573	0.307042	0.433266	0.181738
mmu-miR-455	Target	0.00041834	9.577e-05	0.00010559	0.00020339	7.83e-05	5.667e-05	0.000112787	3.70913	0.849125	0.936192	1.80332	0.694231	0.502453	1	1.83148	0.405455	0.939159	0.461923
mmu-miR-384-5p	Target	0.00153634	0.00190187	0.00022429	0.00042077	0.00135162	0.0002277	0.000666697	2.30441	2.85268	0.33642	0.631127	2.02734	0.341535	1	1.83117	0.520428	0.763949	0.419398
mmu-miR-186	Target	0.00406842	0.00507873	0.00090364	0.00084813	0.00372132	0.00092582	0.00183176	2.22105	2.7726	0.493319	0.463015	2.03156	0.505427	1	1.82899	0.515924	0.686553	0.389062
mmu-miR-361	Target	0.00017353	8.832e-05	2.746e-05	5.274e-05	7.788e-05	2.831e-05	5.29767e-05	3.27559	1.66715	0.518341	0.995533	1.47008	0.534386	1	1.82036	0.270121	0.799628	0.386105
mmu-miR-574-3p	Target	0.00106397	0.00141975	0.00044652	0.00041534	0.00074064	0.00045465	0.000536877	1.98178	2.64446	0.831699	0.773623	1.37953	0.846843	1	1.81931	0.190941	0.529567	0.219253
rno-miR-1	Target	0.00018445	0.00038184	0.00011062	5.177e-05	0.00026562	5.789e-05	0.000125093	1.4745	3.05244	0.8843	0.413851	2.12337	0.462774	1	1.80375	0.561865	0.647176	0.401438
mmu-miR-126-3p	Target	0.0609342	0.0583568	0.0142866	0.0132094	0.0464441	0.0146151	0.0247562	2.46137	2.35726	0.577092	0.53358	1.87606	0.590362	1	1.79857	0.438336	0.611479	0.348334
mmu-miR-140	Target	0.00550082	0.00515914	0.00182714	0.00169077	0.00434286	0.00091217	0.00231527	2.37589	2.22831	0.78917	0.73027	1.87575	0.393981	1	1.79779	0.448507	0.506107	0.303474
mmu-miR-19a	Target	0.193106	0.152228	0.0573167	0.0536746	0.112486	0.0578977	0.074686	2.58557	2.03825	0.767436	0.71867	1.50612	0.775214	1	1.79708	0.253584	0.538523	0.251571
mmu-miR-221	Target	0.00174003	0.00076345	0.00044785	0.0002059	0.00098616	0.00045202	0.000548027	3.17508	1.39309	0.817205	0.375712	1.79947	0.824814	1	1.79513	0.420235	0.709723	0.389629
mmu-miR-337-5p	Target	0.00102655	0.00133484	0.00044964	0.00041989	0.00092787	0.00022423	0.000523997	1.95908	2.54742	0.858097	0.801322	1.77076	0.427923	1	1.7882	0.400169	0.495094	0.283364
mmu-miR-320	Target	0.00218539	0.0012912	0.00045073	0.00020916	0.00176587	0.00022457	0.0007332	2.98062	1.76105	0.614744	0.28527	2.40844	0.306288	1	1.78547	0.704247	0.683079	0.468217
mmu-miR-107	Target	0.00017783	0.00015596	5.407e-05	9.944e-05	8.958e-05	2.869e-05	7.257e-05	2.45046	2.1491	0.745074	1.37026	1.23439	0.395342	1	1.78154	0.304862	0.525487	0.267693
rno-miR-758	Target	0.00178098	0.00258972	0.00044801	0.00042173	0.00184276	0.00045894	0.00090781	1.96184	2.85271	0.493506	0.464558	2.0299	0.505546	1	1.76935	0.515084	0.687811	0.421221
mmu-miR-142-3p	Target	0.00107148	0.00140435	0.00044902	0.00041971	0.00100701	0.00023127	0.000552663	1.93876	2.54106	0.812466	0.759432	1.8221	0.418465	1	1.76409	0.422672	0.506586	0.311245
mmu-miR-362-3p	Target	0.00019043	8.516e-05	2.778e-05	5.336e-05	0.00010483	1.439e-05	5.75267e-05	3.31029	1.48036	0.482906	0.92757	1.82229	0.250145	1	1.75785	0.455281	0.827905	0.46744
mmu-miR-379	Target	0.00501911	0.00369059	0.00089513	0.00084377	0.0037338	0.00091839	0.00183199	2.73971	2.01453	0.488612	0.460576	2.03812	0.501308	1	1.74762	0.519191	0.663398	0.424966
mmu-miR-466h	Target	3.6e-07	1.27e-06	4.3e-07	4e-07	3.4e-07	4.4e-07	3.93333e-07	0.915254	3.22881	1.09322	1.01695	0.864407	1.11864	1	1.74576	0.0738796	0.743303	0.374593
mmu-miR-487b	Target	0.00115614	0.00156984	0.00044232	0.00041961	0.00094219	0.0004547	0.0006055	1.9094	2.59263	0.730504	0.692998	1.55605	0.75095	1	1.74418	0.278529	0.543861	0.290189
mmu-miR-15b	Target	0.00760062	0.00678656	0.00179838	0.00167747	0.00582494	0.00181416	0.00310552	2.44745	2.18532	0.579091	0.540157	1.87567	0.584172	1	1.73729	0.43802	0.584021	0.369654
mmu-miR-376c	Target	0.00322599	0.00291978	0.00090126	0.00084663	0.00229242	0.00091903	0.00135269	2.38486	2.15849	0.666271	0.625885	1.69471	0.679408	1	1.73654	0.347697	0.539111	0.314905
mmu-miR-676	Target	0.00052228	0.00037237	0.0002207	0.00020502	0.00038175	5.638e-05	0.000214383	2.4362	1.73694	1.02946	0.956324	1.78069	0.262987	1	1.7342	0.438667	0.406091	0.286693
mmu-miR-370	Target	0.00287567	0.00265888	0.00183814	0.00169007	0.00166583	0.00091127	0.00142239	2.02172	1.8693	1.29229	1.18819	1.17115	0.640661	1	1.72777	0.179737	0.222141	0.0635143
mmu-miR-130a	Target	0.00827152	0.00651036	0.00180009	0.0017181	0.0060946	0.00180376	0.00320549	2.58043	2.03101	0.561565	0.535987	1.9013	0.56271	1	1.72433	0.450717	0.602629	0.390293
mmu-miR-30c	Target	0.0163825	0.0242137	0.00724619	0.0068674	0.013542	0.00734242	0.00925061	1.77096	2.61752	0.78332	0.742372	1.46391	0.793723	1	1.72393	0.232426	0.53001	0.279146
U87	Candidate Control	0.0058508	0.0043448	0.00362383	0.00162274	0.0046453	0.00179514	0.00268773	2.17686	1.61653	1.34829	0.603759	1.72834	0.667903	1	1.71389	0.364639	0.244091	0.17908
mmu-miR-503	Target	0.00099491	0.00119173	0.00044664	0.00041676	0.00090319	0.00022775	0.0005159	1.92849	2.31	0.865749	0.807831	1.75071	0.441462	1	1.70142	0.389969	0.432103	0.294595
mmu-miR-18a	Target	0.0180515	0.017811	0.00353494	0.00333718	0.0162644	0.0036065	0.00773604	2.33343	2.30235	0.456945	0.431381	2.10242	0.466195	1	1.69757	0.551304	0.620379	0.447931
mmu-miR-467c	Target	0.0004821	0.00025628	0.00022274	0.00010268	0.0003529	0.0001109	0.000188827	2.55314	1.35722	1.1796	0.543779	1.86891	0.587311	1	1.69665	0.434637	0.4313	0.318754
mmu-miR-106a	Target	0.357009	0.363057	0.0572901	0.108764	0.294609	0.058353	0.153909	2.31962	2.35892	0.372234	0.70668	1.91418	0.379141	1	1.68359	0.466767	0.655776	0.44358
mmu-miR-126-5p	Target	0.00693098	0.00686225	0.00181072	0.00166243	0.00586415	0.00183843	0.00312167	2.22028	2.19826	0.580048	0.532545	1.87853	0.588925	1	1.6662	0.439566	0.543111	0.394343
mmu-miR-133a	Target	0.00081725	0.00113657	0.00044207	0.0004323	0.00055966	0.00044994	0.000480633	1.70036	2.36473	0.919766	0.899438	1.16442	0.93614	1	1.66162	0.0828909	0.417576	0.195126
mmu-miR-16	Target	0.0483419	0.0574086	0.0144659	0.0133904	0.0443215	0.0147998	0.0241706	2.00003	2.37515	0.598492	0.553997	1.8337	0.612306	1	1.65789	0.417188	0.540654	0.389914
mmu-miR-350	Target	0.00023079	4.654e-05	5.633e-05	5.23e-05	9.285e-05	5.638e-05	6.71767e-05	3.43557	0.6928	0.838535	0.778544	1.38218	0.83928	1	1.65563	0.191891	0.890961	0.511696
mmu-miR-376a	Target	0.00050375	0.00035787	0.00022003	0.00020803	0.00022259	0.00022648	0.000219033	2.29988	1.63386	1.00455	0.949764	1.01624	1.034	1	1.6461	0.0256358	0.373979	0.159878
mmu-miR-130b	Target	0.00673038	0.00634863	0.00179542	0.00168644	0.00554812	0.00181795	0.0030175	2.23045	2.10393	0.595002	0.558886	1.83865	0.602468	1	1.64313	0.419512	0.525334	0.392926
snoRNA202	Candidate Control	0.275542	0.228917	0.0576561	0.0538588	0.230624	0.0578203	0.114101	2.4149	2.00627	0.505308	0.472028	2.02122	0.506747	1	1.64216	0.510711	0.580537	0.452943
mmu-miR-182	Target	0.00492274	0.00508696	0.00178247	0.00167539	0.00379307	0.00183445	0.0024343	2.02224	2.0897	0.73223	0.688242	1.55817	0.753583	1	1.61472	0.279724	0.441676	0.304872
mmu-miR-101a	Target	0.00051504	0.00052314	0.00010927	0.00021151	0.00038836	0.00011218	0.00023735	2.16996	2.20409	0.460375	0.891131	1.63623	0.472635	1	1.61147	0.340284	0.575634	0.412224
mmu-miR-495	Target	0.00478095	0.00371425	0.00088808	0.00084067	0.00411397	0.00089802	0.00195089	2.45065	1.90388	0.455219	0.430917	2.10877	0.460314	1	1.60325	0.55445	0.595322	0.499549
mmu-miR-382	Target	0.00553112	0.00376066	0.00175712	0.00167556	0.00341117	0.00181782	0.00230152	2.40325	1.63399	0.763462	0.728024	1.48214	0.789836	1	1.60023	0.241729	0.473667	0.322126
mmu-miR-152	Target	0.00098187	0.00085669	0.00022335	0.000212	0.00084642	0.00023069	0.000429703	2.285	1.99368	0.519777	0.493364	1.96978	0.536859	1	1.59948	0.485051	0.546364	0.457999
mmu-miR-148a	Target	0.0008359	0.00072104	0.00045209	0.00042968	0.00059865	0.00022908	0.000419137	1.99434	1.7203	1.07862	1.02515	1.42829	0.546552	1	1.59775	0.254847	0.271353	0.183606
mmu-miR-153	Target	3.6e-07	1.47e-05	7.04e-06	6.54e-06	3.4e-07	7.01e-06	4.63e-06	0.0777538	3.17495	1.52052	1.41253	0.0734341	1.51404	1	1.59107	0.464209	0.894778	0.589123
mmu-miR-489	Target	4.681e-05	3.023e-05	6.84e-06	1.312e-05	3.357e-05	6.99e-06	1.78933e-05	2.61606	1.68946	0.382265	0.733234	1.87612	0.390648	1	1.56259	0.449083	0.647953	0.514889
rno-miR-339-3p	Target	3.6e-07	2.38e-06	4.3e-07	4e-07	1.19e-06	4.4e-07	6.76667e-07	0.53202	3.51724	0.635468	0.591133	1.75862	0.650246	1	1.56158	0.379694	0.978288	0.620915
mmu-miR-223	Target	0.00015618	0.00019063	0.00011173	5.218e-05	0.00018657	5.731e-05	9.86867e-05	1.58258	1.93167	1.13217	0.528744	1.89053	0.580727	1	1.54881	0.445517	0.231413	0.335739
mmu-miR-17	Target	0.76849	0.760966	0.231955	0.215776	0.686738	0.236739	0.379751	2.02367	2.00386	0.610808	0.568204	1.80839	0.623406	1	1.54611	0.404509	0.467686	0.427027
mmu-miR-148b	Target	0.00024599	0.00017692	0.00011326	0.00010472	0.00012888	0.00011327	0.000115623	2.12751	1.53014	0.97956	0.9057	1.11465	0.979647	1	1.54574	0.0611724	0.331477	0.18075
mmu-miR-342-3p	Target	0.0046149	0.0061357	0.00357684	0.00339493	0.00407952	0.00180261	0.00309235	1.49236	1.98415	1.15667	1.09785	1.31923	0.582925	1	1.54439	0.21811	0.240286	0.168735
mmu-miR-190	Target	1.839e-05	4.338e-05	1.397e-05	2.604e-05	1.595e-05	7.1e-06	1.63633e-05	1.12385	2.65105	0.853738	1.59136	0.97474	0.433897	1	1.54288	0.33437	0.559544	0.45177
mmu-miR-431	Target	0.00796523	0.00729051	0.00355997	0.00333669	0.00521378	0.00365437	0.00406828	1.95789	1.79204	0.875055	0.820172	1.28157	0.898259	1	1.54166	0.142578	0.336723	0.212647
mmu-miR-10b	Target	0.0402798	0.0412031	0.0145439	0.0136142	0.0414726	0.00721339	0.0207668	1.93963	1.98409	0.700347	0.655579	1.99707	0.347353	1	1.54135	0.506412	0.4207	0.457111
mmu-miR-484	Target	0.034	0.0319579	0.0144615	0.0134479	0.0315141	0.00727436	0.0174121	1.95267	1.83538	0.830543	0.772329	1.8099	0.417776	1	1.53953	0.417682	0.356107	0.381277
mmu-miR-351	Target	0.00062994	0.00077235	0.00044969	0.00041977	0.00055811	0.00023133	0.00040307	1.56286	1.91617	1.11566	1.04143	1.38465	0.57392	1	1.53156	0.234952	0.231615	0.182432
mmu-miR-20b	Target	0.0381389	0.0296751	0.00724379	0.00675557	0.0349414	0.00737899	0.0163586	2.33142	1.81403	0.442811	0.412966	2.13596	0.451076	1	1.52942	0.568085	0.563461	0.544356
mmu-miR-667	Target	0.00185156	0.00129087	0.00089655	0.00084227	0.0008788	0.00092469	0.00088192	2.09946	1.4637	1.01659	0.955041	0.996462	1.0485	1	1.52659	0.0270361	0.314177	0.170259
mmu-miR-340-3p	Target	0.00076466	0.0006837	0.00011123	0.00021438	0.00069426	0.00011307	0.00034057	2.24524	2.00752	0.3266	0.629474	2.03852	0.332002	1	1.52645	0.526315	0.603838	0.546928
mmu-miR-93	Target	0.0609558	0.0461022	0.007147	0.00672069	0.0608183	0.00729601	0.024945	2.44361	1.84816	0.28651	0.26942	2.4381	0.292484	1	1.52609	0.719079	0.643185	0.614524
mmu-miR-132	Target	0.00094503	0.00037151	0.00022049	0.00020008	0.00058389	0.00022339	0.000335787	2.81438	1.10639	0.656637	0.595855	1.73887	0.665274	1	1.5258	0.369979	0.657239	0.524106
mmu-miR-335-3p	Target	0.0249834	0.024004	0.00716105	0.00671136	0.0228105	0.00731794	0.0122799	2.03449	1.95474	0.58315	0.54653	1.85754	0.595926	1	1.52412	0.429009	0.47105	0.45693
mmu-miR-335-5p	Target	0.00948788	0.00785603	0.00357581	0.00336204	0.00677417	0.0036609	0.00459904	2.06301	1.70819	0.777513	0.731031	1.47295	0.796015	1	1.51624	0.23722	0.383303	0.315975
mmu-miR-191	Target	0.0135647	0.0148018	0.00717294	0.00666914	0.0131733	0.00363091	0.00782446	1.73362	1.89173	0.916733	0.852345	1.68361	0.464046	1	1.51403	0.359715	0.302115	0.335318
mmu-miR-125b-3p	Target	9.9e-07	3.6e-07	4.3e-07	4e-07	3.4e-07	4.4e-07	3.93333e-07	2.51695	0.915254	1.09322	1.01695	0.864407	1.11864	1	1.50847	0.0738796	0.506848	0.377038
mmu-miR-29a	Target	0.0011534	0.00091256	0.00023164	0.00021534	0.0010786	0.00023352	0.000509153	2.26533	1.79231	0.454951	0.422937	2.11842	0.458644	1	1.5042	0.559304	0.542102	0.552704
mmu-miR-34c	Target	0.00016805	3.659e-05	2.735e-05	1.302e-05	0.00013437	7.02e-06	5.147e-05	3.26501	0.7109	0.531378	0.252963	2.61065	0.13639	1	1.50243	0.806026	0.882812	0.695867
mmu-miR-367	Target	0.00154009	0.00194256	0.00045005	0.00041742	0.00174829	0.00045603	0.000873913	1.76229	2.22283	0.514982	0.477645	2.00053	0.521825	1	1.50003	0.500428	0.510153	0.522658
mmu-miR-384-3p	Target	6.33e-05	3.8e-07	1.358e-05	6.35e-06	3.133e-05	1.402e-05	1.72333e-05	3.67311	0.0220503	0.788008	0.368472	1.81799	0.81354	1	1.49439	0.4287	1.11158	0.699453
mmu-miR-615-5p	Target	0.00010901	6.853e-05	2.753e-05	6.55e-06	7.344e-05	5.729e-05	4.576e-05	2.38221	1.4976	0.601617	0.143138	1.6049	1.25197	1	1.49381	0.440378	0.514017	0.506089
mmu-miR-192	Target	0.00038273	0.00034521	0.00011101	0.00010512	0.00034549	0.00011243	0.00018768	2.03927	1.83935	0.591486	0.560102	1.84085	0.599052	1	1.49004	0.420573	0.452967	0.472266
mmu-miR-193b	Target	0.00133001	0.00114776	0.00044636	0.00041585	0.00132449	0.00022376	0.0006547	2.03148	1.75311	0.681778	0.635176	2.02305	0.341775	1	1.48879	0.518489	0.411429	0.501213
Y1	Candidate Control	0.00423601	0.00305671	0.00177335	0.00166316	0.00260413	0.00182728	0.00203152	2.08514	1.50464	0.872916	0.818676	1.28186	0.899463	1	1.48757	0.142847	0.350043	0.266695
mmu-miR-340-5p	Target	0.00166393	0.00181379	0.00044018	0.00041838	0.00177335	0.00045042	0.000880717	1.88929	2.05945	0.499798	0.475045	2.01353	0.511424	1	1.48285	0.506874	0.493972	0.532563
mmu-miR-434-3p	Target	0.00262442	0.00254982	0.00179495	0.00166252	0.00218045	0.00087958	0.00157418	1.66716	1.61977	1.14024	1.05612	1.38513	0.558753	1	1.47573	0.240199	0.168299	0.180118
mmu-miR-26b	Target	0.003505	0.00333406	0.00088965	0.00168441	0.00265791	0.00090434	0.00174889	2.00413	1.90639	0.508695	0.963133	1.51977	0.517095	1	1.47307	0.290035	0.483013	0.448348
mmu-miR-92a	Target	0.0787902	0.0791697	0.0143925	0.01333	0.075131	0.0293791	0.03928	2.00586	2.01552	0.366406	0.339358	1.9127	0.74794	1	1.46259	0.471347	0.548101	0.557041
mmu-miR-138	Target	0.00089563	0.00093041	0.00022055	0.00020691	0.00096772	0.00022556	0.00046673	1.91895	1.99347	0.472543	0.443318	2.0734	0.483277	1	1.46165	0.536826	0.495022	0.561586
rno-miR-421	Target	3.6e-07	9.2e-07	4.3e-07	4e-07	3.4e-07	4.4e-07	3.93333e-07	0.915254	2.33898	1.09322	1.01695	0.864407	1.11864	1	1.44915	0.0738796	0.447872	0.378438
mmu-miR-486	Target	0.00072285	0.00100013	0.00044322	0.00042063	0.00061807	0.00045639	0.000498363	1.45045	2.00683	0.889351	0.844023	1.2402	0.915778	1	1.44888	0.121873	0.322589	0.262929
mmu-miR-25	Target	0.00426451	0.00264174	0.00090502	0.00085168	0.00362038	0.00093471	0.00180226	2.36621	1.4658	0.502159	0.472563	2.0088	0.518633	1	1.44472	0.504577	0.538207	0.579143
mmu-miR-410	Target	0.00101396	0.00110555	0.00044606	0.00041814	0.00090487	0.00045665	0.00059322	1.70925	1.86364	0.75193	0.704865	1.52535	0.769782	1	1.44161	0.263344	0.347707	0.368589
rno-miR-196c	Target	0.00089788	0.00106095	0.00021899	0.00020784	0.00107533	0.00022906	0.000504077	1.78124	2.10474	0.434438	0.412318	2.13327	0.454415	1	1.44014	0.566764	0.511448	0.59514
mmu-miR-224	Target	0.00032857	4.709e-05	5.574e-05	5.282e-05	0.00019108	5.67e-05	0.0001002	3.27914	0.46996	0.556287	0.527146	1.90699	0.565868	1	1.43513	0.453631	0.922343	0.693821
mmu-miR-141	Target	6.272e-05	2.672e-05	1.387e-05	1.323e-05	4.488e-05	1.421e-05	2.41067e-05	2.60177	1.10841	0.57536	0.548811	1.86173	0.589463	1	1.42851	0.431023	0.606475	0.595516
mmu-miR-293	Target	0.00227613	0.00115905	0.00045925	0.00041926	0.0014147	0.00092023	0.000918063	2.47927	1.26249	0.500238	0.456679	1.54096	1.00236	1	1.414	0.313008	0.576299	0.562134
mmu-miR-467a	Target	0.00159342	0.00146948	0.00044933	0.00041888	0.00161458	0.00045549	0.00082965	1.92059	1.7712	0.54159	0.504888	1.9461	0.549015	1	1.41113	0.47322	0.436903	0.557972
mmu-miR-106b	Target	0.011991	0.0118887	0.00358183	0.0033491	0.0124892	0.00362769	0.00648867	1.848	1.83222	0.552013	0.516146	1.92477	0.559081	1	1.41074	0.462553	0.429389	0.550668
rno-miR-346	Target	3.6e-07	8.7e-07	4.3e-07	4e-07	3.4e-07	4.4e-07	3.93333e-07	0.915254	2.21186	1.09322	1.01695	0.864407	1.11864	1	1.40678	0.0738796	0.405807	0.379873
mmu-miR-27a	Target	0.00030055	0.00044136	0.00011149	0.00010408	0.00044778	5.578e-05	0.000202547	1.48386	2.17905	0.550441	0.513857	2.21075	0.275393	1	1.40445	0.609276	0.471813	0.627432
snoRNA135	Candidate Control	0.0315067	0.0301133	0.0143985	0.0133072	0.0264795	0.0144736	0.0180867	1.74198	1.66494	0.796083	0.735742	1.46403	0.800231	1	1.401	0.232759	0.303275	0.353409
mmu-miR-216b	Target	0.00016105	9.871e-05	5.583e-05	5.274e-05	0.00014391	2.862e-05	7.509e-05	2.14476	1.31456	0.743508	0.702357	1.9165	0.381143	1	1.40094	0.467538	0.406806	0.552919
mmu-miR-292-3p	Target	0.00285473	0.00143856	0.00045786	0.00042783	0.00252351	0.00045278	0.00113471	2.51583	1.26778	0.403505	0.37704	2.22393	0.399028	1	1.39571	0.611999	0.613121	0.671533
mmu-miR-294	Target	0.00014778	0.0001009	7e-06	1.28e-05	0.00014451	2.8e-05	6.177e-05	2.39242	1.63348	0.113324	0.20722	2.33949	0.453294	1	1.37974	0.673499	0.67004	0.70979
mmu-miR-298	Target	0.00261368	0.00194693	0.00089344	0.0008458	0.00219571	0.00091792	0.00131981	1.98035	1.47516	0.676946	0.64085	1.66366	0.695494	1	1.37748	0.332203	0.379415	0.49575
mmu-miR-323-3p	Target	0.00605746	0.00606529	0.0017794	0.00339471	0.00493924	0.00178732	0.00337376	1.79546	1.79779	0.527424	1.00621	1.46402	0.529771	1	1.37356	0.269712	0.423067	0.497911
mmu-miR-216a	Target	8.3e-07	3.6e-07	4.3e-07	4e-07	3.4e-07	4.4e-07	3.93333e-07	2.11017	0.915254	1.09322	1.01695	0.864407	1.11864	1	1.37288	0.0738796	0.372207	0.381418
mmu-miR-297b-5p	Target	1.33e-06	1.608e-05	2.762e-05	2.58e-05	3.4e-07	6.8e-06	1.098e-05	0.121129	1.46448	2.51548	2.34973	0.0309654	0.619308	1	1.36703	0.695907	0.692906	0.727562
mmu-miR-128a	Target	0.00018193	0.00015591	5.592e-05	2.623e-05	0.00020483	5.753e-05	9.61967e-05	1.89123	1.62074	0.581309	0.272671	2.12928	0.598046	1	1.36443	0.572401	0.399269	0.629129
mmu-miR-195	Target	0.00070942	0.00099139	0.00022351	0.00020524	0.00098015	0.00022758	0.00047099	1.50623	2.10491	0.474554	0.435763	2.08104	0.483195	1	1.3619	0.540694	0.476143	0.641839
mmu-miR-200c	Target	0.00192134	0.00132526	0.00090837	0.00083525	0.00132559	0.00091597	0.0010256	1.87338	1.29218	0.885693	0.814399	1.2925	0.893104	1	1.35041	0.148003	0.286602	0.338409
mmu-miR-493	Target	2.031e-05	8.409e-05	6.95e-06	2.6e-05	2.793e-05	2.855e-05	2.74933e-05	0.738725	3.05856	0.252789	0.945684	1.01588	1.03843	1	1.35002	0.0279274	0.865708	0.706805
mmu-miR-19b	Target	0.96546	0.879467	0.455655	0.428933	0.814172	0.465787	0.569631	1.69489	1.54393	0.799913	0.753002	1.4293	0.8177	1	1.34624	0.21546	0.276619	0.379307
rno-miR-351	Target	0.00044272	0.00033341	0.00021968	0.00021221	0.00041558	0.00011233	0.000246707	1.79452	1.35144	0.89045	0.860171	1.68451	0.455318	1	1.34547	0.361659	0.260999	0.481819
mmu-miR-20a	Target	0.232224	0.211406	0.0573485	0.0538572	0.260354	0.0586506	0.124287	1.86844	1.70094	0.461419	0.433329	2.09478	0.471896	1	1.3436	0.547501	0.443734	0.651377
mmu-miR-196b	Target	0.00569656	0.00381521	0.00089427	0.00167557	0.00518678	0.00091802	0.00259346	2.19651	1.47109	0.344818	0.646076	1.99995	0.353975	1	1.33747	0.507035	0.538697	0.671931
mmu-miR-200a	Target	0.00053939	0.00034132	0.00044773	0.00019991	0.00033974	0.00045814	0.000332597	1.62175	1.02623	1.34617	0.601058	1.02148	1.37746	1	1.33138	0.224386	0.172072	0.306267
mmu-miR-301a	Target	0.00508757	0.00345872	0.00354649	0.0033295	0.00396253	0.00179157	0.00302787	1.68025	1.1423	1.17128	1.09962	1.30869	0.591694	1	1.33128	0.212887	0.174687	0.295324
mmu-miR-24	Target	0.0133534	0.0127324	0.00706455	0.00662007	0.0110549	0.00738691	0.00835398	1.59845	1.52412	0.845651	0.792445	1.32332	0.884239	1	1.32274	0.163815	0.239507	0.328374
rno-miR-219-2-3p	Target	0.00055508	0.00052658	0.00022484	0.00020374	0.00067464	0.00011472	0.000331033	1.67681	1.59072	0.679207	0.615467	2.03798	0.346551	1	1.31558	0.524765	0.319155	0.634469
mmu-miR-345-5p	Target	0.00018244	0.00019377	5.563e-05	0.00010329	0.00016977	5.663e-05	0.000109897	1.6601	1.7632	0.506203	0.939883	1.54481	0.515302	1	1.30984	0.298711	0.402918	0.570183
mmu-miR-295	Target	0.00177847	0.0008231	0.00022142	0.00020854	0.001499	0.0004534	0.000720313	2.46902	1.1427	0.307394	0.289513	2.08104	0.629448	1	1.30637	0.549355	0.629352	0.732389
mmu-miR-208b	Target	3.6e-07	7.5e-07	4.3e-07	4e-07	3.4e-07	4.4e-07	3.93333e-07	0.915254	1.90678	1.09322	1.01695	0.864407	1.11864	1	1.30508	0.0738796	0.305202	0.386288
mmu-miR-365	Target	4.983e-05	8.428e-05	2.812e-05	2.588e-05	8.436e-05	1.419e-05	4.14767e-05	1.2014	2.03199	0.677972	0.623965	2.03391	0.34212	1	1.30379	0.523321	0.394208	0.666996
mmu-miR-433	Target	0.00147351	0.00158672	0.00044698	0.00041441	0.00182881	0.00044899	0.000897403	1.64197	1.76812	0.498082	0.461788	2.03789	0.500321	1	1.30273	0.519065	0.403967	0.669242
mmu-miR-344	Target	0.00015745	7.804e-05	4.3e-07	0.00011484	8.49e-06	5.89e-05	6.07433e-05	2.59205	1.28475	0.00707897	1.89058	0.139768	0.969654	1	1.29463	0.505643	0.746234	0.760168
mmu-miR-409-3p	Target	0.0169558	0.0171404	0.00717406	0.00682831	0.0177447	0.00740255	0.0106585	1.59082	1.60814	0.673083	0.640644	1.66484	0.694521	1	1.29068	0.332781	0.30884	0.556843
mmu-miR-543	Target	0.00118067	0.00105938	0.00045063	0.0004167	0.00121046	0.00046106	0.000696073	1.69619	1.52194	0.647389	0.598644	1.73898	0.662373	1	1.2885	0.369949	0.32448	0.589172
mmu-miR-675-3p	Target	0.00030568	0.00023758	0.00011228	0.00010562	0.00028984	0.00011394	0.0001698	1.80024	1.39918	0.661249	0.622026	1.70695	0.671025	1	1.28689	0.353758	0.333556	0.586883
mmu-miR-337-3p	Target	0.00073525	0.000779	0.00021488	0.00020671	0.00069018	0.00045368	0.00045019	1.6332	1.73038	0.47731	0.459162	1.53309	1.00775	1	1.2803	0.310039	0.402472	0.610514
mmu-miR-377	Target	6.8e-07	4e-07	4.3e-07	4e-07	3.4e-07	4.4e-07	3.93333e-07	1.72881	1.01695	1.09322	1.01695	0.864407	1.11864	1	1.27966	0.0738796	0.225653	0.304158
mmu-miR-467b	Target	0.00014925	0.00017854	0.00011292	0.00010528	0.00012558	0.000114	0.000114953	1.29835	1.55315	0.982312	0.91585	1.09244	0.991707	1	1.27794	0.0511465	0.165103	0.183108
mmu-miR-205	Target	0.00029246	0.00039115	0.00022057	0.00010323	0.00049258	0.00011282	0.00023621	1.23814	1.65594	0.933788	0.437026	2.08535	0.477626	1	1.27596	0.5428	0.209324	0.65999
mmu-miR-103	Target	0.00189334	0.00147787	0.00089796	0.00083188	0.00162749	0.00089794	0.0011191	1.69184	1.32058	0.802392	0.743345	1.45428	0.802375	1	1.2716	0.227778	0.257926	0.474087
mmu-miR-28	Target	0.00137312	0.00097705	0.00045681	0.00041981	0.00132696	0.00046753	0.0007381	1.86034	1.32374	0.6189	0.568771	1.79781	0.633424	1	1.26766	0.399339	0.359469	0.644517
mmu-miR-145	Target	0.00385397	0.00293661	0.00177268	0.00166066	0.00332231	0.00178979	0.00225759	1.70712	1.30077	0.78521	0.735591	1.47162	0.792789	1	1.26437	0.236387	0.266754	0.49944
mmu-miR-451	Target	8.468e-05	0.00014875	2.772e-05	1.317e-05	0.00018048	1.439e-05	6.93467e-05	1.22111	2.14502	0.399731	0.189915	2.60258	0.207508	1	1.25529	0.801304	0.504111	0.800759
mmu-miR-429	Target	0.00112411	0.00129601	0.00044235	0.00041628	0.00096084	0.00090639	0.00076117	1.47682	1.70266	0.581145	0.546895	1.26232	1.19079	1	1.25354	0.227492	0.34246	0.570812
rno-miR-466b	Target	7.943e-05	3.6e-07	4.3e-07	2.772e-05	3.629e-05	4.4e-07	2.14833e-05	3.69728	0.0167572	0.0200155	1.2903	1.68922	0.020481	1	1.24469	0.503116	1.2263	0.862525
mmu-miR-598	Target	3.6e-07	5.083e-05	4.3e-07	4e-07	3.427e-05	6.96e-06	1.38767e-05	0.0259428	3.66298	0.0309873	0.0288254	2.46961	0.501561	1	1.23997	0.747371	1.21151	0.874308
mmu-miR-200b	Target	0.00332224	0.00128326	0.00044067	0.00083644	0.00233304	0.00090293	0.00135747	2.44738	0.945332	0.324626	0.616176	1.71867	0.665157	1	1.23911	0.359612	0.630145	0.758264
mmu-miR-26a	Target	0.0105973	0.0106011	0.00359885	0.0067906	0.00995722	0.00359363	0.00678048	1.56291	1.56348	0.530766	1.00149	1.46851	0.529996	1	1.21905	0.270927	0.344142	0.643249
mmu-miR-31	Target	0.00142156	0.00094902	0.00044846	0.00042092	0.00145367	0.0004518	0.000775463	1.83318	1.22381	0.578312	0.542798	1.87458	0.582619	1	1.21177	0.437442	0.362298	0.728189
mmu-miR-296-5p	Target	0.00241255	0.00195133	0.00348225	0.00161587	0.0014364	0.00353875	0.00219701	1.09811	0.888177	1.585	0.735487	0.653799	1.61071	1	1.19043	0.306266	0.206383	0.633307
mmu-miR-532-5p	Target	0.00442247	0.00450924	0.00088485	0.0016816	0.00473879	0.0018345	0.00275163	1.60722	1.63875	0.321573	0.611129	1.72218	0.666696	1	1.18918	0.361444	0.4339	0.754457
mmu-miR-666-5p	Target	6e-07	3.6e-07	4.3e-07	4e-07	3.4e-07	4.4e-07	3.93333e-07	1.52542	0.915254	1.09322	1.01695	0.864407	1.11864	1	1.17797	0.0738796	0.181166	0.41448
mmu-miR-219	Target	0.00013513	0.00014651	0.00011012	0.00010262	0.00017485	5.588e-05	0.000111117	1.21611	1.31852	0.99103	0.923534	1.57357	0.502895	1	1.17522	0.311433	0.0967245	0.61955
mmu-miR-151-3p	Target	0.00020678	0.00017203	0.00022301	0.00021414	0.00018655	0.00011346	0.000171383	1.20654	1.00377	1.30124	1.24948	1.0885	0.662025	1	1.17051	0.175261	0.0877382	0.4334
mmu-miR-210	Target	0.00111082	0.00045641	0.00091211	0.00082252	0.00038166	0.00091909	0.000707757	1.56949	0.644869	1.28873	1.16215	0.539253	1.2986	1	1.1677	0.233716	0.273691	0.665489
mmu-miR-204	Target	0.00013468	0.00012761	5.577e-05	0.00010325	0.00011488	5.662e-05	9.15833e-05	1.47057	1.39338	0.608954	1.12739	1.25438	0.618235	1	1.15763	0.194371	0.275244	0.664265
mmu-miR-380-5p	Target	0.00091335	0.00081177	0.00022292	0.00020893	0.00126345	0.00022608	0.000566153	1.61326	1.43383	0.393745	0.369034	2.23164	0.399326	1	1.14694	0.615882	0.380145	0.84902
mmu-miR-181c	Target	2.557e-05	2.551e-05	2.738e-05	2.566e-05	1.445e-05	2.878e-05	2.29633e-05	1.11351	1.1109	1.19234	1.11743	0.629264	1.2533	1	1.13892	0.189472	0.0267199	0.508043
mmu-miR-203	Target	0.00066156	0.00052779	0.00022387	0.00020809	0.00080496	0.00022971	0.000414253	1.59699	1.27408	0.540418	0.502325	1.94316	0.554516	1	1.13716	0.47182	0.312595	0.82043
mmu-miR-21	Target	0.00026104	0.00027644	0.00021938	0.00021337	0.00022852	0.00022642	0.00022277	1.17179	1.24092	0.984783	0.957804	1.02581	1.01638	1	1.1325	0.0212728	0.0765065	0.170529
mmu-miR-124	Target	0.00018594	0.00021579	0.00011085	0.00010205	0.00023546	0.00011525	0.00015092	1.23204	1.42983	0.734495	0.676186	1.56016	0.76365	1	1.13212	0.281218	0.20685	0.724313
mmu-miR-465a-5p	Target	5.3e-07	3.6e-07	4.3e-07	4e-07	3.4e-07	4.4e-07	3.93333e-07	1.34746	0.915254	1.09322	1.01695	0.864407	1.11864	1	1.11864	0.0738796	0.125412	0.460758
mmu-miR-188-3p	Target	4.505e-05	4.5e-07	4.3e-07	4e-07	4.025e-05	4.4e-07	1.36967e-05	3.28912	0.0328547	0.0313945	0.0292042	2.93867	0.0321246	1	1.11779	0.969336	1.08567	0.939384
mmu-miR-7a	Target	0.00016212	6.054e-05	2.804e-05	5.287e-05	0.00014405	2.804e-05	7.49867e-05	2.16198	0.807344	0.373933	0.705059	1.92101	0.373933	1	1.11442	0.47032	0.538518	0.880612
mmu-miR-34a	Target	0.00037764	0.00053442	0.00021875	0.00020847	0.00059307	0.00022857	0.00034337	1.0998	1.5564	0.637068	0.607129	1.7272	0.665667	1	1.09776	0.363994	0.265389	0.83882
mmu-miR-302b	Target	0.0109885	0.00972321	0.00089561	0.0008254	0.0154197	0.00364321	0.00662943	1.65753	1.46667	0.135096	0.124505	2.32594	0.549551	1	1.08643	0.674231	0.478849	0.921789
mmu-miR-183	Target	0.00026399	0.00014131	0.00021999	0.00021299	0.00014228	0.00022593	0.000193733	1.36265	0.729405	1.13553	1.0994	0.734412	1.16619	1	1.07586	0.134187	0.18522	0.756785
rno-miR-190b	Target	1.777e-05	2.661e-05	7.08e-06	6.57e-06	3.898e-05	3.36e-06	1.63033e-05	1.08996	1.63218	0.434267	0.402985	2.39092	0.206093	1	1.05214	0.69778	0.346325	0.949851
mmu-miR-741	Target	1.527e-05	9.08e-06	6.91e-06	1.337e-05	9.21e-06	7.18e-06	9.92e-06	1.53931	0.915323	0.696573	1.34778	0.928427	0.72379	1	1.0504	0.183651	0.25248	0.879572
mmu-miR-99b	Target	0.00145469	0.00142138	0.00364096	0.00348028	0.0009659	0.0017754	0.00207386	0.701441	0.685379	1.75564	1.67817	0.46575	0.856085	1	1.04749	0.357315	0.354108	0.929332
mmu-miR-615-3p	Target	0.00310961	0.00106248	0.00175777	0.00168043	0.00222464	0.00180686	0.00190398	1.63322	0.558032	0.92321	0.88259	1.16842	0.948993	1	1.03815	0.0863631	0.315656	0.912807
mmu-miR-504	Target	3.6e-07	4.3e-07	4.3e-07	4e-07	3.4e-07	4.4e-07	3.93333e-07	0.915254	1.09322	1.09322	1.01695	0.864407	1.11864	1	1.0339	0.0738796	0.059322	0.738595
mmu-miR-125a-3p	Target	1.989e-05	2.878e-05	2.789e-05	2.597e-05	4.159e-05	7.09e-06	2.48833e-05	0.79933	1.1566	1.12083	1.04367	1.6714	0.28493	1	1.02559	0.400835	0.113598	0.953976
mmu-miR-871	Target	4.2e-07	3.6e-07	4.3e-07	4e-07	3.4e-07	4.4e-07	3.93333e-07	1.0678	0.915254	1.09322	1.01695	0.864407	1.11864	1	1.02542	0.0738796	0.0555715	0.796929
rno-miR-349	Target	3.6e-07	4.2e-07	4.3e-07	4e-07	3.4e-07	4.4e-07	3.93333e-07	0.915254	1.0678	1.09322	1.01695	0.864407	1.11864	1	1.02542	0.0738796	0.0555715	0.796929
rno-miR-450a	Target	3.6e-07	2.036e-05	6.81e-06	6.56e-06	1.69e-05	3.47e-06	8.97667e-06	0.040104	2.2681	0.758633	0.730784	1.88266	0.386558	1	1.02228	0.452378	0.656538	0.979045
mmu-miR-302d	Target	0.0083849	0.00606951	0.00178726	0.00165943	0.0106716	0.00367533	0.00533547	1.57154	1.13758	0.334977	0.311019	2.00013	0.688848	1	1.0147	0.511823	0.362214	0.982422
mmu-miR-671-3p	Target	5.66e-05	3.717e-05	6.93e-06	6.53e-06	8.576e-05	7.01e-06	3.31e-05	1.70997	1.12296	0.209366	0.197281	2.59094	0.211782	1	1.0141	0.795479	0.436593	0.988348
mmu-miR-425	Target	0.00014906	0.0004612	0.00086638	0.0008582	0.00014075	0.00045962	0.00048619	0.306588	0.9486	1.78198	1.76515	0.289496	0.945351	1	1.01239	0.426861	0.427101	0.984614
mmu-miR-135b	Target	0.00600316	0.00670842	0.00179556	0.0034005	0.00727406	0.00368524	0.0047866	1.25416	1.4015	0.375122	0.710421	1.51967	0.769908	1	1.01026	0.260403	0.320405	0.981364
mmu-miR-409-5p	Target	3.046e-05	0.00013978	5.583e-05	0.00010526	6.171e-05	5.744e-05	7.48033e-05	0.407201	1.86863	0.746357	1.40716	0.824963	0.76788	1	1.0074	0.204244	0.441608	0.988598
mmu-miR-15a	Target	0.00017835	6.714e-05	0.00045622	0.00037999	0.00011253	0.0002146	0.000235707	0.756661	0.284846	1.93554	1.61213	0.477415	0.910454	1	0.992349	0.33061	0.49087	0.990305
mmu-miR-339-5p	Target	0.00022672	0.00015686	0.00011397	0.00010322	0.00028482	0.00011383	0.00016729	1.35525	0.937653	0.681272	0.617012	1.70255	0.680435	1	0.991392	0.351753	0.196408	0.983977
mmu-miR-30d	Target	0.00057722	0.0004531	0.0002221	0.000207	0.00083718	0.00022604	0.000423407	1.36328	1.07013	0.524555	0.488892	1.97725	0.53386	1	0.985987	0.488796	0.245746	0.980792
mmu-miR-375	Target	0.00037278	0.00028808	0.00022368	0.00010527	0.00056831	0.0002291	0.000300893	1.23891	0.957416	0.743386	0.349858	1.88874	0.761399	1	0.979904	0.459978	0.143487	0.968732
mmu-miR-490	Target	6.69e-06	4.2e-07	4.3e-07	4e-07	6.87e-06	4.4e-07	2.57e-06	2.60311	0.163424	0.167315	0.155642	2.67315	0.171206	1	0.977951	0.836588	0.812582	0.985822
mmu-miR-100	Target	3.6e-07	3.6e-07	4.3e-07	4e-07	3.4e-07	4.4e-07	3.93333e-07	0.915254	0.915254	1.09322	1.01695	0.864407	1.11864	1	0.974576	0.0738796	0.059322	0.801717
mmu-miR-139-3p	Target	3.6e-07	3.6e-07	4.3e-07	4e-07	3.4e-07	4.4e-07	3.93333e-07	0.915254	0.915254	1.09322	1.01695	0.864407	1.11864	1	0.974576	0.0738796	0.059322	0.801717
mmu-miR-146b	Target	3.6e-07	3.6e-07	4.3e-07	4e-07	3.4e-07	4.4e-07	3.93333e-07	0.915254	0.915254	1.09322	1.01695	0.864407	1.11864	1	0.974576	0.0738796	0.059322	0.801717
mmu-miR-147	Target	3.6e-07	3.6e-07	4.3e-07	4e-07	3.4e-07	4.4e-07	3.93333e-07	0.915254	0.915254	1.09322	1.01695	0.864407	1.11864	1	0.974576	0.0738796	0.059322	0.801717
mmu-miR-201	Target	3.6e-07	3.6e-07	4.3e-07	4e-07	3.4e-07	4.4e-07	3.93333e-07	0.915254	0.915254	1.09322	1.01695	0.864407	1.11864	1	0.974576	0.0738796	0.059322	0.801717
mmu-miR-202-5p	Target	3.6e-07	3.6e-07	4.3e-07	4e-07	3.4e-07	4.4e-07	3.93333e-07	0.915254	0.915254	1.09322	1.01695	0.864407	1.11864	1	0.974576	0.0738796	0.059322	0.801717
mmu-miR-23a	Target	3.6e-07	3.6e-07	4.3e-07	4e-07	3.4e-07	4.4e-07	3.93333e-07	0.915254	0.915254	1.09322	1.01695	0.864407	1.11864	1	0.974576	0.0738796	0.059322	0.801717
mmu-miR-346	Target	3.6e-07	3.6e-07	4.3e-07	4e-07	3.4e-07	4.4e-07	3.93333e-07	0.915254	0.915254	1.09322	1.01695	0.864407	1.11864	1	0.974576	0.0738796	0.059322	0.801717
mmu-miR-448	Target	3.6e-07	3.6e-07	4.3e-07	4e-07	3.4e-07	4.4e-07	3.93333e-07	0.915254	0.915254	1.09322	1.01695	0.864407	1.11864	1	0.974576	0.0738796	0.059322	0.801717
mmu-miR-464	Target	3.6e-07	3.6e-07	4.3e-07	4e-07	3.4e-07	4.4e-07	3.93333e-07	0.915254	0.915254	1.09322	1.01695	0.864407	1.11864	1	0.974576	0.0738796	0.059322	0.801717
mmu-miR-468	Target	3.6e-07	3.6e-07	4.3e-07	4e-07	3.4e-07	4.4e-07	3.93333e-07	0.915254	0.915254	1.09322	1.01695	0.864407	1.11864	1	0.974576	0.0738796	0.059322	0.801717
mmu-miR-469	Target	3.6e-07	3.6e-07	4.3e-07	4e-07	3.4e-07	4.4e-07	3.93333e-07	0.915254	0.915254	1.09322	1.01695	0.864407	1.11864	1	0.974576	0.0738796	0.059322	0.801717
mmu-miR-470	Target	3.6e-07	3.6e-07	4.3e-07	4e-07	3.4e-07	4.4e-07	3.93333e-07	0.915254	0.915254	1.09322	1.01695	0.864407	1.11864	1	0.974576	0.0738796	0.059322	0.801717
mmu-miR-505	Target	3.6e-07	3.6e-07	4.3e-07	4e-07	3.4e-07	4.4e-07	3.93333e-07	0.915254	0.915254	1.09322	1.01695	0.864407	1.11864	1	0.974576	0.0738796	0.059322	0.801717
mmu-miR-509-5p	Target	3.6e-07	3.6e-07	4.3e-07	4e-07	3.4e-07	4.4e-07	3.93333e-07	0.915254	0.915254	1.09322	1.01695	0.864407	1.11864	1	0.974576	0.0738796	0.059322	0.801717
mmu-miR-551b	Target	3.6e-07	3.6e-07	4.3e-07	4e-07	3.4e-07	4.4e-07	3.93333e-07	0.915254	0.915254	1.09322	1.01695	0.864407	1.11864	1	0.974576	0.0738796	0.059322	0.801717
mmu-miR-654-5p	Target	3.6e-07	3.6e-07	4.3e-07	4e-07	3.4e-07	4.4e-07	3.93333e-07	0.915254	0.915254	1.09322	1.01695	0.864407	1.11864	1	0.974576	0.0738796	0.059322	0.801717
mmu-miR-675-5p	Target	3.6e-07	3.6e-07	4.3e-07	4e-07	3.4e-07	4.4e-07	3.93333e-07	0.915254	0.915254	1.09322	1.01695	0.864407	1.11864	1	0.974576	0.0738796	0.059322	0.801717
mmu-miR-686	Target	3.6e-07	3.6e-07	4.3e-07	4e-07	3.4e-07	4.4e-07	3.93333e-07	0.915254	0.915254	1.09322	1.01695	0.864407	1.11864	1	0.974576	0.0738796	0.059322	0.801717
mmu-miR-743b-5p	Target	3.6e-07	3.6e-07	4.3e-07	4e-07	3.4e-07	4.4e-07	3.93333e-07	0.915254	0.915254	1.09322	1.01695	0.864407	1.11864	1	0.974576	0.0738796	0.059322	0.801717
mmu-miR-770-3p	Target	3.6e-07	3.6e-07	4.3e-07	4e-07	3.4e-07	4.4e-07	3.93333e-07	0.915254	0.915254	1.09322	1.01695	0.864407	1.11864	1	0.974576	0.0738796	0.059322	0.801717
mmu-miR-802	Target	3.6e-07	3.6e-07	4.3e-07	4e-07	3.4e-07	4.4e-07	3.93333e-07	0.915254	0.915254	1.09322	1.01695	0.864407	1.11864	1	0.974576	0.0738796	0.059322	0.801717
mmu-miR-874	Target	3.6e-07	3.6e-07	4.3e-07	4e-07	3.4e-07	4.4e-07	3.93333e-07	0.915254	0.915254	1.09322	1.01695	0.864407	1.11864	1	0.974576	0.0738796	0.059322	0.801717
mmu-miR-876-3p	Target	3.6e-07	3.6e-07	4.3e-07	4e-07	3.4e-07	4.4e-07	3.93333e-07	0.915254	0.915254	1.09322	1.01695	0.864407	1.11864	1	0.974576	0.0738796	0.059322	0.801717
mmu-miR-876-5p	Target	3.6e-07	3.6e-07	4.3e-07	4e-07	3.4e-07	4.4e-07	3.93333e-07	0.915254	0.915254	1.09322	1.01695	0.864407	1.11864	1	0.974576	0.0738796	0.059322	0.801717
mmu-miR-878-5p	Target	3.6e-07	3.6e-07	4.3e-07	4e-07	3.4e-07	4.4e-07	3.93333e-07	0.915254	0.915254	1.09322	1.01695	0.864407	1.11864	1	0.974576	0.0738796	0.059322	0.801717
mmu-miR-879	Target	3.6e-07	3.6e-07	4.3e-07	4e-07	3.4e-07	4.4e-07	3.93333e-07	0.915254	0.915254	1.09322	1.01695	0.864407	1.11864	1	0.974576	0.0738796	0.059322	0.801717
mmu-miR-883a-5p	Target	3.6e-07	3.6e-07	4.3e-07	4e-07	3.4e-07	4.4e-07	3.93333e-07	0.915254	0.915254	1.09322	1.01695	0.864407	1.11864	1	0.974576	0.0738796	0.059322	0.801717
mmu-miR-883b-3p	Target	3.6e-07	3.6e-07	4.3e-07	4e-07	3.4e-07	4.4e-07	3.93333e-07	0.915254	0.915254	1.09322	1.01695	0.864407	1.11864	1	0.974576	0.0738796	0.059322	0.801717
rno-miR-17-3p	Target	3.6e-07	3.6e-07	4.3e-07	4e-07	3.4e-07	4.4e-07	3.93333e-07	0.915254	0.915254	1.09322	1.01695	0.864407	1.11864	1	0.974576	0.0738796	0.059322	0.801717
rno-miR-20b-3p	Target	3.6e-07	3.6e-07	4.3e-07	4e-07	3.4e-07	4.4e-07	3.93333e-07	0.915254	0.915254	1.09322	1.01695	0.864407	1.11864	1	0.974576	0.0738796	0.059322	0.801717
rno-miR-333	Target	3.6e-07	3.6e-07	4.3e-07	4e-07	3.4e-07	4.4e-07	3.93333e-07	0.915254	0.915254	1.09322	1.01695	0.864407	1.11864	1	0.974576	0.0738796	0.059322	0.801717
rno-miR-336	Target	3.6e-07	3.6e-07	4.3e-07	4e-07	3.4e-07	4.4e-07	3.93333e-07	0.915254	0.915254	1.09322	1.01695	0.864407	1.11864	1	0.974576	0.0738796	0.059322	0.801717
rno-miR-343	Target	3.6e-07	3.6e-07	4.3e-07	4e-07	3.4e-07	4.4e-07	3.93333e-07	0.915254	0.915254	1.09322	1.01695	0.864407	1.11864	1	0.974576	0.0738796	0.059322	0.801717
rno-miR-344-3p	Target	3.6e-07	3.6e-07	4.3e-07	4e-07	3.4e-07	4.4e-07	3.93333e-07	0.915254	0.915254	1.09322	1.01695	0.864407	1.11864	1	0.974576	0.0738796	0.059322	0.801717
rno-miR-344-5p	Target	3.6e-07	3.6e-07	4.3e-07	4e-07	3.4e-07	4.4e-07	3.93333e-07	0.915254	0.915254	1.09322	1.01695	0.864407	1.11864	1	0.974576	0.0738796	0.059322	0.801717
rno-miR-347	Target	3.6e-07	3.6e-07	4.3e-07	4e-07	3.4e-07	4.4e-07	3.93333e-07	0.915254	0.915254	1.09322	1.01695	0.864407	1.11864	1	0.974576	0.0738796	0.059322	0.801717
rno-miR-409-5p	Target	3.6e-07	3.6e-07	4.3e-07	4e-07	3.4e-07	4.4e-07	3.93333e-07	0.915254	0.915254	1.09322	1.01695	0.864407	1.11864	1	0.974576	0.0738796	0.059322	0.801717
rno-miR-543	Target	3.6e-07	3.6e-07	4.3e-07	4e-07	3.4e-07	4.4e-07	3.93333e-07	0.915254	0.915254	1.09322	1.01695	0.864407	1.11864	1	0.974576	0.0738796	0.059322	0.801717
rno-miR-673	Target	3.6e-07	3.6e-07	4.3e-07	4e-07	3.4e-07	4.4e-07	3.93333e-07	0.915254	0.915254	1.09322	1.01695	0.864407	1.11864	1	0.974576	0.0738796	0.059322	0.801717
rno-miR-760-5p	Target	3.6e-07	3.6e-07	4.3e-07	4e-07	3.4e-07	4.4e-07	3.93333e-07	0.915254	0.915254	1.09322	1.01695	0.864407	1.11864	1	0.974576	0.0738796	0.059322	0.801717
rno-miR-871	Target	3.6e-07	3.6e-07	4.3e-07	4e-07	3.4e-07	4.4e-07	3.93333e-07	0.915254	0.915254	1.09322	1.01695	0.864407	1.11864	1	0.974576	0.0738796	0.059322	0.801717
mmu-miR-325	Target	0.00013292	1.58e-05	2.809e-05	5.092e-05	0.00011679	1.391e-05	6.054e-05	2.19557	0.260984	0.463991	0.841097	1.92914	0.229765	1	0.973516	0.496959	0.613832	0.974856
mmu-miR-743b-3p	Target	3.6e-07	3.6e-07	4.3e-07	4e-07	3.5e-07	4.4e-07	3.96667e-07	0.907563	0.907563	1.08403	1.0084	0.882353	1.10924	1	0.966387	0.0656324	0.0588235	0.722311
mmu-miR-291a-3p	Target	0.00054642	0.0003363	0.00011334	0.00010636	0.00069897	0.00022805	0.00034446	1.58631	0.976311	0.329037	0.308773	2.02918	0.662051	1	0.963886	0.524596	0.362996	0.95757
rno-miR-224	Target	5.904e-05	0.00013443	2.761e-05	5.291e-05	0.00012712	5.664e-05	7.889e-05	0.748384	1.70402	0.349981	0.670681	1.61136	0.717962	1	0.934128	0.305983	0.401759	0.902517
mmu-miR-497	Target	0.00015107	0.000123	5.463e-05	5.26e-05	0.00025317	5.564e-05	0.00012047	1.25401	1.021	0.453474	0.436623	2.10152	0.461858	1	0.909493	0.550808	0.237724	0.887385
mmu-miR-302c	Target	0.00041966	0.00029969	0.00011037	0.00020526	0.00048956	0.0002244	0.000306407	1.36962	0.978079	0.360208	0.669894	1.59775	0.73236	1	0.902635	0.299416	0.293823	0.827854
rno-miR-532-5p	Target	0.0003022	0.00012706	0.00082107	0.0008597	8.888e-05	0.00045198	0.000466853	0.647313	0.272163	1.75873	1.84148	0.190381	0.968141	1	0.892736	0.476897	0.446336	0.877524
mmu-miR-682	Target	1.39e-06	2.251e-05	4.3e-07	4e-07	1.988e-05	7.11e-06	9.13e-06	0.152245	2.4655	0.0470975	0.0438116	2.17744	0.778751	1	0.88828	0.62578	0.789193	0.917021
mmu-miR-540-5p	Target	1.407e-05	1.564e-05	4.3e-07	2.654e-05	3.4e-07	7.58e-06	1.14867e-05	1.2249	1.36158	0.0374347	2.3105	0.0295995	0.659896	1	0.874637	0.680045	0.420457	0.883002
mmu-miR-542-5p	Target	4.549e-05	4.54e-05	1.399e-05	5.284e-05	3.847e-05	2.871e-05	4.00067e-05	1.13706	1.13481	0.349692	1.32078	0.96159	0.71763	1	0.873854	0.17517	0.262082	0.709484
mmu-miR-185	Target	0.00017199	0.00013293	5.628e-05	5.197e-05	0.00030595	5.709e-05	0.000138337	1.24327	0.960917	0.406834	0.375678	2.21163	0.412689	1	0.87034	0.605911	0.245669	0.852473
mmu-miR-142-5p	Target	2.09e-06	1.905e-05	4.3e-07	1.308e-05	1.129e-05	4.4e-07	8.27e-06	0.252721	2.30351	0.0519952	1.58162	1.36518	0.0532044	1	0.869407	0.477503	0.719387	0.887102
mmu-miR-297c	Target	3.6e-07	4.76e-06	4.3e-07	4e-07	5.69e-06	4.4e-07	2.17667e-06	0.165391	2.18683	0.19755	0.183767	2.61409	0.202144	1	0.849923	0.807062	0.668518	0.893052
mmu-miR-302a	Target	0.00212326	0.00120447	0.00090252	0.00084188	0.00245856	0.00182801	0.00170948	1.24205	0.704581	0.527949	0.492476	1.43819	1.06933	1	0.824859	0.275196	0.214736	0.642205
mmu-miR-680	Target	1.022e-05	0.00014056	5.334e-05	0.00010618	8.481e-05	5.732e-05	8.277e-05	0.123475	1.6982	0.644436	1.28283	1.02465	0.692521	1	0.822037	0.170853	0.463176	0.736718
mmu-miR-96	Target	1.247e-05	4.543e-05	1.389e-05	6.39e-06	7.524e-05	7.01e-06	2.95467e-05	0.422044	1.53757	0.470104	0.216268	2.54648	0.237252	1	0.809905	0.773264	0.364096	0.834888
mmu-miR-217	Target	1.53e-06	9.63e-06	2.752e-05	2.578e-05	7.69e-06	1.451e-05	1.59933e-05	0.0956649	0.602126	1.72072	1.61192	0.480825	0.907253	1	0.806169	0.329796	0.480078	0.756004
mmu-miR-501-3p	Target	8.102e-05	9.262e-05	0.00041386	0.00039305	0.00013699	0.0002274	0.00025248	0.320897	0.366841	1.63918	1.55676	0.542578	0.900665	1	0.775639	0.296951	0.431974	0.690682
rno-miR-742	Target	1.95e-06	4.2e-07	4.3e-07	4e-07	2.85e-06	4.4e-07	1.23e-06	1.58537	0.341463	0.349593	0.325203	2.31707	0.357724	1	0.758808	0.658603	0.413286	0.771899
mmu-miR-376b	Target	0.00047022	0.00029059	0.00088605	0.00085402	0.00042036	0.00089694	0.000723773	0.649679	0.401493	1.22421	1.17996	0.58079	1.23926	1	0.75846	0.210303	0.243646	0.494711
mmu-miR-207	Target	3.6e-07	3.6e-07	4.3e-07	4e-07	6.8e-07	4.4e-07	5.06667e-07	0.710526	0.710526	0.848684	0.789474	1.34211	0.868421	1	0.756579	0.172564	0.0460526	0.244591
mmu-miR-669a	Target	0.00011627	6.813e-05	0.00011341	0.00010688	0.00017838	0.00011374	0.000133	0.874211	0.512256	0.852707	0.803609	1.3412	0.855188	1	0.746391	0.17125	0.117232	0.288788
mmu-miR-324-3p	Target	0.0003137	0.00018655	0.00022095	0.00040563	0.00034727	0.00021967	0.00032419	0.967642	0.575434	0.681545	1.25121	1.07119	0.677596	1	0.74154	0.169371	0.117127	0.277764
mmu-miR-467d	Target	0.00013708	0.000171	6.96e-06	0.00039654	6.215e-05	7.27e-06	0.00015532	0.882565	1.10095	0.0448107	2.55305	0.400142	0.0468066	1	0.67611	0.783196	0.321884	0.721543
rno-miR-598-5p	Target	5e-07	8.24e-06	4.3e-07	6.53e-06	3.4e-07	7.1e-06	4.65667e-06	0.107373	1.76951	0.0923407	1.40229	0.0730136	1.5247	1	0.656407	0.464838	0.556567	0.660329
mmu-miR-208	Target	5.74e-06	3.6e-07	4.3e-07	4e-07	2.76e-06	6.84e-06	3.33333e-06	1.722	0.108	0.129	0.12	0.828	2.052	1	0.653	0.564312	0.534534	0.678393
mmu-miR-197	Target	1.513e-05	2.331e-05	2.777e-05	5.147e-05	2.188e-05	2.889e-05	3.408e-05	0.443955	0.683979	0.814847	1.51027	0.642019	0.847711	1	0.647594	0.261954	0.108602	0.28184
mmu-miR-668	Target	1.104e-05	6.79e-06	4.3e-07	4e-07	2.13e-06	2.796e-05	1.01633e-05	1.08626	0.668088	0.042309	0.0393572	0.209577	2.75107	1	0.598885	0.876911	0.303342	0.687819
mmu-miR-193	Target	4.99e-06	7.24e-06	4.3e-07	6.51e-06	1.438e-05	4.4e-07	7.11e-06	0.701828	1.01828	0.0604782	0.915612	2.0225	0.0618847	1	0.59353	0.567553	0.281747	0.556119
mmu-miR-339-3p	Target	1.769e-05	3.715e-05	0.00022625	0.00020406	5.746e-05	0.00022635	0.000162623	0.108779	0.228442	1.39125	1.2548	0.353332	1.39187	1	0.576158	0.325746	0.409008	0.463067
mmu-miR-10a	Target	9.019e-05	0.00020568	0.00092349	0.0015665	0.00013626	0.00044266	0.00071514	0.126115	0.287608	1.29134	2.19048	0.190536	0.618984	1	0.568355	0.607954	0.364487	0.575451
mmu-miR-29b	Target	5.2e-07	4.147e-05	4.3e-07	6.55e-06	6.485e-05	7.05e-06	2.615e-05	0.0198853	1.58585	0.0164436	0.250478	2.47992	0.269598	1	0.540727	0.739982	0.522563	0.638839
mmu-miR-496	Target	7.01e-06	1.73e-05	4.3e-07	6.55e-06	3.56e-05	7.08e-06	1.641e-05	0.427179	1.05424	0.0262035	0.399147	2.16941	0.431444	1	0.502539	0.584779	0.29915	0.49101
mmu-miR-211	Target	2.255e-05	1.845e-05	4.3e-07	5.408e-05	3.4e-07	2.825e-05	2.75567e-05	0.818314	0.669529	0.0156042	1.9625	0.0123382	1.02516	1	0.501149	0.563104	0.246542	0.462595
rno-miR-219-1-3p	Target	9.235e-05	0.00013092	5.513e-05	0.00019827	0.00027889	0.00011113	0.000196097	0.470941	0.66763	0.281137	1.01108	1.42221	0.56671	1	0.473236	0.247023	0.111577	0.123892
mmu-let-7b	Target	5.19e-06	1.73e-06	7.02e-06	6.33e-06	1.625e-05	7.16e-06	9.91333e-06	0.523537	0.174512	0.708137	0.638534	1.63921	0.72226	1	0.468729	0.320516	0.156463	0.210585
rno-miR-207	Target	1.755e-05	2.581e-05	0.00011798	0.00020354	3.111e-05	0.00011026	0.00011497	0.152649	0.224493	1.02618	1.77037	0.270592	0.959033	1	0.467774	0.433434	0.279973	0.360607
mmu-miR-220	Target	3.6e-07	3.6e-07	4.3e-07	4e-07	1.74e-06	4.4e-07	8.6e-07	0.418605	0.418605	0.5	0.465116	2.02326	0.511628	1	0.445736	0.511804	0.0271318	0.340343
mmu-miR-290-3p	Target	3.6e-07	3.6e-07	3.55e-06	4e-07	9.79e-06	4.4e-07	3.54333e-06	0.101599	0.101599	1.00188	0.112888	2.76294	0.124177	1	0.401693	0.881474	0.300094	0.555499
rno-miR-466c	Target	8.92e-06	3.6e-07	4.3e-07	2.567e-05	3.4e-07	4.4e-07	8.81667e-06	1.01172	0.0408318	0.0487713	2.91153	0.0385633	0.0499055	1	0.367108	0.955771	0.322314	0.564395
mmu-miR-685	Target	1.557e-05	3.007e-05	0.00011065	0.00020591	0.0001149	0.00011505	0.000145287	0.107167	0.20697	0.761598	1.41727	0.79085	0.791883	1	0.358578	0.208634	0.203559	0.0925989
mmu-miR-500	Target	3.18e-05	5.1e-07	4.3e-07	5.228e-05	2.897e-05	1.438e-05	3.18767e-05	0.997595	0.0159992	0.0134895	1.64007	0.908815	0.451114	1	0.342361	0.346237	0.327618	0.239799
mmu-miR-381	Target	1.586e-05	3.6e-07	6.92e-06	6.62e-06	6.404e-05	3.6e-06	2.47533e-05	0.640722	0.0145435	0.279558	0.267439	2.58713	0.145435	1	0.311608	0.794344	0.181471	0.445766
rno-miR-377	Target	3.6e-07	3.6e-07	4.3e-07	3.24e-06	3.4e-07	4.4e-07	1.34e-06	0.268657	0.268657	0.320896	2.41791	0.253731	0.328358	1	0.28607	0.709282	0.0174129	0.371226
mmu-miR-679	Target	3.54e-06	3.6e-07	4.3e-07	4e-07	1.188e-05	6.94e-06	6.40667e-06	0.552549	0.0561915	0.0671176	0.062435	1.85432	1.08325	1	0.225286	0.518944	0.163662	0.227621
mmu-miR-465a-3p	Target	3.6e-07	1.01e-06	4.3e-07	4e-07	1.61e-06	7.45e-06	3.15333e-06	0.114165	0.320296	0.136364	0.12685	0.510571	2.36258	1	0.190275	0.690236	0.0653256	0.307714
mmu-miR-465b-5p	Target	3.6e-07	3.6e-07	4.3e-07	6.28e-06	3.4e-07	4.4e-07	2.35333e-06	0.152975	0.152975	0.18272	2.66856	0.144476	0.186969	1	0.16289	0.834368	0.00991501	0.372522
mmu-miR-154	Target	3.6e-07	3.6e-07	4.3e-07	4e-07	3.4e-07	7.01e-06	2.58333e-06	0.139355	0.139355	0.166452	0.154839	0.131613	2.71355	1	0.148387	0.8568	0.00903226	0.376532
mmu-miR-291b-5p	Target	3.6e-07	3.6e-07	4.3e-07	4e-07	7.09e-06	4.4e-07	2.64333e-06	0.136192	0.136192	0.162673	0.151324	2.68222	0.166456	1	0.145019	0.841121	0.00882724	0.366908
mmu-miR-449b	Target	3.6e-07	1.19e-06	4.3e-07	4e-07	3.4e-07	1.41e-05	4.94667e-06	0.0727763	0.240566	0.0869272	0.0808625	0.0687332	2.8504	1	0.133423	0.925209	0.053727	0.402697
mmu-miR-215	Target	3.6e-07	1.26e-06	4.3e-07	4e-07	1.72e-05	4.4e-07	6.01333e-06	0.059867	0.209534	0.0715078	0.0665188	2.86031	0.0731707	1	0.113636	0.930157	0.0480666	0.395164
mmu-miR-509-3p	Target	3e-06	1.412e-05	6.93e-06	0.00021868	1.783e-05	1.427e-05	8.35933e-05	0.035888	0.168913	0.0829013	2.616	0.213295	0.170707	1	0.0959008	0.808093	0.0389472	0.326364
mmu-miR-875-3p	Target	3.6e-07	5.63e-06	4.3e-07	4.765e-05	3.4e-07	2.701e-05	2.5e-05	0.0144	0.2252	0.0172	1.906	0.0136	1.0804	1	0.0856	0.547766	0.0698047	0.173077
mmu-miR-687	Target	2.236e-05	1.067e-05	4.3e-07	4e-07	4.57e-06	0.00047517	0.000160047	0.139709	0.0666681	0.00268672	0.00249927	0.0285542	2.96895	1	0.069688	0.984502	0.0395838	0.398533
mmu-miR-184	Target	1.23e-06	6.5e-07	4.3e-07	1.327e-05	0.00016087	2.889e-05	6.76767e-05	0.0181747	0.00960449	0.00635374	0.196079	2.37704	0.426883	1	0.0113776	0.691735	0.00352569	0.226164
mmu-miR-122	Target	3.6e-07	3.6e-07	4.3e-07	4e-07	3.4e-07	0.00011229	3.76767e-05	0.00955499	0.00955499	0.0114129	0.0106167	0.00902415	2.98036	1	0.0101743	0.99018	0.000619305	0.374055
mmu-miR-105	Target	3.6e-07	3.6e-07	4.3e-07	4e-07	0.00031445	4.4e-07	0.000105097	0.00342542	0.00342542	0.00409147	0.00380602	2.99201	0.00418662	1	0.00364744	0.996004	0.000222018	0.373751

## Sheet: let-7 qPCR
Sample Name	Detector Name	Ct	Detector Name	Ct	AveCt(let-7)	AveCt(RNU6B)	dCt	ddCt			relative expression	Ave (relative)	SE	p-value
Wt1	let-7a	31.498	RNU6B	29.7427	31.4931	29.654	1.83911	0	1	0.906723	1.10287	1	0.12756
Wt1	let-7a	31.4883	RNU6B	29.5654
Wt2	let-7a	32.0984	RNU6B	29.9826	32.1799	29.7775	2.40239	0.563281	0.676761		0.746382
Wt2	let-7a	32.2612	RNU6B	29.5723
Wt3	let-7a	31.7781	RNU6B	29.9112	31.7261	29.9483	1.77781	-0.0613025	1.04341		1.15075
Wt3	let-7a	31.6742	RNU6B	29.9855
KO1	let-7a	27.9734	RNU6B	29.8165	27.9231	29.6445	-1.72142	-3.56053	11.7985		13.0123	12.7254	0.32789	4.83457e-06
KO1	let-7a	27.8728	RNU6B	29.4726
KO2	let-7a	28.0868	RNU6B	29.6296	28.0173	29.6305	-1.61313	-3.45224	10.9453		12.0713
KO2	let-7a	27.9479	RNU6B	29.6313
KO3	let-7a	27.8636	RNU6B	29.5953	27.9053	29.6356	-1.73032	-3.56943	11.8715		13.0927
KO3	let-7a	27.947	RNU6B	29.6759
Sample Name	Detector Name	Ct	Detector Name	Ct	AveCt(let-7)	AveCt(RNU6B)	dCt	ddCt			relative expression	Ave (relative)	SE	p-value
Wt1	let-7b	32.4279	RNU6B	29.7427	32.5033	29.654	2.84927	0	1	1.10295	0.906663	1	0.0582966
Wt1	let-7b	32.5787	RNU6B	29.5654
Wt2	let-7b	32.8778	RNU6B	29.9826	32.5055	29.7775	2.72802	-0.12125	1.08768		0.986157
Wt2	let-7b	32.1332	RNU6B	29.5723
Wt3	let-7b	32.4966	RNU6B	29.9112	32.5093	29.9483	2.56101	-0.288251	1.22116		1.10718
Wt3	let-7b	32.5221	RNU6B	29.9855
KO1	let-7b	30.9588	RNU6B	29.8165	30.8352	29.6445	1.19069	-1.65857	3.15704		2.86237	3.41204	0.294796	0.00130726
KO1	let-7b	30.7117	RNU6B	29.4726
KO2	let-7b	30.6042	RNU6B	29.6296	30.5301	29.6305	0.89965	-1.94962	3.86272		3.50218
KO2	let-7b	30.456	RNU6B	29.6313
KO3	let-7b	30.4605	RNU6B	29.5953	30.3906	29.6356	0.754987	-2.09428	4.27013		3.87157
KO3	let-7b	30.3206	RNU6B	29.6759
Sample Name	Detector Name	Ct	Detector Name	Ct	AveCt(let-7)	AveCt(RNU6B)	dCt	ddCt			relative expression	Ave (relative)	SE	p-value
Wt1	let-7c	32.0872	RNU6B	29.7427	31.8579	29.654	2.20382	0	1	0.771461	1.29624	1	0.174662
Wt1	let-7c	31.6285	RNU6B	29.5654
Wt2	let-7c	32.8151	RNU6B	29.9826	32.8877	29.7775	3.11022	0.906403	0.533514		0.691563
Wt2	let-7c	32.9603	RNU6B	29.5723
Wt3	let-7c	32.4125	RNU6B	29.9112	32.509	29.9483	2.56067	0.356848	0.780869		1.0122
Wt3	let-7c	32.6055	RNU6B	29.9855
KO1	let-7c	30.5633	RNU6B	29.8165	30.4816	29.6445	0.837027	-1.36679	2.57897		3.34297	3.86913	0.295606	0.00112134
KO1	let-7c	30.3999	RNU6B	29.4726
KO2	let-7c	30.3245	RNU6B	29.6296	30.2456	29.6305	0.615153	-1.58867	3.00772		3.89873
KO2	let-7c	30.1667	RNU6B	29.6313
KO3	let-7c	30.145	RNU6B	29.5953	30.0875	29.6356	0.451946	-1.75188	3.36796		4.36569
KO3	let-7c	30.0301	RNU6B	29.6759
Sample Name	Detector Name	Ct	Detector Name	Ct	AveCt(let-7)	AveCt(RNU6B)	dCt	ddCt			relative expression	Ave (relative)	SE	p-value
Wt1	let-7d	32.7284	RNU6B	29.7427	32.6345	29.654	2.98045	0	1	0.976867	1.02368	1	0.0697093
Wt1	let-7d	32.5405	RNU6B	29.5654
Wt2	let-7d	32.8258	RNU6B	29.9826	32.994	29.7775	3.2165	0.236049	0.849067		0.869174
Wt2	let-7d	33.1621	RNU6B	29.5723
Wt3	let-7d	32.9432	RNU6B	29.9112	32.8157	29.9483	2.86737	-0.113078	1.08153		1.10715
Wt3	let-7d	32.6882	RNU6B	29.9855
KO1	let-7d	29.1714	RNU6B	29.8165	29.073	29.6445	-0.571544	-3.552	11.7289		12.0066	9.04627	1.51259	0.00603039
KO1	let-7d	28.9746	RNU6B	29.4726
KO2	let-7d	29.5136	RNU6B	29.6296	29.6258	29.6305	-0.0046725	-2.98512	7.91793		8.10544
KO2	let-7d	29.738	RNU6B	29.6313
KO3	let-7d	30.1381	RNU6B	29.5953	29.837	29.6356	0.201367	-2.77908	6.86416		7.02671
KO3	let-7d	29.5358	RNU6B	29.6759
Sample Name	Detector Name	Ct	Detector Name	Ct	AveCt(let-7)	AveCt(RNU6B)	dCt	ddCt			relative expression	Ave (relative)	SE	p-value
Wt1	let-7e	29.9537	RNU6B	29.7427	29.7811	29.654	0.127093	0	1	0.750971	1.33161	1	0.178684
Wt1	let-7e	29.6086	RNU6B	29.5654
Wt2	let-7e	30.6856	RNU6B	29.9826	30.794	29.7775	1.01655	0.889459	0.539817		0.718824
Wt2	let-7e	30.9024	RNU6B	29.5723
Wt3	let-7e	30.4315	RNU6B	29.9112	30.5632	29.9483	0.614922	0.487829	0.713097		0.949567
Wt3	let-7e	30.695	RNU6B	29.9855
KO1	let-7e	27.4823	RNU6B	29.8165	27.5728	29.6445	-2.07168	-2.19877	4.59088		6.11326	6.13848	0.153222	2.60531e-05
KO1	let-7e	27.6634	RNU6B	29.4726
KO2	let-7e	27.559	RNU6B	29.6296	27.6133	29.6305	-2.01717	-2.14426	4.42067		5.8866
KO2	let-7e	27.6676	RNU6B	29.6313
KO3	let-7e	27.4973	RNU6B	29.5953	27.4943	29.6356	-2.14132	-2.26841	4.81791		6.41558
KO3	let-7e	27.4913	RNU6B	29.6759
Sample Name	Detector Name	Ct	Detector Name	Ct	AveCt(let-7)	AveCt(RNU6B)	dCt	ddCt			relative expression	Ave (relative)	SE	p-value
Wt1	let-7f	33.8226	RNU6B	29.7427	33.8159	29.654	4.1619	0	1	0.795451	1.25715	1	0.128575
Wt1	let-7f	33.8092	RNU6B	29.5654
Wt2	let-7f	34.3313	RNU6B	29.9826	34.4695	29.7775	4.69201	0.530111	0.692501		0.870577
Wt2	let-7f	34.6076	RNU6B	29.5723
Wt3	let-7f	34.4725	RNU6B	29.9112	34.6375	29.9483	4.6892	0.527303	0.693851		0.872274
Wt3	let-7f	34.8026	RNU6B	29.9855
KO1	let-7f	31.2731	RNU6B	29.8165	31.1404	29.6445	1.49591	-2.66598	6.34659		7.97861	5.91462	1.0336	0.00918183
KO1	let-7f	31.0078	RNU6B	29.4726
KO2	let-7f	31.7819	RNU6B	29.6296	31.8057	29.6305	2.1752	-1.98669	3.96328		4.98243
KO2	let-7f	31.8295	RNU6B	29.6313
KO3	let-7f	31.5348	RNU6B	29.5953	31.8698	29.6356	2.23419	-1.92771	3.8045		4.78283
KO3	let-7f	32.2047	RNU6B	29.6759
Sample Name	Detector Name	Ct	Detector Name	Ct	AveCt(let-7)	AveCt(RNU6B)	dCt	ddCt			relative expression	Ave (relative)	SE	p-value
Wt1	let-7g	33.4942	RNU6B	29.7427	33.3215	29.654	3.66746	0	1	0.919961	1.087	1	0.0835752
Wt1	let-7g	33.1488	RNU6B	29.5654
Wt2	let-7g	33.9065	RNU6B	29.9826	33.8291	29.7775	4.05161	0.384146	0.766232		0.832897
Wt2	let-7g	33.7516	RNU6B	29.5723
Wt3	let-7g	33.5216	RNU6B	29.9112	33.625	29.9483	3.67665	0.0091915	0.993649		1.0801
Wt3	let-7g	33.7283	RNU6B	29.9855
KO1	let-7g	29.8464	RNU6B	29.8165	29.8376	29.6445	0.193113	-3.47435	11.1143		12.0813	11.7509	0.55493	4.3748e-05
KO1	let-7g	29.8289	RNU6B	29.4726
KO2	let-7g	29.9481	RNU6B	29.6296	30.0031	29.6305	0.372588	-3.29487	9.81423		10.6681
KO2	let-7g	30.058	RNU6B	29.6313
KO3	let-7g	29.7278	RNU6B	29.5953	29.7792	29.6356	0.143587	-3.52388	11.5025		12.5033
KO3	let-7g	29.8305	RNU6B	29.6759
Sample Name	Detector Name	Ct	Detector Name	Ct	AveCt(let-7)	AveCt(RNU6B)	dCt	ddCt			relative expression	Ave (relative)	SE	p-value
Wt1	let-7i	33.9696	RNU6B	29.7427	33.7993	29.654	4.14528	0	1	1.08891	0.918351	1	0.0600555
Wt1	let-7i	33.629	RNU6B	29.5654
Wt2	let-7i	33.5836	RNU6B	29.9826	33.852	29.7775	4.0745	-0.0707865	1.05029		0.964535
Wt2	let-7i	34.1203	RNU6B	29.5723
Wt3	let-7i	33.8478	RNU6B	29.9112	33.811	29.9483	3.86262	-0.282658	1.21643		1.11711
Wt3	let-7i	33.7741	RNU6B	29.9855
KO1	let-7i	29.2807	RNU6B	29.8165	29.2487	29.6445	-0.395825	-4.54111	23.2814		21.3805	19.7339	0.836051	2.3728e-05
KO1	let-7i	29.2167	RNU6B	29.4726
KO2	let-7i	29.5304	RNU6B	29.6296	29.4311	29.6305	-0.199369	-4.34465	20.3175		18.6586
KO2	let-7i	29.3318	RNU6B	29.6313
KO3	let-7i	29.2967	RNU6B	29.5953	29.3978	29.6356	-0.237829	-4.38311	20.8664		19.1627
KO3	let-7i	29.4989	RNU6B	29.6759
Sample Name	Detector Name	Ct	Detector Name	Ct	AveCt(let-7)	AveCt(RNU6B)	dCt	ddCt			relative expression	Ave (relative)	SE	p-value
Wt1	mir-98	36.9632	RNU6B	29.7427	36.2307	29.654	6.57666	0	1	1.14882	0.87046	1	0.138842
Wt1	mir-98	35.4982	RNU6B	29.5654
Wt2	mir-98	36.4692	RNU6B	29.9826	36.3849	29.7775	6.60748	0.0308215	0.978863		0.85206
Wt2	mir-98	36.3007	RNU6B	29.5723
Wt3	mir-98	35.7734	RNU6B	29.9112	35.9715	29.9483	6.02321	-0.553451	1.46759		1.27748
Wt3	mir-98	36.1697	RNU6B	29.9855
KO1	mir-98	31.7286	RNU6B	29.8165	31.6215	29.6445	1.97696	-4.5997	24.2464		21.1055	15.1351	4.59727	0.0371742
KO1	mir-98	31.5144	RNU6B	29.4726
KO2	mir-98	31.8315	RNU6B	29.6296	31.8207	29.6305	2.1902	-4.38646	20.9149		18.2056
KO2	mir-98	31.8099	RNU6B	29.6313
KO3	mir-98	34.7494	RNU6B	29.5953	33.4046	29.6356	3.76905	-2.80761	7.00125		6.0943
KO3	mir-98	32.0598	RNU6B	29.6759
Sample Name	Detector Name	Ct	Detector Name	Ct	AveCt(let-7)	AveCt(RNU6B)	dCt	ddCt			relative expression	Ave (relative)	SE	p-value
Wt1	mir-9	28.9337	RNU6B	29.7427	28.8777	29.654	-0.776339	0	1	0.633828	1.57771	1	0.334706
Wt1	mir-9	28.8217	RNU6B	29.5654
Wt2	mir-9	31.0002	RNU6B	29.9826	30.9164	29.7775	1.13896	1.9153	0.265117		0.418279
Wt2	mir-9	30.8327	RNU6B	29.5723
Wt3	mir-9	29.9012	RNU6B	29.9112	29.8241	29.9483	-0.124273	0.652067	0.636368		1.00401
Wt3	mir-9	29.7469	RNU6B	29.9855
KO1	mir-9	27.561	RNU6B	29.8165	27.5488	29.6445	-2.09568	-1.31934	2.49552		3.93722	3.64527	0.16607	0.00210099
KO1	mir-9	27.5367	RNU6B	29.4726
KO2	mir-9	27.6367	RNU6B	29.6296	27.6494	29.6305	-1.98103	-1.2047	2.30489		3.63645
KO2	mir-9	27.6621	RNU6B	29.6313
KO3	mir-9	27.7757	RNU6B	29.5953	27.7677	29.6356	-1.86788	-1.09154	2.13102		3.36214
KO3	mir-9	27.7597	RNU6B	29.6759
Sample Name	Detector Name	Ct	Detector Name	Ct	AveCt(let-7)	AveCt(RNU6B)	dCt	ddCt			relative expression	Ave (relative)	SE	p-value
Wt1	mir-137	33.8792	RNU6B	29.7427	33.9275	29.654	4.27352	0	1	0.904544	1.10553	1	0.129444
Wt1	mir-137	33.9759	RNU6B	29.5654
Wt2	mir-137	34.5374	RNU6B	29.9826	34.6252	29.7775	4.84779	0.574269	0.671626		0.742503
Wt2	mir-137	34.7131	RNU6B	29.5723
Wt3	mir-137	34.0645	RNU6B	29.9112	34.1625	29.9483	4.21416	-0.059361	1.042		1.15197
Wt3	mir-137	34.2604	RNU6B	29.9855
KO1	mir-137	32.8714	RNU6B	29.8165	33.2374	29.6445	3.59284	-0.680681	1.6029		1.77205	2.4009	0.316563	0.0149
KO1	mir-137	33.6033	RNU6B	29.4726
KO2	mir-137	32.7219	RNU6B	29.6296	32.5742	29.6305	2.94374	-1.32978	2.51365		2.77891
KO2	mir-137	32.4265	RNU6B	29.6313
KO3	mir-137	32.4507	RNU6B	29.5953	32.6469	29.6356	3.01131	-1.26221	2.39862		2.65175
KO3	mir-137	32.8431	RNU6B	29.6759
Sample Name	Detector Name	Ct	Detector Name	Ct	AveCt(let-7)	AveCt(RNU6B)	dCt	ddCt			relative expression	Ave (relative)	SE	p-value
Wt1	mir-184	37.5847	RNU6B	29.7427	37.8453	29.654	8.19124	0	1	1.19397	0.837545	1	0.444606
Wt1	mir-184	38.1059	RNU6B	29.5654
Wt2	mir-184	38.9376	RNU6B	29.9826	39.3384	29.7775	9.56093	1.36969	0.386975		0.324109
Wt2	mir-184	39.7392	RNU6B	29.5723
Wt3	mir-184	36.6602	RNU6B	29.9112	37.0054	29.9483	7.05707	-1.13417	2.19492		1.83835
Wt3	mir-184	37.3506	RNU6B	29.9855
KO1	mir-184	37.9499	RNU6B	29.8165	36.8304	29.6445	7.18589	-1.00535	2.00744		1.68132	0.883646	0.400304	0.855273
KO1	mir-184	35.7109	RNU6B	29.4726
KO2	mir-184	40	RNU6B	29.6296	38.4439	29.6305	8.81348	0.622234	0.649664		0.544123
KO2	mir-184	36.8879	RNU6B	29.6313
KO3	mir-184	37.6077	RNU6B	29.5953	38.8038	29.6356	9.16826	0.977018	0.508029		0.425497
KO3	mir-184	40	RNU6B	29.6759

## Sheet: Hox-mir qPCR
Sample Name	Detector Name	Ct	Detector Name	Ct	Ave(Hox-mir)	Ave(b-actin)	dCT	ddCt			relative expression	Ave(relative)	SE	p-value
Wt1	mir-10a	26.2109	RNU6B	29.7738	26.0402	29.5228	-3.4826	0	1	0.925724	1.08024	1	0.0789661
Wt1	mir-10a	25.8695	RNU6B	29.2718
Wt2	mir-10a	26.1448	RNU6B	29.4375	26.0304	29.5096	-3.47919	0.003405	0.997643		1.07769
Wt2	mir-10a	25.916	RNU6B	29.5817
Wt3	mir-10a	26.2064	RNU6B	29.1226	26.1846	29.3079	-3.12327	0.359326	0.779528		0.842075
Wt3	mir-10a	26.1628	RNU6B	29.4931
KO1	mir-10a	26.058	RNU6B	28.9052	26.0626	28.8992	-2.83657	0.646023	0.639039		0.690313	0.777241	0.0674379	0.0985177
KO1	mir-10a	26.0672	RNU6B	28.8932
KO2	mir-10a	26.2349	RNU6B	29.6153	26.3952	29.6304	-3.23521	0.247384	0.842422		0.910015
KO2	mir-10a	26.5554	RNU6B	29.6455
KO3	mir-10a	26.834	RNU6B	29.9283	27.0019	29.9219	-2.91997	0.562624	0.677069		0.731395
KO3	mir-10a	27.1697	RNU6B	29.9154
Sample Name	Detector Name	Ct	Detector Name	Ct	Ave(Hox-mir)	Ave(b-actin)	dCT	ddCt			relative expression	Ave(relative)	SE	p-value
Wt1	mir-10b	26.3465	RNU6B	29.7738	26.0571	29.5228	-3.46567	0	1	0.933073	1.07173	1	0.143066
Wt1	mir-10b	25.7677	RNU6B	29.2718
Wt2	mir-10b	25.8154	RNU6B	29.4375	25.876	29.5096	-3.63359	-0.167923	1.12344		1.20402
Wt2	mir-10b	25.9366	RNU6B	29.5817
Wt3	mir-10b	26.3958	RNU6B	29.1226	26.4076	29.3079	-2.90029	0.565375	0.67578		0.724252
Wt3	mir-10b	26.4194	RNU6B	29.4931
KO1	mir-10b	25.9654	RNU6B	28.9052	25.9372	28.8992	-2.96201	0.503657	0.705316		0.755907	1.26421	0.260943	0.424796
KO1	mir-10b	25.909	RNU6B	28.8932
KO2	mir-10b	25.8464	RNU6B	29.6153	25.7629	29.6304	-3.86745	-0.401785	1.32114		1.4159
KO2	mir-10b	25.6794	RNU6B	29.6455
KO3	mir-10b	25.7253	RNU6B	29.9283	25.8594	29.9219	-4.06245	-0.596779	1.51234		1.62081
KO3	mir-10b	25.9935	RNU6B	29.9154
Sample Name	Detector Name	Ct	Detector Name	Ct	Ave(Hox-mir)	Ave(b-actin)	dCT	ddCt			relative expression	Ave(relative)	SE	p-value
Wt1	mir-196a	26.0096	RNU6B	29.7738	25.836	29.5228	-3.68679	0	1	0.916272	1.09138	1	0.107022
Wt1	mir-196a	25.6625	RNU6B	29.2718
Wt2	mir-196a	25.7308	RNU6B	29.4375	25.783	29.5096	-3.72662	-0.0398375	1.028		1.12194
Wt2	mir-196a	25.8351	RNU6B	29.5817
Wt3	mir-196a	26.1038	RNU6B	29.1226	26.0934	29.3079	-3.21449	0.472295	0.720817		0.786685
Wt3	mir-196a	26.0829	RNU6B	29.4931
KO1	mir-196a	25.9259	RNU6B	28.9052	25.7579	28.8992	-3.14128	0.545508	0.68515		0.747758	1.22128	0.296404	0.521282
KO1	mir-196a	25.5899	RNU6B	28.8932
KO2	mir-196a	25.9732	RNU6B	29.6153	25.8692	29.6304	-3.76122	-0.0744345	1.05295		1.14917
KO2	mir-196a	25.7651	RNU6B	29.6455
KO3	mir-196a	25.6835	RNU6B	29.9283	25.54	29.9219	-4.38186	-0.695073	1.61897		1.76691
KO3	mir-196a	25.3964	RNU6B	29.9154
Sample Name	Detector Name	Ct	Detector Name	Ct	Ave(Hox-mir)	Ave(b-actin)	dCT	ddCt			relative expression	Ave(relative)	SE	p-value
Wt1	mir-196b	28.2146	RNU6B	29.7738	28.0981	29.5228	-1.42468	0	1	0.921409	1.08529	1	0.165652
Wt1	mir-196b	27.9817	RNU6B	29.2718
Wt2	mir-196b	27.8468	RNU6B	29.4375	27.899	29.5096	-1.61063	-0.185955	1.13757		1.2346
Wt2	mir-196b	27.9512	RNU6B	29.5817
Wt3	mir-196b	28.5844	RNU6B	29.1226	28.5575	29.3079	-0.750424	0.674255	0.626656		0.680106
Wt3	mir-196b	28.5305	RNU6B	29.4931
KO1	mir-196b	28.812	RNU6B	28.9052	28.6702	28.8992	-0.228968	1.19571	0.436571		0.473809	0.665556	0.10909	0.167043
KO1	mir-196b	28.5284	RNU6B	28.8932
KO2	mir-196b	28.9195	RNU6B	29.6153	28.8988	29.6304	-0.731581	0.693098	0.618524		0.671281
KO2	mir-196b	28.8781	RNU6B	29.6455
KO3	mir-196b	28.9158	RNU6B	29.9283	28.8471	29.9219	-1.0748	0.349877	0.784651		0.851578
KO3	mir-196b	28.7783	RNU6B	29.9154

## Sheet: Luc assay
		F	R	F/R		Reletive luc actibity	Ave(relative)	SE	p-value
pLuc2	mir-424	1574.5	816	1.92953	1.94114	0.994022	1	0.0173387
		1667.5	882.5	1.88952		0.973407
		1378	687.5	2.00436		1.03257
	let-7	1256	604.5	2.07775		1.07038	1.00833	0.0310427	0.826316
		1310.5	689.5	1.90065		0.979143
		1138	601	1.89351		0.975464
let-7 Sensor	mir-424	400.5	402	0.996269	0.912409	1.09191	1	0.0590526
		386.5	416	0.929087		1.01828
		403.5	497	0.811871		0.889811
	let-7	158.5	394	0.402284		0.440904	0.396588	0.0346678	0.000915109
		139.5	363.5	0.383769		0.420611
		149	497.5	0.299497		0.328249
Arl4d Wt	mir-424	2758.5	469	5.88166	6.36588	0.923936	1	0.0569657
		3346.5	545	6.14037		0.964575
		2480	350.5	7.07561		1.11149
	let-7	2330	374	6.22995		0.978647	0.920043	0.0362192	0.301799
		2675	453	5.90508		0.927614
		2701.5	497	5.43561		0.853867
Arl4d Mut	mir-424	1726	444	3.88739	3.99101	0.974035	1	0.0131562
		1792.5	445	4.02809		1.00929
		1797.5	443	4.05756		1.01667
	let-7	1253.5	318.5	3.93564		0.986124	0.981635	0.00299682	0.245122
		1265	322.5	3.92248		0.982828
		1725.5	443	3.89503		0.975951
Cbx2 Wt	mir-424	2520	626.5	4.02235	4.33737	0.927371	1	0.03807
		1972	430.5	4.58072		1.05611
		1757	398.5	4.40903		1.01652
	let-7	1374	444.5	3.09111		0.712671	0.708121	0.0232438	0.00281908
		1100	340	3.23529		0.745912
		1800.5	623.5	2.88773		0.66578
Cbx2 Mut	mir-424	2758.5	437	6.31236	6.86521	0.919471	1	0.0417198
		2387.5	340.5	7.01175		1.02135
		2450.5	337	7.27151		1.05918
	let-7	2619.5	400	6.54875		0.953904	0.978742	0.0365483	0.721012
		2993.5	415	7.21325		1.0507
		2731	427	6.39578		0.931623
Cbx5 #1 Wt	mir-424	3175.5	468	6.78526	6.27323	1.08162	1	0.0481461
		3075	488.5	6.29478		1.00344
		3814	664.5	5.73965		0.914944
	let-7	1553	411	3.77859		0.602335	0.611169	0.0170951	0.00159986
		1473	364.5	4.04115		0.64419
		1848.5	502	3.68227		0.586982
Cbx5 #1 Mut	mir-424	2464	496	4.96774	5.26341	0.943825	1	0.0282616
		3200	594.5	5.38267		1.02266
		2418	444.5	5.43982		1.03352
	let-7	1835.5	372.5	4.92752		0.936183	0.905964	0.0306968	0.0872887
		2266.5	459.5	4.93254		0.937136
		2216	498.5	4.44534		0.844573
Cbx5 #2 Wt	mir-424	3171	550	5.76545	5.20867	1.10689	1	0.0567621
		2878.5	605	4.75785		0.913448
		3005.5	589	5.10272		0.979657
	let-7	2608.5	654.5	3.98549		0.765163	0.813245	0.0253467	0.039776
		2466	575	4.2887		0.823376
		3338.5	753	4.4336		0.851195
Cbx5 #2 Mut	mir-424	2248.5	523.5	4.29513	4.61569	0.93055	1	0.041642
		2128.5	463.5	4.59223		0.994918
		2400.5	484	4.95971		1.07453
	let-7	1567	372.5	4.20671		0.911394	0.962148	0.0291671	0.497925
		2130.5	479.5	4.44317		0.962623
		2072.5	443.5	4.67306		1.01243
Dusp4 Wt	mir-424	1922	534.5	3.59588	4.03609	0.890933	1	0.0556389
		2424.5	559.5	4.33333		1.07365
		1715.5	410.5	4.17905		1.03542
	let-7	1616.5	432.5	3.73757		0.926038	0.912144	0.00992133	0.195031
		1683	454.5	3.70297		0.917465
		2470.5	685.5	3.60394		0.892928
Dusp4 Mut	mir-424	2123	421.5	5.03677	4.77509	1.0548	1	0.0517525
		1359.5	271.5	5.00737		1.04864
		1804.5	421.5	4.28114		0.896556
	let-7	1179	261.5	4.5086		0.944192	0.938067	0.00730596	0.301623
		1787.5	395.5	4.5196		0.946494
		1920.5	435.5	4.40987		0.923516
E2f6 Wt	mir-424	5158.5	492	10.4848	11.4638	0.914594	1	0.049689
		3417.5	298.5	11.4489		0.998698
		3102	249	12.4578		1.08671
	let-7	3314.5	401.5	8.25529		0.720116	0.766248	0.0237357	0.0132122
		2855.5	319.5	8.9374		0.779617
		3412	372.5	9.15973		0.799011
E2f6 Mut	mir-424	2278.5	443	5.14334	5.49927	0.935277	1	0.0339917
		2248	403	5.57816		1.01435
		2388.5	413.5	5.7763		1.05038
	let-7	2522.5	417	6.04916		1.09999	1.09073	0.00976762	0.062288
		2374	403	5.89082		1.0712
		2715.5	448.5	6.05463		1.10099

## Sheet: let-7 target qPCR
Sample Name	Target Name	CT	Target Name	CT	Ave(candidate)	Ave(b-actin)	dCT	ddCt			relative expression	Ave(relative)	SE	p-value
Wt1	Arl4d	25.89	actb	20.825	25.9575	19.6435	6.314	0	1	1.07568	0.929646	1	0.107458
Wt1	Arl4d	26.025	actb	18.462
Wt2	Arl4d	26.23	actb	19.984	26.012	20.0795	5.9325	-0.381498	1.30269		1.21104
Wt2	Arl4d	25.794	actb	20.175
Wt3	Arl4d	25.999	actb	19.401	25.9045	19.477	6.4275	0.113502	0.924342		0.85931
Wt3	Arl4d	25.81	actb	19.553
KO1	Arl4d	26.259	actb	18.319	26.3665	17.7215	8.645	2.331	0.198746		0.184763	0.370301	0.0927954	0.0113766
KO1	Arl4d	26.474	actb	17.124
KO2	Arl4d	26.457	actb	18.883	26.4085	19.101	7.3075	0.993502	0.502257		0.466921
KO2	Arl4d	26.36	actb	19.319
KO3	Arl4d	26.323	actb	19.638	26.409	19.0775	7.3315	1.0175	0.493971		0.459218
KO3	Arl4d	26.495	actb	18.517
Wt1	Cbx5	21.559	actb	20.825	23.659	19.6435	4.0155	0	1	0.570071	1.75417	1	0.37722
Wt1	Cbx5	25.759	actb	18.462
Wt2	Cbx5	24.936	actb	19.984	25.63	20.0795	5.5505	1.535	0.345079		0.605326
Wt2	Cbx5	26.324	actb	20.175
Wt3	Cbx5	24.694	actb	19.401	24.946	19.477	5.469	1.4535	0.365134		0.640507
Wt3	Cbx5	25.198	actb	19.553
KO1	Cbx5	25.282	actb	18.319	24.779	17.7215	7.0575	3.042	0.121414		0.21298	0.947724	0.508839	0.93819
KO1	Cbx5	24.276	actb	17.124
KO2	Cbx5	22.677	actb	18.883	22.9825	19.101	3.8815	-0.134	1.09733		1.9249
KO2	Cbx5	23.288	actb	19.319
KO3	Cbx5	24.249	actb	19.638	24.4075	19.0775	5.33	1.3145	0.402065		0.705289
KO3	Cbx5	24.566	actb	18.517
Wt1	Dusp4	32.679	actb	20.825	32.3905	19.6435	12.747	0	1	1.57441	0.635159	1	0.496177
Wt1	Dusp4	32.102	actb	18.462
Wt2	Dusp4	33.35	actb	19.984	33.5555	20.0795	13.476	0.729	0.603322		0.383206
Wt2	Dusp4	33.761	actb	20.175
Wt3	Dusp4	30.717	actb	19.401	30.5825	19.477	11.1055	-1.6415	3.1199		1.98163
Wt3	Dusp4	30.448	actb	19.553
KO1	Dusp4	30.358	actb	18.319	30.1895	17.7215	12.468	-0.279001	1.21335		0.770674	1.70717	0.639008	0.431406
KO1	Dusp4	30.021	actb	17.124
KO2	Dusp4	28.848	actb	18.883	29.643	19.101	10.542	-2.205	4.61075		2.92856
KO2	Dusp4	30.438	actb	19.319
KO3	Dusp4	31.186	actb	19.638	30.6615	19.0775	11.584	-1.163	2.23923		1.42227
KO3	Dusp4	30.137	actb	18.517
Wt1	E2f6	23.609	actb	20.825	24.591	19.6435	4.9475	0	1	0.764233	1.3085	1	0.180765
Wt1	E2f6	25.573	actb	18.462
Wt2	E2f6	25.853	actb	19.984	25.966	20.0795	5.8865	0.939002	0.521594		0.682506
Wt2	E2f6	26.079	actb	20.175
Wt3	E2f6	25.254	actb	19.401	24.7995	19.477	5.3225	0.375001	0.771105		1.00899
Wt3	E2f6	24.345	actb	19.553
KO1	E2f6	24.598	actb	18.319	24.7935	17.7215	7.072	2.1245	0.22933		0.300079	0.996447	0.395648	0.993874
KO1	E2f6	24.989	actb	17.124
KO2	E2f6	23.612	actb	18.883	23.6965	19.101	4.5955	-0.351999	1.27633		1.67008
KO2	E2f6	23.781	actb	19.319
KO3	E2f6	24.5	actb	19.638	24.3855	19.0775	5.308	0.3605	0.778894		1.01918
KO3	E2f6	24.271	actb	18.517

## Sheet: let-7 target western
Lin28a	intensity(target)	intensity(b-actin)	taget/b-actin		relative expression	Ave(relative)	SE	p-value
Wt1	46597	46592	1.00011	0.873937	1.14437	1	0.200369
Wt2	35738	67696	0.527919		0.60407
Wt3	53240	48675	1.09379		1.25156
KO1	489	71933	0.00679799		0.00777858	0.011737	0.00557789	0.00787111
KO2	1146	57643	0.019881		0.0227488
KO3	273	66695	0.00409326		0.0046837
Arl4d	intensity(target)	intensity(b-actin)	taget/b-actin		relative expression	Ave(relative)	SE	p-value
Wt1	26022	46592	0.558508	0.316759	1.76319	1	0.385463
Wt2	11238	67696	0.166007		0.524079
Wt3	10989	48675	0.225763		0.712727
KO1	37430	71933	0.520345		1.64272	1.30999	0.425179	0.617759
KO2	33256	57643	0.57693		1.82135
KO3	9843	66695	0.147582		0.465913
Cbx2	intensity(target)	intensity(b-actin)	taget/b-actin		relative expression	Ave(relative)	SE	p-value
Wt1	77557	46592	1.6646	1.61145	1.03298	1	0.115714
Wt2	85649	67696	1.2652		0.785132
Wt3	92704	48675	1.90455		1.18189
KO1	80001	71933	1.11216		0.690161	0.550722	0.081676	0.0337912
KO2	51525	57643	0.893864		0.554695
KO3	43776	66695	0.656361		0.407311
Cbx5	intensity(target)	intensity(b-actin)	taget/b-actin		relative expression	Ave(relative)	SE	p-value
Wt1	22589	46592	0.484826	0.530271	0.914297	1	0.164495
Wt2	27561	67696	0.407129		0.767775
Wt3	34017	48675	0.69886		1.31793
KO1	31598	71933	0.43927		0.828387	1.01647	0.108271	0.937372
KO2	36785	57643	0.638152		1.20344
KO3	35988	66695	0.539591		1.01757
Dusp4	intensity(target)	intensity(b-actin)	taget/b-actin		relative expression	Ave(relative)	SE	p-value
Wt1	25405	46592	0.545265	0.563352	0.967895	1	0.199903
Wt2	25587	67696	0.377969		0.670929
Wt3	37325	48675	0.766821		1.36118
KO1	50869	71933	0.707172		1.25529	1.12785	0.0641408	0.575441
KO2	34966	57643	0.606596		1.07676
KO3	39507	66695	0.592353		1.05148
E2f6	intensity(target)	intensity(b-actin)	taget/b-actin		relative expression	Ave(relative)	SE	p-value
Wt1	29481	46592	0.632748	0.42522	1.48805	1	0.244442
Wt2	21049	67696	0.310934		0.731231
Wt3	16159	48675	0.331977		0.780719
KO1	23424	71933	0.325636		0.765807	0.970966	0.276445	0.941067
KO2	37212	57643	0.64556		1.51818
KO3	17836	66695	0.267426		0.628913
