# Supplementary material for: Lin28a/let-7 pathway modulates the Hox code via Polycomb regulation during axial patterning in vertebrates
Source: eLife. 2020 May 29;9:e53608. doi: 10.7554/eLife.53608 (PMC7259951; doi:10.7554/eLife.53608)
Supplement: Figure 4—source data 1. [file elife-53608-fig4-data1.xlsx]

## Sheet: H3K27me3 ChIP Wt
Sample Name	Detector Name	Ct
IgG	Hoxa1	35.9514	36.2799	0	1
IgG	Hoxa1	36.6084
H3K27me3	Hoxa1	33.6706	35.3049	-0.975001	1.96564
H3K27me3	Hoxa1	36.9392
IgG	Hoxa2	34.3755	34.1533	0	1
IgG	Hoxa2	33.9312
H3K27me3	Hoxa2	33.6421	33.4155	-0.737828	1.66766
H3K27me3	Hoxa2	33.1889
IgG	Hoxa3	38.8823	37.3139	0	1
IgG	Hoxa3	35.7455
H3K27me3	Hoxa3	30.3644	30.4635	-6.8504	115.392
H3K27me3	Hoxa3	30.5626
IgG	Hoxa4	36.6359	36.9808	0	1
IgG	Hoxa4	37.3258
H3K27me3	Hoxa4	33.1574	33.2275	-3.75336	13.4857
H3K27me3	Hoxa4	33.2976
IgG	Hoxa5	34.6396	35.2885	0	1
IgG	Hoxa5	35.9374
H3K27me3	Hoxa5	31.6673	31.5871	-3.70147	13.0093
H3K27me3	Hoxa5	31.5068
IgG	Hoxa6	34.9424	35.4395	0	1
IgG	Hoxa6	35.9366
H3K27me3	Hoxa6	31.0988	31.131	-4.30846	19.8142
H3K27me3	Hoxa6	31.1633
IgG	Hoxa7	33.9191	34.191	0	1
IgG	Hoxa7	34.4629
H3K27me3	Hoxa7	30.9286	30.9105	-3.28047	9.71674
H3K27me3	Hoxa7	30.8924
IgG	Hoxa9	34.9392	35.1647	0	1
IgG	Hoxa9	35.3903
H3K27me3	Hoxa9	29.9622	29.7364	-5.42832	43.0614
H3K27me3	Hoxa9	29.5105
IgG	Hoxa10	37.0952	36.4064	0	1
IgG	Hoxa10	35.7177
H3K27me3	Hoxa10	30.7282	30.914	-5.49243	45.018
H3K27me3	Hoxa10	31.0998
IgG	Hoxa11	32.9368	32.9368	0	1
IgG	Hoxa11	36.994
H3K27me3	Hoxa11	25.8372	25.7495	-7.18736	145.751
H3K27me3	Hoxa11	25.6617
IgG	Hoxa13	36.9701	36.8527	0	1
IgG	Hoxa13	36.8527
H3K27me3	Hoxa13	31.0605	31.129	-5.72373	52.8464
H3K27me3	Hoxa13	31.1974

## Sheet: ChIP Wt Lin28aKO 1
Sample Name	Target Name	CT	Sample Name	CT	dCT		%	Ave	SE	p-value
Wt IgG1	Actb	40	Wt input1	32.482	7.518	0.00545577	0.545577	0.282995	0.132894
Wt IgG2	Actb	40	Wt input2	30.94	9.06	0.00187356	0.187356
Wt IgG3	Actb	39.148	Wt input3	29.397	9.751	0.00116053	0.116053
Wt K27 1	Actb	40	Wt input1	32.482	7.518	0.00545577	0.545577	0.265743	0.144356
Wt K27 2	Actb	40	Wt input2	30.94	9.06	0.00187356	0.187356
Wt K27 3	Actb	40	Wt input3	29.397	10.603	0.000642952	0.0642952
Wt K4 1	Actb	34.701	Wt input1	32.482	2.219	0.21479	21.479	22.7116	0.814044
Wt K4 2	Actb	33.098	Wt input2	30.94	2.158	0.224067	22.4067
Wt K4 3	Actb	31.441	Wt input3	29.397	2.044	0.24249	24.249
KO IgG1	Actb	40	KO input1	30.106	9.894	0.00105102	0.105102	0.493419	0.306336
KO IgG2	Actb	38.758	KO input2	32.249	6.509	0.0109798	1.09798
KO IgG3	Actb	40	KO input3	31.505	8.495	0.00277172	0.277172
KO K27 1	Actb	38.806	KO input1	30.106	8.7	0.00240458	0.240458	0.327281	0.0692812	0.720297
KO K27 2	Actb	40	KO input2	32.249	7.751	0.00464212	0.464212
KO K27 3	Actb	40	KO input3	31.505	8.495	0.00277172	0.277172
KO K4 1	Actb	33.644	KO input1	30.106	3.538	0.0860906	8.60906	19.9871	5.68903	0.660171
KO K4 2	Actb	34.21	KO input2	32.249	1.961	0.256851	25.6851
KO K4 3	Actb	33.467	KO input3	31.505	1.962	0.256672	25.6672
Wt IgG1	Hoxa1	32.527	Wt input1	22.629	9.898	0.00104811	0.104811	0.120802	0.0745517
Wt IgG2	Hoxa1	40	Wt input2	22.124	17.876	4.15708e-06	0.000415708
Wt IgG3	Hoxa1	32.094	Wt input3	23.491	8.603	0.00257181	0.257181
Wt K27 1	Hoxa1	35.63	Wt input1	22.629	13.001	0.000121986	0.0121986	0.0437742	0.0296045
Wt K27 2	Hoxa1	34.717	Wt input2	22.124	12.593	0.000161856	0.0161856
Wt K27 3	Hoxa1	33.415	Wt input3	23.491	9.924	0.00102938	0.102938
Wt K4 1	Hoxa1	25.173	Wt input1	22.629	2.544	0.171467	17.1467	29.6493	13.5902
Wt K4 2	Hoxa1	24.861	Wt input2	22.124	2.737	0.149996	14.9996
Wt K4 3	Hoxa1	24.307	Wt input3	23.491	0.816	0.568015	56.8015
KO IgG1	Hoxa1	37.481	KO input1	22.858	14.623	3.96313e-05	0.00396313	0.00940174	0.00272306
KO IgG2	Hoxa1	37.152	KO input2	24.171	12.981	0.000123689	0.0123689
KO IgG3	Hoxa1	36.527	KO input3	23.487	13.04	0.000118732	0.0118732
KO K27 1	Hoxa1	40	KO input1	22.858	17.142	6.91423e-06	0.000691423	0.126858	0.0632505	0.299953
KO K27 2	Hoxa1	33.273	KO input2	24.171	9.102	0.00181981	0.181981
KO K27 3	Hoxa1	32.468	KO input3	23.487	8.981	0.00197902	0.197902
KO K4 1	Hoxa1	24.601	KO input1	22.858	1.743	0.298748	29.8748	39.8266	15.2581	0.644564
KO K4 2	Hoxa1	24.69	KO input2	24.171	0.519001	0.697855	69.7855
KO K4 3	Hoxa1	25.822	KO input3	23.487	2.335	0.198196	19.8196
Wt IgG1	Hoxa3	33.98	Wt input1	24.699	9.281	0.00160746	0.160746	0.392022	0.121166
Wt IgG2	Hoxa3	33.898	Wt input2	26.444	7.454	0.00570326	0.570326
Wt IgG3	Hoxa3	34.045	Wt input3	26.233	7.812	0.00444994	0.444994
Wt K27 1	Hoxa3	31.552	Wt input1	24.699	6.853	0.0086505	0.86505	2.87113	1.12238
Wt K27 2	Hoxa3	30.841	Wt input2	26.444	4.397	0.0474648	4.74648
Wt K27 3	Hoxa3	31.291	Wt input3	26.233	5.058	0.0300186	3.00186
Wt K4 1	Hoxa3	28.027	Wt input1	24.699	3.328	0.0995799	9.95799	17.4726	4.52461
Wt K4 2	Hoxa3	28.41	Wt input2	26.444	1.966	0.255962	25.5962
Wt K4 3	Hoxa3	28.801	Wt input3	26.233	2.568	0.168638	16.8638
KO IgG1	Hoxa3	35.517	KO input1	26.338	9.179	0.00172523	0.172523	0.302066	0.0777428
KO IgG2	Hoxa3	35.043	KO input2	26.625	8.418	0.00292368	0.292368
KO IgG3	Hoxa3	33.962	KO input3	26.138	7.824	0.00441307	0.441307
KO K27 1	Hoxa3	30.536	KO input1	26.338	4.198	0.0544849	5.44849	5.82339	0.461097	0.0717445
KO K27 2	Hoxa3	30.868	KO input2	26.625	4.243	0.0528116	5.28116
KO K27 3	Hoxa3	30.029	KO input3	26.138	3.891	0.0674051	6.74051
KO K4 1	Hoxa3	28.561	KO input1	26.338	2.223	0.214195	21.4195	19.4623	2.79624	0.727336
KO K4 2	Hoxa3	28.744	KO input2	26.625	2.119	0.230207	23.0207
KO K4 3	Hoxa3	28.98	KO input3	26.138	2.842	0.139468	13.9468
Wt IgG1	Hoxd3	39.051	Wt input1	27.961	11.09	0.000458752	0.0458752	0.256968	0.140168
Wt IgG2	Hoxd3	36.49	Wt input2	27.544	8.946	0.00202761	0.202761
Wt IgG3	Hoxd3	35.655	Wt input3	28.074	7.581	0.00522266	0.522266
Wt K27 1	Hoxd3	33.051	Wt input1	27.961	5.09	0.0293601	2.93601	2.6903	0.268587
Wt K27 2	Hoxd3	32.612	Wt input2	27.544	5.068	0.0298113	2.98113
Wt K27 3	Hoxd3	33.611	Wt input3	28.074	5.537	0.0215376	2.15376
Wt K4 1	Hoxd3	30.606	Wt input1	27.961	2.645	0.159873	15.9873	15.3599	1.38004
Wt K4 2	Hoxd3	30.519	Wt input2	27.544	2.975	0.127185	12.7185
Wt K4 3	Hoxd3	30.599	Wt input3	28.074	2.525	0.17374	17.374
KO IgG1	Hoxd3	40	KO input1	27.39	12.61	0.00015996	0.015996	0.12174	0.1052
KO IgG2	Hoxd3	35.878	KO input2	27.644	8.234	0.00332139	0.332139
KO IgG3	Hoxd3	40	KO input3	27.485	12.515	0.000170848	0.0170848
KO K27 1	Hoxd3	32.142	KO input1	27.39	4.752	0.0371113	3.71113	2.85347	0.598955	0.815922
KO K27 2	Hoxd3	32.633	KO input2	27.644	4.989	0.0314892	3.14892
KO K27 3	Hoxd3	33.363	KO input3	27.485	5.878	0.0170038	1.70038
KO K4 1	Hoxd3	30.63	KO input1	27.39	3.24	0.105843	10.5843	10.4946	2.87689	0.201991
KO K4 2	Hoxd3	31.837	KO input2	27.644	4.193	0.054674	5.4674
KO K4 3	Hoxd3	30.181	KO input3	27.485	2.696	0.15432	15.432
Wt IgG1	Hoxa11	34.817	Wt input1	25.653	9.164	0.00174325	0.174325	0.0784703	0.0482574
Wt IgG2	Hoxa11	37.428	Wt input2	26.151	11.277	0.000402981	0.0402981
Wt IgG3	Hoxa11	37.757	Wt input3	25.525	12.232	0.000207874	0.0207874
Wt K27 1	Hoxa11	30.141	Wt input1	25.653	4.488	0.0445633	4.45633	15.2263	5.41241
Wt K27 2	Hoxa11	28.365	Wt input2	26.151	2.214	0.215536	21.5536
Wt K27 3	Hoxa11	27.871	Wt input3	25.525	2.346	0.196691	19.6691
Wt K4 1	Hoxa11	28.222	Wt input1	25.653	2.569	0.168521	16.8521	25.4716	4.58441
Wt K4 2	Hoxa11	27.773	Wt input2	26.151	1.622	0.324884	32.4884
Wt K4 3	Hoxa11	27.41	Wt input3	25.525	1.885	0.270744	27.0744
KO IgG1	Hoxa11	36.083	KO input1	25.644	10.439	0.000720357	0.0720357	0.0566963	0.0278405
KO IgG2	Hoxa11	35.265	KO input2	25.231	10.034	0.000953818	0.0953818
KO IgG3	Hoxa11	40	KO input3	24.808	15.192	2.67148e-05	0.00267148
KO K27 1	Hoxa11	28.518	KO input1	25.644	2.874	0.136408	13.6408	10.3833	1.80379	0.443752
KO K27 2	Hoxa11	28.539	KO input2	25.231	3.308	0.10097	10.097
KO K27 3	Hoxa11	28.562	KO input3	24.808	3.754	0.0741197	7.41197
KO K4 1	Hoxa11	27.213	KO input1	25.644	1.569	0.337042	33.7042	21.6912	6.02466	0.643739
KO K4 2	Hoxa11	27.831	KO input2	25.231	2.6	0.164939	16.4939
KO K4 3	Hoxa11	27.557	KO input3	24.808	2.749	0.148754	14.8754
Wt IgG1	Hoxc13	34.529	Wt input1	25.359	9.17	0.00173602	0.173602	0.0782477	0.0503398
Wt IgG2	Hoxc13	35.185	Wt input2	24.447	10.738	0.000585517	0.0585517
Wt IgG3	Hoxc13	40	Wt input3	24.763	15.237	2.58944e-05	0.00258944
Wt K27 1	Hoxc13	29.646	Wt input1	25.359	4.287	0.0512253	5.12253	5.25392	1.07
Wt K27 2	Hoxc13	28.249	Wt input2	24.447	3.802	0.0716942	7.16942
Wt K27 3	Hoxc13	29.612	Wt input3	24.763	4.849	0.0346981	3.46981
Wt K4 1	Hoxc13	28.632	Wt input1	25.359	3.273	0.10345	10.345	5.62698	2.49426
Wt K4 2	Hoxc13	30.192	Wt input2	24.447	5.745	0.0186459	1.86459
Wt K4 3	Hoxc13	29.183	Wt input3	24.763	4.42	0.046714	4.6714
KO IgG1	Hoxc13	40	KO input1	25.083	14.917	3.23248e-05	0.00323248	0.00311242	0.000203117
KO IgG2	Hoxc13	40	KO input2	24.832	15.168	2.7163e-05	0.0027163
KO IgG3	Hoxc13	40	KO input3	25.151	14.849	3.38848e-05	0.00338848
KO K27 1	Hoxc13	29.981	KO input1	25.083	4.898	0.0335394	3.35394	4.41505	0.96707	0.592016
KO K27 2	Hoxc13	29.65	KO input2	24.832	4.818	0.0354518	3.54518
KO K27 3	Hoxc13	29.129	KO input3	25.151	3.978	0.0634604	6.34604
KO K4 1	Hoxc13	30.071	KO input1	25.083	4.988	0.031511	3.1511	2.96852	0.697625	0.362699
KO K4 2	Hoxc13	30.728	KO input2	24.832	5.896	0.016793	1.6793
KO K4 3	Hoxc13	29.768	KO input3	25.151	4.617	0.0407516	4.07516
Wt IgG1	Hoxd12	40	Wt input1	23.794	16.206	1.32284e-05	0.00132284	0.00549397	0.00229806
Wt IgG2	Hoxd12	39.249	Wt input2	25.849	13.4	9.2512e-05	0.0092512
Wt IgG3	Hoxd12	40	Wt input3	25.953	14.047	5.90788e-05	0.00590788
Wt K27 1	Hoxd12	29.143	Wt input1	23.794	5.349	0.0245353	2.45353	7.66872	2.63909
Wt K27 2	Hoxd12	29.036	Wt input2	25.849	3.187	0.109804	10.9804
Wt K27 3	Hoxd12	29.338	Wt input3	25.953	3.385	0.0957224	9.57224
Wt K4 1	Hoxd12	31.574	Wt input1	23.794	7.78	0.00454974	0.454974	2.19076	1.23416
Wt K4 2	Hoxd12	31.871	Wt input2	25.849	6.022	0.0153885	1.53885
Wt K4 3	Hoxd12	30.402	Wt input3	25.953	4.449	0.0457844	4.57844
KO IgG1	Hoxd12	40	KO input1	25.415	14.585	4.06891e-05	0.00406891	0.037562	0.0342852
KO IgG2	Hoxd12	40	KO input2	24.707	15.293	2.49086e-05	0.00249086
KO IgG3	Hoxd12	36.089	KO input3	26.209	9.88	0.00106126	0.106126
KO K27 1	Hoxd12	29.286	KO input1	25.415	3.871	0.068346	6.8346	7.29349	1.90115	0.913715
KO K27 2	Hoxd12	29.262	KO input2	24.707	4.555	0.0425411	4.25411
KO K27 3	Hoxd12	29.421	KO input3	26.209	3.212	0.107917	10.7917
KO K4 1	Hoxd12	31.194	KO input1	25.415	5.779	0.0182116	1.82116	1.76515	0.361701	0.757304
KO K4 2	Hoxd12	31.197	KO input2	24.707	6.49	0.0111254	1.11254
KO K4 3	Hoxd12	31.613	KO input3	26.209	5.404	0.0236175	2.36175

## Sheet: ChIP Wt Lin28aKO 2
Sample Name	Target Name	CT	Sample Name	CT	Ave(ChIP)	Ave(input)	dCT		%	Ave	SE
Wt IgG 1	Hoxa1	34.052	Wt Input 1	23.156	34.1385	23.0145	11.124	0.000448067	0.0448067	0.0341905	0.00734062
Wt IgG 1	Hoxa1	34.225	Wt Input 1	22.873
Wt IgG 2	Hoxa1	34.026	Wt Input 2	23.339	34.5005	23.126	11.3745	0.000376647	0.0376647
Wt IgG 2	Hoxa1	34.975	Wt Input 2	22.913
Wt IgG 3	Hoxa1	34.328	Wt Input 3	23.04	35.4605	23.18	12.2805	0.000201003	0.0201003
Wt IgG 3	Hoxa1	36.593	Wt Input 3	23.32
Wt Cbx2 1	Hoxa1	32.299	Wt Input 1	23.156	32.1795	23.0145	9.165	0.00174205	0.174205	0.115619	0.0501281
Wt Cbx2 1	Hoxa1	32.06	Wt Input 1	22.873
Wt Cbx2 2	Hoxa1	31.884	Wt Input 2	23.339	35.7475	23.126	12.6215	0.00015869	0.015869
Wt Cbx2 2	Hoxa1	39.611	Wt Input 2	22.913
Wt Cbx2 3	Hoxa1	32.9	Wt Input 3	23.04	32.497	23.18	9.317	0.00156785	0.156785
Wt Cbx2 3	Hoxa1	32.094	Wt Input 3	23.32
Wt Ring1b 1	Hoxa1	32.513	Wt Input 1	23.156	32.436	23.0145	9.4215	0.0014583	0.14583	0.136396	0.0248639
Wt Ring1b 1	Hoxa1	32.359	Wt Input 1	22.873
Wt Ring1b 2	Hoxa1	33.015	Wt Input 2	23.339	33.2535	23.126	10.1275	0.000893962	0.0893962
Wt Ring1b 2	Hoxa1	33.492	Wt Input 2	22.913
Wt Ring1b 3	Hoxa1	32.207	Wt Input 3	23.04	32.347	23.18	9.167	0.00173963	0.173963
Wt Ring1b 3	Hoxa1	32.487	Wt Input 3	23.32
Wt H2A 1	Hoxa1	29.68	Wt Input 1	23.156	29.0655	23.0145	6.051	0.0150823	1.50823	1.45145	0.135934
Wt H2A 1	Hoxa1	28.451	Wt Input 1	22.873
Wt H2A 2	Hoxa1	28.854	Wt Input 2	23.339	29.0445	23.126	5.9185	0.0165331	1.65331
Wt H2A 2	Hoxa1	29.235	Wt Input 2	22.913
Wt H2A 3	Hoxa1	29.364	Wt Input 3	23.04	29.5695	23.18	6.3895	0.011928	1.1928
Wt H2A 3	Hoxa1	29.775	Wt Input 3	23.32
KO IgG 1	Hoxa1	33.002	KO Input 1	21.765	34.076	21.8375	12.2385	0.00020694	0.020694	0.0223421	0.0083065
KO IgG 1	Hoxa1	35.15	KO Input 1	21.91
KO IgG 2	Hoxa1	36.868	KO Input 2	21.603	35.3545	21.8905	13.464	8.84977e-05	0.00884977
KO IgG 2	Hoxa1	33.841	KO Input 2	22.178
KO IgG 3	Hoxa1	34.855	KO Input 3	22.699	33.8315	22.45	11.3815	0.000374824	0.0374824
KO IgG 3	Hoxa1	32.808	KO Input 3	22.201
KO Cbx2 1	Hoxa1	32.386	KO Input 1	21.765	33.97	21.8375	12.1325	0.000222717	0.0222717	0.0418796	0.016918
KO Cbx2 1	Hoxa1	35.554	KO Input 1	21.91
KO Cbx2 2	Hoxa1	33.832	KO Input 2	21.603	33.703	21.8905	11.8125	0.000278024	0.0278024
KO Cbx2 2	Hoxa1	33.574	KO Input 2	22.178
KO Cbx2 3	Hoxa1	31.976	KO Input 3	22.699	32.82	22.45	10.37	0.000755647	0.0755647
KO Cbx2 3	Hoxa1	33.664	KO Input 3	22.201
KO Ring1b 1	Hoxa1	32.635	KO Input 1	21.765	32.1255	21.8375	10.288	0.000799841	0.0799841	0.0981231	0.0334357
KO Ring1b 1	Hoxa1	31.616	KO Input 1	21.91
KO Ring1b 2	Hoxa1	32.442	KO Input 2	21.603	32.815	21.8905	10.9245	0.000514515	0.0514515
KO Ring1b 2	Hoxa1	33.188	KO Input 2	22.178
KO Ring1b 3	Hoxa1	32.398	KO Input 3	22.699	31.7115	22.45	9.2615	0.00162934	0.162934
KO Ring1b 3	Hoxa1	31.025	KO Input 3	22.201
KO H2A 1	Hoxa1	29.607	KO Input 1	21.765	29.5505	21.8375	7.713	0.00476602	0.476602	0.390869	0.0432313
KO H2A 1	Hoxa1	29.494	KO Input 1	21.91
KO H2A 2	Hoxa1	30.213	KO Input 2	21.603	30.098	21.8905	8.2075	0.00338296	0.338296
KO H2A 2	Hoxa1	29.983	KO Input 2	22.178
KO H2A 3	Hoxa1	30.739	KO Input 3	22.699	30.577	22.45	8.127	0.00357708	0.357708
KO H2A 3	Hoxa1	30.415	KO Input 3	22.201
Wt IgG 1	Hoxa3	32.718	Wt Input 1	18.235	33.1135	19.5295	13.584	8.14345e-05	0.00814345	0.0136778	0.00443237
Wt IgG 1	Hoxa3	33.509	Wt Input 1	20.824
Wt IgG 2	Hoxa3	33.108	Wt Input 2	19.87	33.02	19.7955	13.2245	0.000104479	0.0104479
Wt IgG 2	Hoxa3	32.932	Wt Input 2	19.721
Wt IgG 3	Hoxa3	32.816	Wt Input 3	21.133	32.6835	20.562	12.1215	0.000224422	0.0224422
Wt IgG 3	Hoxa3	32.551	Wt Input 3	19.991
Wt Cbx2 1	Hoxa3	29.017	Wt Input 1	18.235	28.936	19.5295	9.4065	0.00147354	0.147354	0.345555	0.132909
Wt Cbx2 1	Hoxa3	28.855	Wt Input 1	20.824
Wt Cbx2 2	Hoxa3	29.056	Wt Input 2	19.87	28.219	19.7955	8.4235	0.00291255	0.291255
Wt Cbx2 2	Hoxa3	27.382	Wt Input 2	19.721
Wt Cbx2 3	Hoxa3	28.683	Wt Input 3	21.133	27.9475	20.562	7.3855	0.00598057	0.598057
Wt Cbx2 3	Hoxa3	27.212	Wt Input 3	19.991
Wt Ring1b 1	Hoxa3	29.664	Wt Input 1	18.235	31.3735	19.5295	11.844	0.00027202	0.027202	0.0764924	0.0320342
Wt Ring1b 1	Hoxa3	33.083	Wt Input 1	20.824
Wt Ring1b 2	Hoxa3	29.381	Wt Input 2	19.87	30.3675	19.7955	10.572	0.000656918	0.0656918
Wt Ring1b 2	Hoxa3	31.354	Wt Input 2	19.721
Wt Ring1b 3	Hoxa3	30.349	Wt Input 3	21.133	30.078	20.562	9.516	0.00136584	0.136584
Wt Ring1b 3	Hoxa3	29.807	Wt Input 3	19.991
Wt H2A 1	Hoxa3	24.383	Wt Input 1	18.235	24.3645	19.5295	4.835	0.0350364	3.50364	4.68208	0.661262
Wt H2A 1	Hoxa3	24.346	Wt Input 1	20.824
Wt H2A 2	Hoxa3	23.873	Wt Input 2	19.87	24.191	19.7955	4.3955	0.0475141	4.75141
Wt H2A 2	Hoxa3	24.509	Wt Input 2	19.721
Wt H2A 3	Hoxa3	25.141	Wt Input 3	21.133	24.672	20.562	4.11	0.0579117	5.79117
Wt H2A 3	Hoxa3	24.203	Wt Input 3	19.991
KO IgG 1	Hoxa3	40	KO Input 1	23.728	37.8315	23.698	14.1335	5.56407e-05	0.00556407	0.029788	0.0121949
KO IgG 1	Hoxa3	35.663	KO Input 1	23.668
KO IgG 2	Hoxa3	33.81	KO Input 2	23.259	34.7915	23.4835	11.308	0.000394415	0.0394415
KO IgG 2	Hoxa3	35.773	KO Input 2	23.708
KO IgG 3	Hoxa3	35.412	KO Input 3	23.813	34.868	23.7295	11.1385	0.000443585	0.0443585
KO IgG 3	Hoxa3	34.324	KO Input 3	23.646
KO Cbx2 1	Hoxa3	33.878	KO Input 1	23.728	33.7755	23.698	10.0775	0.000925487	0.0925487	0.111862	0.0437235
KO Cbx2 1	Hoxa3	33.673	KO Input 1	23.668
KO Cbx2 2	Hoxa3	34.058	KO Input 2	23.259	34.5185	23.4835	11.035	0.000476578	0.0476578
KO Cbx2 2	Hoxa3	34.979	KO Input 2	23.708
KO Cbx2 3	Hoxa3	32.621	KO Input 3	23.813	32.729	23.7295	8.9995	0.0019538	0.19538
KO Cbx2 3	Hoxa3	32.837	KO Input 3	23.646
KO Ring1b 1	Hoxa3	34.181	KO Input 1	23.728	34.0045	23.698	10.3065	0.00078965	0.078965	0.0825303	0.00495705
KO Ring1b 1	Hoxa3	33.828	KO Input 1	23.668
KO Ring1b 2	Hoxa3	33.66	KO Input 2	23.259	33.5645	23.4835	10.081	0.000923244	0.0923244
KO Ring1b 2	Hoxa3	33.469	KO Input 2	23.708
KO Ring1b 3	Hoxa3	33.971	KO Input 3	23.813	34.0855	23.7295	10.356	0.000763015	0.0763015
KO Ring1b 3	Hoxa3	34.2	KO Input 3	23.646
KO H2A 1	Hoxa3	29.076	KO Input 1	23.728	28.7705	23.698	5.0725	0.0297184	2.97184	2.49136	0.245245
KO H2A 1	Hoxa3	28.465	KO Input 1	23.668
KO H2A 2	Hoxa3	28.789	KO Input 2	23.259	29.0125	23.4835	5.529	0.0216574	2.16574
KO H2A 2	Hoxa3	29.236	KO Input 2	23.708
KO H2A 3	Hoxa3	29.284	KO Input 3	23.813	29.149	23.7295	5.4195	0.0233651	2.33651
KO H2A 3	Hoxa3	29.014	KO Input 3	23.646
Wt IgG 1	Hoxd3	35.642	Wt Input 1	25.16	36.839	24.8545	11.9845	0.000246778	0.0246778	0.0203904	0.00221153
Wt IgG 1	Hoxd3	38.036	Wt Input 1	24.549
Wt IgG 2	Hoxd3	40	Wt Input 2	24.785	37.2825	24.786	12.4965	0.000173053	0.0173053
Wt IgG 2	Hoxd3	34.565	Wt Input 2	24.787
Wt IgG 3	Hoxd3	33.764	Wt Input 3	24.15	36.882	24.5345	12.3475	0.000191881	0.0191881
Wt IgG 3	Hoxd3	40	Wt Input 3	24.919
Wt Cbx2 1	Hoxd3	31.483	Wt Input 1	25.16	31.396	24.8545	6.5415	0.0107353	1.07353	0.962511	0.0764942
Wt Cbx2 1	Hoxd3	31.309	Wt Input 1	24.549
Wt Cbx2 2	Hoxd3	32.737	Wt Input 2	24.785	31.7235	24.786	6.9375	0.00815839	0.815839
Wt Cbx2 2	Hoxd3	30.71	Wt Input 2	24.787
Wt Cbx2 3	Hoxd3	30.815	Wt Input 3	24.15	31.181	24.5345	6.6465	0.00998169	0.998169
Wt Cbx2 3	Hoxd3	31.547	Wt Input 3	24.919
Wt Ring1b 1	Hoxd3	33.797	Wt Input 1	25.16	33.5925	24.8545	8.738	0.00234207	0.234207	0.203921	0.0157583
Wt Ring1b 1	Hoxd3	33.388	Wt Input 1	24.549
Wt Ring1b 2	Hoxd3	34.229	Wt Input 2	24.785	33.894	24.786	9.108	0.00181225	0.181225
Wt Ring1b 2	Hoxd3	33.559	Wt Input 2	24.787
Wt Ring1b 3	Hoxd3	33.178	Wt Input 3	24.15	33.527	24.5345	8.9925	0.0019633	0.19633
Wt Ring1b 3	Hoxd3	33.876	Wt Input 3	24.919
Wt H2A 1	Hoxd3	28.535	Wt Input 1	25.16	28.458	24.8545	3.6035	0.0822694	8.22694	9.68332	0.728253
Wt H2A 1	Hoxd3	28.381	Wt Input 1	24.549
Wt H2A 2	Hoxd3	27.969	Wt Input 2	24.785	28.052	24.786	3.266	0.103953	10.3953
Wt H2A 2	Hoxd3	28.135	Wt Input 2	24.787
Wt H2A 3	Hoxd3	27.522	Wt Input 3	24.15	27.796	24.5345	3.2615	0.104278	10.4278
Wt H2A 3	Hoxd3	28.07	Wt Input 3	24.919
KO IgG 1	Hoxd3	40	KO Input 1	24.737	40	24.3905	15.6095	2.00019e-05	0.00200019	0.00484097	0.00144302
KO IgG 1	Hoxd3	40	KO Input 1	24.044
KO IgG 2	Hoxd3	36.036	KO Input 2	23.98	38.018	23.9495	14.0685	5.82049e-05	0.00582049
KO IgG 2	Hoxd3	40	KO Input 2	23.919
KO IgG 3	Hoxd3	40	KO Input 3	24.211	38.026	24.161	13.865	6.70223e-05	0.00670223
KO IgG 3	Hoxd3	36.052	KO Input 3	24.111
KO Cbx2 1	Hoxd3	35.277	KO Input 1	24.737	35.5225	24.3905	11.132	0.000445588	0.0445588	0.0724053	0.0164235
KO Cbx2 1	Hoxd3	35.768	KO Input 1	24.044
KO Cbx2 2	Hoxd3	34.061	KO Input 2	23.98	34.4045	23.9495	10.455	0.000712412	0.0712412
KO Cbx2 2	Hoxd3	34.748	KO Input 2	23.919
KO Cbx2 3	Hoxd3	34.597	KO Input 3	24.211	34.1065	24.161	9.9455	0.00101416	0.101416
KO Cbx2 3	Hoxd3	33.616	KO Input 3	24.111
KO Ring1b 1	Hoxd3	34.561	KO Input 1	24.737	34.1385	24.3905	9.748	0.00116295	0.116295	0.0896945	0.0166161
KO Ring1b 1	Hoxd3	33.716	KO Input 1	24.044
KO Ring1b 2	Hoxd3	34.037	KO Input 2	23.98	34.01	23.9495	10.0605	0.000936457	0.0936457
KO Ring1b 2	Hoxd3	33.983	KO Input 2	23.919
KO Ring1b 3	Hoxd3	34.478	KO Input 3	24.211	34.8845	24.161	10.7235	0.000591432	0.0591432
KO Ring1b 3	Hoxd3	35.291	KO Input 3	24.111
KO H2A 1	Hoxd3	29.613	KO Input 1	24.737	29.3625	24.3905	4.972	0.0318624	3.18624	2.69644	0.250931
KO H2A 1	Hoxd3	29.112	KO Input 1	24.044
KO H2A 2	Hoxd3	29.496	KO Input 2	23.98	29.245	23.9495	5.2955	0.0254622	2.54622
KO H2A 2	Hoxd3	28.994	KO Input 2	23.919
KO H2A 3	Hoxd3	29.838	KO Input 3	24.211	29.568	24.161	5.407	0.0235684	2.35684
KO H2A 3	Hoxd3	29.298	KO Input 3	24.111
Wt IgG 1	Hoxa11	34.769	Wt Input 1	22.899	36.437	22.896	13.541	8.38982e-05	0.00838982	0.0398181	0.0201748
Wt IgG 1	Hoxa11	38.105	Wt Input 1	22.893
Wt IgG 2	Hoxa11	34.675	Wt Input 2	22.23	33.898	22.3595	11.5385	0.000336175	0.0336175
Wt IgG 2	Hoxa11	33.121	Wt Input 2	22.489
Wt IgG 3	Hoxa11	33.188	Wt Input 3	22.4	33.2695	22.935	10.3345	0.000774471	0.0774471
Wt IgG 3	Hoxa11	33.351	Wt Input 3	23.47
Wt Cbx2 1	Hoxa11	30.011	Wt Input 1	22.899	29.9495	22.896	7.0535	0.00752809	0.752809	0.57344	0.0935015
Wt Cbx2 1	Hoxa11	29.888	Wt Input 1	22.893
Wt Cbx2 2	Hoxa11	30.241	Wt Input 2	22.23	30.1945	22.3595	7.835	0.00437955	0.437955
Wt Cbx2 2	Hoxa11	30.148	Wt Input 2	22.489
Wt Cbx2 3	Hoxa11	30.462	Wt Input 3	22.4	30.496	22.935	7.561	0.00529556	0.529556
Wt Cbx2 3	Hoxa11	30.53	Wt Input 3	23.47
Wt Ring1b 1	Hoxa11	32.147	Wt Input 1	22.899	32.0015	22.896	9.1055	0.0018154	0.18154	0.195114	0.0491704
Wt Ring1b 1	Hoxa11	31.856	Wt Input 1	22.893
Wt Ring1b 2	Hoxa11	32.852	Wt Input 2	22.23	32.092	22.3595	9.7325	0.00117551	0.117551
Wt Ring1b 2	Hoxa11	31.332	Wt Input 2	22.489
Wt Ring1b 3	Hoxa11	31.539	Wt Input 3	22.4	31.3835	22.935	8.4485	0.00286252	0.286252
Wt Ring1b 3	Hoxa11	31.228	Wt Input 3	23.47
Wt H2A 1	Hoxa11	26.678	Wt Input 1	22.899	26.4015	22.896	3.5055	0.088052	8.8052	7.4503	0.732284
Wt H2A 1	Hoxa11	26.125	Wt Input 1	22.893
Wt H2A 2	Hoxa11	26.272	Wt Input 2	22.23	26.35	22.3595	3.9905	0.0629129	6.29129
Wt H2A 2	Hoxa11	26.428	Wt Input 2	22.489
Wt H2A 3	Hoxa11	25.858	Wt Input 3	22.4	26.72	22.935	3.785	0.072544	7.2544
Wt H2A 3	Hoxa11	27.582	Wt Input 3	23.47
KO IgG 1	Hoxa11	34.405	KO Input 1	22.452	34.251	22.6	11.651	0.000310956	0.0310956	0.0364972	0.0137184
KO IgG 1	Hoxa11	34.097	KO Input 1	22.748
KO IgG 2	Hoxa11	33.251	KO Input 2	21.507	34.2085	21.59	12.6185	0.00015902	0.015902
KO IgG 2	Hoxa11	35.166	KO Input 2	21.673
KO IgG 3	Hoxa11	32.774	KO Input 3	22.065	33.03	22.386	10.644	0.000624939	0.0624939
KO IgG 3	Hoxa11	33.286	KO Input 3	22.707
KO Cbx2 1	Hoxa11	32.566	KO Input 1	22.452	31.798	22.6	9.198	0.00170265	0.170265	0.154033	0.0388592
KO Cbx2 1	Hoxa11	31.03	KO Input 1	22.748
KO Cbx2 2	Hoxa11	30.551	KO Input 2	21.507	30.4735	21.59	8.8835	0.00211739	0.211739
KO Cbx2 2	Hoxa11	30.396	KO Input 2	21.673
KO Cbx2 3	Hoxa11	32.087	KO Input 3	22.065	32.672	22.386	10.286	0.00080095	0.080095
KO Cbx2 3	Hoxa11	33.257	KO Input 3	22.707
KO Ring1b 1	Hoxa11	32.777	KO Input 1	22.452	32.667	22.6	10.067	0.000932247	0.0932247	0.0843829	0.0209387
KO Ring1b 1	Hoxa11	32.557	KO Input 1	22.748
KO Ring1b 2	Hoxa11	33.628	KO Input 2	21.507	32.7235	21.59	11.1335	0.000445126	0.0445126
KO Ring1b 2	Hoxa11	31.819	KO Input 2	21.673
KO Ring1b 3	Hoxa11	32.805	KO Input 3	22.065	32.145	22.386	9.759	0.00115411	0.115411
KO Ring1b 3	Hoxa11	31.485	KO Input 3	22.707
KO H2A 1	Hoxa11	27.282	KO Input 1	22.452	27.019	22.6	4.419	0.0467464	4.67464	3.68146	0.530091
KO H2A 1	Hoxa11	26.756	KO Input 1	22.748
KO H2A 2	Hoxa11	26.519	KO Input 2	21.507	26.716	21.59	5.126	0.0286365	2.86365
KO H2A 2	Hoxa11	26.913	KO Input 2	21.673
KO H2A 3	Hoxa11	26.776	KO Input 3	22.065	27.22	22.386	4.834	0.0350608	3.50608
KO H2A 3	Hoxa11	27.664	KO Input 3	22.707
Wt IgG 1	Hoxc13	35.104	Wt Input 1	24.27	35.155	24.172	10.983	0.000494069	0.0494069	0.0201386	0.0146342
Wt IgG 1	Hoxc13	35.206	Wt Input 1	24.074
Wt IgG 2	Hoxc13	36.574	Wt Input 2	24.215	38.287	24.114	14.173	5.41379e-05	0.00541379
Wt IgG 2	Hoxc13	40	Wt Input 2	24.013
Wt IgG 3	Hoxc13	36.536	Wt Input 3	24.234	38.268	24.1425	14.1255	5.59501e-05	0.00559501
Wt IgG 3	Hoxc13	40	Wt Input 3	24.051
Wt Cbx2 1	Hoxc13	31.87	Wt Input 1	24.27	31.916	24.172	7.744	0.0046647	0.46647	0.435088	0.024361
Wt Cbx2 1	Hoxc13	31.962	Wt Input 1	24.074
Wt Cbx2 2	Hoxc13	31.988	Wt Input 2	24.215	32.127	24.114	8.013	0.00387121	0.387121
Wt Cbx2 2	Hoxc13	32.266	Wt Input 2	24.013
Wt Cbx2 3	Hoxc13	31.646	Wt Input 3	24.234	31.933	24.1425	7.7905	0.00451675	0.451675
Wt Cbx2 3	Hoxc13	32.22	Wt Input 3	24.051
Wt Ring1b 1	Hoxc13	34.257	Wt Input 1	24.27	34.134	24.172	9.962	0.00100263	0.100263	0.115701	0.00849776
Wt Ring1b 1	Hoxc13	34.011	Wt Input 1	24.074
Wt Ring1b 2	Hoxc13	33.699	Wt Input 2	24.215	33.706	24.114	9.592	0.00129575	0.129575
Wt Ring1b 2	Hoxc13	33.713	Wt Input 2	24.013
Wt Ring1b 3	Hoxc13	33.775	Wt Input 3	24.234	33.8785	24.1425	9.736	0.00117266	0.117266
Wt Ring1b 3	Hoxc13	33.982	Wt Input 3	24.051
Wt H2A 1	Hoxc13	27.771	Wt Input 1	24.27	27.9815	24.172	3.8095	0.0713225	7.13225	5.16462	1.01664
Wt H2A 1	Hoxc13	28.192	Wt Input 1	24.074
Wt H2A 2	Hoxc13	28.97	Wt Input 2	24.215	28.856	24.114	4.742	0.0373694	3.73694
Wt H2A 2	Hoxc13	28.742	Wt Input 2	24.013
Wt H2A 3	Hoxc13	28.637	Wt Input 3	24.234	28.577	24.1425	4.4345	0.0462469	4.62469
Wt H2A 3	Hoxc13	28.517	Wt Input 3	24.051
KO IgG 1	Hoxc13	36.377	KO Input 1	22.969	35.644	22.943	12.701	0.000150182	0.0150182	0.0149343	0.00485794
KO IgG 1	Hoxc13	34.911	KO Input 1	22.917
KO IgG 2	Hoxc13	33.887	KO Input 2	22.952	36.9435	23.0295	13.914	6.47841e-05	0.00647841
KO IgG 2	Hoxc13	40	KO Input 2	23.107
KO IgG 3	Hoxc13	34.562	KO Input 3	22.91	35	22.933	12.067	0.000233062	0.0233062
KO IgG 3	Hoxc13	35.438	KO Input 3	22.956
KO Cbx2 1	Hoxc13	34.553	KO Input 1	22.969	34.297	22.943	11.354	0.000382037	0.0382037	0.0369581	0.00398941
KO Cbx2 1	Hoxc13	34.041	KO Input 1	22.917
KO Cbx2 2	Hoxc13	34.225	KO Input 2	22.952	34.756	23.0295	11.7265	0.000295102	0.0295102
KO Cbx2 2	Hoxc13	35.287	KO Input 2	23.107
KO Cbx2 3	Hoxc13	34.892	KO Input 3	22.91	34.111	22.933	11.178	0.000431605	0.0431605
KO Cbx2 3	Hoxc13	33.33	KO Input 3	22.956
KO Ring1b 1	Hoxc13	34.043	KO Input 1	22.969	34.0405	22.943	11.0975	0.000456373	0.0456373	0.0396156	0.0060217
KO Ring1b 1	Hoxc13	34.038	KO Input 1	22.917
KO Ring1b 2	Hoxc13	34.647	KO Input 2	22.952	34.854	23.0295	11.8245	0.000275722	0.0275722
KO Ring1b 2	Hoxc13	35.061	KO Input 2	23.107
KO Ring1b 3	Hoxc13	33.719	KO Input 3	22.91	34.0305	22.933	11.0975	0.000456372	0.0456372
KO Ring1b 3	Hoxc13	34.342	KO Input 3	22.956
KO H2A 1	Hoxc13	29.477	KO Input 1	22.969	29.019	22.943	6.076	0.0148232	1.48232	1.50694	0.0125492
KO H2A 1	Hoxc13	28.561	KO Input 1	22.917
KO H2A 2	Hoxc13	29.095	KO Input 2	22.952	29.074	23.0295	6.0445	0.0151504	1.51504
KO H2A 2	Hoxc13	29.053	KO Input 2	23.107
KO H2A 3	Hoxc13	29.022	KO Input 3	22.91	28.9695	22.933	6.0365	0.0152346	1.52346
KO H2A 3	Hoxc13	28.917	KO Input 3	22.956
Wt IgG 1	Hoxd12	35.937	Wt Input 1	25.038	35.911	24.6725	11.2385	0.00041388	0.041388	0.0425125	0.00390492
Wt IgG 1	Hoxd12	35.885	Wt Input 1	24.307
Wt IgG 2	Hoxd12	34.755	Wt Input 2	24.35	35.07	24.0975	10.9725	0.000497678	0.0497678
Wt IgG 2	Hoxd12	35.385	Wt Input 2	23.845
Wt IgG 3	Hoxd12	35.746	Wt Input 3	24.295	35.656	24.2315	11.4245	0.000363817	0.0363817
Wt IgG 3	Hoxd12	35.566	Wt Input 3	24.168
Wt Cbx2 1	Hoxd12	30.738	Wt Input 1	25.038	31.396	24.6725	6.7235	0.0094629	0.94629	0.724192	0.136185
Wt Cbx2 1	Hoxd12	32.054	Wt Input 1	24.307
Wt Cbx2 2	Hoxd12	32.354	Wt Input 2	24.35	31.8105	24.0975	7.713	0.00476602	0.476602
Wt Cbx2 2	Hoxd12	31.267	Wt Input 2	23.845
Wt Cbx2 3	Hoxd12	30.843	Wt Input 3	24.295	31.291	24.2315	7.0595	0.00749685	0.749685
Wt Cbx2 3	Hoxd12	31.739	Wt Input 3	24.168
Wt Ring1b 1	Hoxd12	32.899	Wt Input 1	25.038	32.867	24.6725	8.1945	0.00341358	0.341358	0.266316	0.0544196
Wt Ring1b 1	Hoxd12	32.835	Wt Input 1	24.307
Wt Ring1b 2	Hoxd12	32	Wt Input 2	24.35	32.4925	24.0975	8.395	0.00297066	0.297066
Wt Ring1b 2	Hoxd12	32.985	Wt Input 2	23.845
Wt Ring1b 3	Hoxd12	34.15	Wt Input 3	24.295	33.5145	24.2315	9.283	0.00160523	0.160523
Wt Ring1b 3	Hoxd12	32.879	Wt Input 3	24.168
Wt H2A 1	Hoxd12	29.383	Wt Input 1	25.038	29.2485	24.6725	4.576	0.0419263	4.19263	3.50198	0.34891
Wt H2A 1	Hoxd12	29.114	Wt Input 1	24.307
Wt H2A 2	Hoxd12	29.197	Wt Input 2	24.35	29.123	24.0975	5.0255	0.0307025	3.07025
Wt H2A 2	Hoxd12	29.049	Wt Input 2	23.845
Wt H2A 3	Hoxd12	29.493	Wt Input 3	24.295	29.178	24.2315	4.9465	0.0324306	3.24306
Wt H2A 3	Hoxd12	28.863	Wt Input 3	24.168
KO IgG 1	Hoxd12	35.597	KO Input 1	24.026	35.2575	23.321	11.9365	0.000255126	0.0255126	0.0226922	0.00175144
KO IgG 1	Hoxd12	34.918	KO Input 1	22.616
KO IgG 2	Hoxd12	34.975	KO Input 2	22.452	34.9105	22.8295	12.081	0.000230811	0.0230811
KO IgG 2	Hoxd12	34.846	KO Input 2	23.207
KO IgG 3	Hoxd12	35.259	KO Input 3	23.161	35.505	23.1795	12.3255	0.00019483	0.019483
KO IgG 3	Hoxd12	35.751	KO Input 3	23.198
KO Cbx2 1	Hoxd12	32.01	KO Input 1	24.026	32.016	23.321	8.695	0.00241293	0.241293	0.155834	0.0427376
KO Cbx2 1	Hoxd12	32.022	KO Input 1	22.616
KO Cbx2 2	Hoxd12	32.228	KO Input 2	22.452	32.636	22.8295	9.8065	0.00111673	0.111673
KO Cbx2 2	Hoxd12	33.044	KO Input 2	23.207
KO Cbx2 3	Hoxd12	33.487	KO Input 3	23.161	32.9495	23.1795	9.77	0.00114535	0.114535
KO Cbx2 3	Hoxd12	32.412	KO Input 3	23.198
KO Ring1b 1	Hoxd12	34.64	KO Input 1	24.026	33.43	23.321	10.109	0.000905498	0.0905498	0.0831876	0.00526331
KO Ring1b 1	Hoxd12	32.22	KO Input 1	22.616
KO Ring1b 2	Hoxd12	33.45	KO Input 2	22.452	33.2495	22.8295	10.42	0.000729907	0.0729907
KO Ring1b 2	Hoxd12	33.049	KO Input 2	23.207
KO Ring1b 3	Hoxd12	32.726	KO Input 3	23.161	33.3625	23.1795	10.183	0.000860223	0.0860223
KO Ring1b 3	Hoxd12	33.999	KO Input 3	23.198
KO H2A 1	Hoxd12	28.835	KO Input 1	24.026	28.7445	23.321	5.4235	0.0233004	2.33004	2.21863	0.459163
KO H2A 1	Hoxd12	28.654	KO Input 1	22.616
KO H2A 2	Hoxd12	29.004	KO Input 2	22.452	29.0155	22.8295	6.186	0.013735	1.3735
KO H2A 2	Hoxd12	29.027	KO Input 2	23.207
KO H2A 3	Hoxd12	28.234	KO Input 3	23.161	28.2615	23.1795	5.082	0.0295233	2.95233
KO H2A 3	Hoxd12	28.289	KO Input 3	23.198
