# Supplementary material for: Lin28a/let-7 pathway modulates the Hox code via Polycomb regulation during axial patterning in vertebrates
Source: eLife. 2020 May 29;9:e53608. doi: 10.7554/eLife.53608 (PMC7259951; doi:10.7554/eLife.53608)
Supplement: Figure 5—source data 1. [file elife-53608-fig5-data1.xlsx]

## Sheet: OSN qPCR
Sample Name	Target Name	CT	Target Name	CT	Ave(Oct)	Ave(b-actin)	dCt	ddCt			relative expression	Ave(relative)	SE	p-value
Wt1	41551	21.51	b-actin	20.25	21.41	20.115	1.295	0	1	0.844224	1.18452	1	0.0943966
Wt1	41551	21.31	b-actin	19.98
Wt2	41551	21.91	b-actin	20.35	21.93	20.195	1.735	0.44	0.737135		0.873151
Wt2	41551	21.95	b-actin	20.04
Wt3	41551	21.94	b-actin	20.35	21.91	20.285	1.625	0.33	0.795536		0.942329
Wt3	41551	21.88	b-actin	20.22
KO1	41551	21.54	b-actin	19.76	21.5	19.7	1.8	0.505	0.70466		0.834684	0.968088	0.0668301	0.796281
KO1	41551	21.46	b-actin	19.64
KO2	41551	21.51	b-actin	20	21.505	20.005	1.5	0.205	0.867539		1.02762
KO2	41551	21.5	b-actin	20.01
KO3	41551	22.4	b-actin	20.88	22.425	20.945	1.48	0.185	0.879649		1.04196
KO3	41551	22.45	b-actin	21.01
Sample Name	Target Name	CT	Target Name	CT	Ave(Nanog)	Ave(b-actin)	dCt	ddCt			relative expression	Ave(relative)	SE	p-value
Wt1	Nanog	23.47	b-actin	20.25	23.51	20.115	3.395	0	1	0.73449	1.36149	1	0.188831
Wt1	Nanog	23.55	b-actin	19.98
Wt2	Nanog	24.18	b-actin	20.35	24.165	20.195	3.97	0.575	0.671286		0.913948
Wt2	Nanog	24.15	b-actin	20.04
Wt3	Nanog	24.58	b-actin	20.35	24.59	20.285	4.305	0.91	0.532185		0.724564
Wt3	Nanog	24.6	b-actin	20.22
KO1	Nanog	23.6	b-actin	19.76	23.635	19.7	3.935	0.54	0.687771		0.936392	0.766855	0.143584	0.381341
KO1	Nanog	23.67	b-actin	19.64
KO2	Nanog	23.99	b-actin	20	24.025	20.005	4.02	0.625	0.64842		0.882816
KO2	Nanog	24.06	b-actin	20.01
KO3	Nanog	25.99	b-actin	20.88	25.84	20.945	4.895	1.5	0.353553		0.481359
KO3	Nanog	25.69	b-actin	21.01
Sample Name	Target Name	CT	Target Name	CT	Ave(Sox2)	Ave(b-actin)	dCt	ddCt			relative expression	Ave(relative)	SE	p-value
Wt1	Sox2	24.37	b-actin	20.25	24.225	20.115	4.11	0	1	0.881553	1.13436	1	0.0928481
Wt1	Sox2	24.08	b-actin	19.98
Wt2	Sox2	24.43	b-actin	20.35	24.425	20.195	4.23	0.12	0.920188		1.04383
Wt2	Sox2	24.42	b-actin	20.04
Wt3	Sox2	24.81	b-actin	20.35	24.86	20.285	4.575	0.465	0.724471		0.821812
Wt3	Sox2	24.91	b-actin	20.22
KO1	Sox2	24.05	b-actin	19.76	24.085	19.7	4.385	0.275	0.82645		0.937494	0.864808	0.0647998	0.298439
KO1	Sox2	24.12	b-actin	19.64
KO2	Sox2	24.47	b-actin	20	24.415	20.005	4.41	0.3	0.812252		0.921388
KO2	Sox2	24.36	b-actin	20.01
KO3	Sox2	25.71	b-actin	20.88	25.68	20.945	4.735	0.625	0.64842		0.735543
KO3	Sox2	25.65	b-actin	21.01

## Sheet: let-7 qPCR
Sample Name	Target Name	Ct(SDM)	Target Name	Ct(SDM)
Wt1	let-7a	30.59	U6	29.81	30.6	29.705	0.895	0	1	1.08339	0.923032	1	11.219	0.0891341
Wt1	let-7a	30.61	U6	29.6
Wt2	let-7a	30.4	U6	30.31	30.55	30.1	0.45	-0.445	1.36131		1.25654
Wt2	let-7a	30.7	U6	29.89
Wt3	let-7a	30.34	U6	29.13	30.385	29.32	1.065	0.17	0.888843		0.820431
Wt3	let-7a	30.43	U6	29.51
KO1	let-7a	28.72	U6	31.05	28.48	31.285	-2.805	-3.7	12.996		11.9958	6.5205		0.581199
KO1	let-7a	28.24	U6	31.52
KO2	let-7a	28.61	U6	30.07	28.825	30.105	-1.28	-2.175	4.51586		4.16828
KO2	let-7a	29.04	U6	30.14
KO3	let-7a	28.93	U6	30.29	29.08	30.065	-0.985	-1.88	3.68075		3.39745
KO3	let-7a	29.23	U6	29.84
Wt1	let-7b	30.4	U6	29.81	30.35	29.705	0.645	-0.25	1.18921		1.09768	1.53127		0.136488
Wt1	let-7b	30.3	U6	29.6
Wt2	let-7b	29.67	U6	30.31	29.785	30.1	-0.315	-1.21	2.31338		2.13532
Wt2	let-7b	29.9	U6	29.89
Wt3	let-7b	29.66	U6	29.13	29.655	29.32	0.335	-0.56	1.47427		1.3608
Wt3	let-7b	29.65	U6	29.51
KO1	let-7b	30.54	U6	31.05	30.545	31.285	-0.74	-1.635	3.10588		2.86682	2.74433		0.244614
KO1	let-7b	30.55	U6	31.52
KO2	let-7b	30.47	U6	30.07	30.335	30.105	0.23	-0.665	1.58557		1.46353
KO2	let-7b	30.2	U6	30.14
KO3	let-7b	28.97	U6	30.29	28.88	30.065	-1.185	-2.08	4.22807		3.90265
KO3	let-7b	28.79	U6	29.84
Wt1	let-7c	31.62	U6	29.81	31.555	29.705	1.85	0.955	0.515842	1.05204	0.476138	0.971064		0.086555
Wt1	let-7c	31.49	U6	29.6
Wt2	let-7c	30.44	U6	30.31	30.24	30.1	0.14	-0.755	1.68763		1.55774
Wt2	let-7c	30.04	U6	29.89
Wt3	let-7c	30.68	U6	29.13	30.285	29.32	0.965	0.07	0.952638		0.879316
Wt3	let-7c	29.89	U6	29.51
KO1	let-7c	31.88	U6	31.05	31.65	31.285	0.365	-0.53	1.44393		1.33279	1.41677		0.126283
KO1	let-7c	31.42	U6	31.52
KO2	let-7c	31.12	U6	30.07	31.075	30.105	0.97	0.075	0.949342		0.876274
KO2	let-7c	31.03	U6	30.14
KO3	let-7c	29.72	U6	30.29	29.815	30.065	-0.25	-1.145	2.21146		2.04125
KO3	let-7c	29.91	U6	29.84
Wt1	let-7d	31.28	U6	29.81	31.06	29.705	1.355	0.46	0.726986	0.895587	0.671032	0.826656		0.0736833
Wt1	let-7d	30.84	U6	29.6
Wt2	let-7d	30.8	U6	30.31	30.705	30.1	0.605	-0.29	1.22264		1.12854
Wt2	let-7d	30.61	U6	29.89
Wt3	let-7d	30.59	U6	29.13	30.655	29.32	1.335	0.44	0.737135		0.680399
Wt3	let-7d	30.72	U6	29.51
KO1	let-7d	28.37	U6	31.05	28.385	31.285	-2.9	-3.795	13.8806		12.8123	8.17332		0.728522
KO1	let-7d	28.4	U6	31.52
KO2	let-7d	27.95	U6	30.07	27.97	30.105	-2.135	-3.03	8.1681		7.53942
KO2	let-7d	27.99	U6	30.14
KO3	let-7d	28.77	U6	30.29	28.785	30.065	-1.28	-2.175	4.51586		4.16828
KO3	let-7d	28.8	U6	29.84
Wt1	let-7e	29.35	U6	29.81	29.315	29.705	-0.39	-1.285	2.43682	3.25602	2.24926	3.00541		0.267885
Wt1	let-7e	29.28	U6	29.6
Wt2	let-7e	28.82	U6	30.31	28.905	30.1	-1.195	-2.09	4.25748		3.92979
Wt2	let-7e	28.99	U6	29.89
Wt3	let-7e	28.68	U6	29.13	28.595	29.32	-0.725	-1.62	3.07375		2.83717
Wt3	let-7e	28.51	U6	29.51
KO1	let-7e	27.01	U6	31.05	26.965	31.285	-4.32	-5.215	37.1425		34.2838	20.7864		1.85278
KO1	let-7e	26.92	U6	31.52
KO2	let-7e	27.11	U6	30.07	26.94	30.105	-3.165	-4.06	16.6795		15.3957
KO2	let-7e	26.77	U6	30.14
KO3	let-7e	27.4	U6	30.29	27.18	30.065	-2.885	-3.78	13.737		12.6797
KO3	let-7e	26.96	U6	29.84
Wt1	let-7f	33.15	U6	29.81	33.3	29.705	3.595	2.7	0.153893	0.182837	0.142048	0.168765		0.0150427
Wt1	let-7f	33.45	U6	29.6
Wt2	let-7f	33.8	U6	30.31	33.885	30.1	3.785	2.89	0.134904		0.12452
Wt2	let-7f	33.97	U6	29.89
Wt3	let-7f	32.32	U6	29.13	32.16	29.32	2.84	1.945	0.259715		0.239725
Wt3	let-7f	32	U6	29.51
KO1	let-7f	30.01	U6	31.05	29.965	31.285	-1.32	-2.215	4.64282		4.28547	2.9356		0.261662
KO1	let-7f	29.92	U6	31.52
KO2	let-7f	29.31	U6	30.07	29.22	30.105	-0.885	-1.78	3.43426		3.16993
KO2	let-7f	29.13	U6	30.14
KO3	let-7f	30.47	U6	30.29	30.41	30.065	0.345	-0.55	1.46409		1.3514
KO3	let-7f	30.35	U6	29.84
Wt1	let-7g	32.27	U6	29.81	31.705	29.705	2	1.105	0.464902	0.869497	0.42912	0.802573		0.0715367
Wt1	let-7g	31.14	U6	29.6
Wt2	let-7g	30.72	U6	30.31	30.755	30.1	0.655	-0.24	1.18099		1.09009
Wt2	let-7g	30.79	U6	29.89
Wt3	let-7g	30.17	U6	29.13	30.27	29.32	0.95	0.055	0.962594		0.888506
Wt3	let-7g	30.37	U6	29.51
KO1	let-7g	28.24	U6	31.05	28.105	31.285	-3.18	-4.075	16.8538		15.5566	10.3748		0.924752
KO1	let-7g	27.97	U6	31.52
KO2	let-7g	27.78	U6	30.07	27.675	30.105	-2.43	-3.325	10.0213		9.25
KO2	let-7g	27.57	U6	30.14
KO3	let-7g	28.14	U6	30.29	28.185	30.065	-1.88	-2.775	6.84476		6.31794
KO3	let-7g	28.23	U6	29.84
Wt1	let-7i	29.84	U6	29.81	29.81	29.705	0.105	-0.79	1.72907	3.09148	1.59599	2.85354		0.254347
Wt1	let-7i	29.78	U6	29.6
Wt2	let-7i	29.13	U6	30.31	28.695	30.1	-1.405	-2.3	4.92458		4.54554
Wt2	let-7i	28.26	U6	29.89
Wt3	let-7i	28.81	U6	29.13	28.825	29.32	-0.495	-1.39	2.62079		2.41907
Wt3	let-7i	28.84	U6	29.51
KO1	let-7i	28.53	U6	31.05	28.395	31.285	-2.89	-3.785	13.7847		12.7238	8.79372		0.783821
KO1	let-7i	28.26	U6	31.52
KO2	let-7i	28.47	U6	30.07	28.405	30.105	-1.7	-2.595	6.04189		5.57686
KO2	let-7i	28.34	U6	30.14
KO3	let-7i	27.74	U6	30.29	27.83	30.065	-2.235	-3.13	8.75435		8.08055
KO3	let-7i	27.92	U6	29.84
Wt1	mir-98	34.89	U6	29.81	34.985	29.705	5.28	4.385	0.0478612	0.0647626	0.0441774	0.059778		0.00532826
Wt1	mir-98	35.08	U6	29.6
Wt2	mir-98	34.86	U6	30.31	34.48	30.1	4.38	3.485	0.0893121		0.082438
Wt2	mir-98	34.1	U6	29.89
Wt3	mir-98	34.55	U6	29.13	34.345	29.32	5.025	4.13	0.0571145		0.0527185
Wt3	mir-98	34.14	U6	29.51
KO1	mir-98	31.2	U6	31.05	31.39	31.285	0.105	-0.79	1.72907		1.59599	1.36289		0.12148
KO1	mir-98	31.58	U6	31.52
KO2	mir-98	29.87	U6	30.07	30.04	30.105	-0.065	-0.96	1.94531		1.79558
KO2	mir-98	30.21	U6	30.14
KO3	mir-98	31.34	U6	30.29	31.365	30.065	1.3	0.405	0.755236		0.697108
KO3	mir-98	31.39	U6	29.84

## Sheet: Hox qPCR
Sample Name	Target Name	CT	Target Name	CT	Ave(Hox)	Ave(b-actin)	dCt	ddCt			relative expression	Ave(relative)	SE
Wt day0-1	Hoxa11	30.907	b-actin	17.598	30.6895	16.9675	13.722	0	1	1.07991	0.926002	1	0.105871
Wt day0-1	Hoxa11	30.472	b-actin	16.337
Wt day0-2	Hoxa11	30.768	b-actin	17.158	30.854	17.5165	13.3375	-0.384501	1.30541		1.20881
Wt day0-2	Hoxa11	30.94	b-actin	17.875
Wt day0-3	Hoxa11	31.297	b-actin	17.046	31.013	17.193	13.82	0.0980005	0.934327		0.865188
Wt day0-3	Hoxa11	30.729	b-actin	17.34
Wt day3-1	Hoxa11	31.149	b-actin	16.903	31.281	16.7375	14.5435	0.8215	0.565853		0.523981	0.482483	0.0214413
Wt day3-1	Hoxa11	31.413	b-actin	16.572
Wt day3-2	Hoxa11	31.442	b-actin	16.134	31.2585	16.5615	14.697	0.974999	0.50874		0.471094
Wt day3-2	Hoxa11	31.075	b-actin	16.989
Wt day3-3	Hoxa11	30.833	b-actin	16.725	31.4085	16.653	14.7555	1.0335	0.488524		0.452374
Wt day3-3	Hoxa11	31.984	b-actin	16.581
Wt day6-1	Hoxa11	27.261	b-actin	14.438	27.3075	14.602	12.7055	-1.0165	2.02301		1.87331	1.3053	0.284065
Wt day6-1	Hoxa11	27.354	b-actin	14.766
Wt day6-2	Hoxa11	28.344	b-actin	15.215	28.088	14.522	13.566	-0.156	1.11419		1.03175
Wt day6-2	Hoxa11	27.832	b-actin	13.829
Wt day6-3	Hoxa11	26.71	b-actin	13.994	26.7215	13.126	13.5955	-0.126501	1.09164		1.01086
Wt day6-3	Hoxa11	26.733	b-actin	12.258
Wt day9-1	Hoxa11	24.734	b-actin	15.679	24.8105	16.227	8.5835	-5.1385	35.2243		32.6178	27.4329	3.353
Wt day9-1	Hoxa11	24.887	b-actin	16.775
Wt day9-2	Hoxa11	25.111	b-actin	15.692	24.977	15.769	9.208	-4.514	22.8481		21.1573
Wt day9-2	Hoxa11	24.843	b-actin	15.846
Wt day9-3	Hoxa11	24.101	b-actin	15.597	24.199	15.422	8.777	-4.945	30.803		28.5236
Wt day9-3	Hoxa11	24.297	b-actin	15.247
Wt day12-1	Hoxa11	23.471	b-actin	15.078	23.4985	15.2665	8.232	-5.49	44.9422		41.6166	48.7272	7.93044
Wt day12-1	Hoxa11	23.526	b-actin	15.455
Wt day12-2	Hoxa11	24.38	b-actin	15.808	24.3345	16.0455	8.289	-5.433	43.2012		40.0044
Wt day12-2	Hoxa11	24.289	b-actin	16.283
Wt day12-3	Hoxa11	23.058	b-actin	15.406	23.207	15.6085	7.5985	-6.1235	69.7199		64.5608
Wt day12-3	Hoxa11	23.356	b-actin	15.811
KO day3-1	Hoxa11	28.033	b-actin	19.14	28.1895	19.0405	9.149	-4.573	23.8018		22.0405	16.5299	2.85418
KO day3-1	Hoxa11	28.346	b-actin	18.941
KO day3-2	Hoxa11	28.535	b-actin	18.345	28.3675	18.3985	9.969	-3.753	13.4823		12.4847
KO day3-2	Hoxa11	28.2	b-actin	18.452
KO day3-3	Hoxa11	27.561	b-actin	18.183	27.7755	18.0775	9.698	-4.024	16.2684		15.0646
KO day3-3	Hoxa11	27.99	b-actin	17.972
KO day6-1	Hoxa11	27.155	b-actin	16.65	27.349	17.155	10.194	-3.528	11.5354		10.6818	15.5101	2.94696
KO day6-1	Hoxa11	27.543	b-actin	17.66
KO day6-2	Hoxa11	27.505	b-actin	18.284	27.8965	18.192	9.7045	-4.0175	16.1953		14.9969
KO day6-2	Hoxa11	28.288	b-actin	18.1
KO day6-3	Hoxa11	27.152	b-actin	17.894	27.066	17.837	9.229	-4.493	22.5179		20.8516
KO day6-3	Hoxa11	26.98	b-actin	17.78
KO day9-1	Hoxa11	25.232	b-actin	17.423	25.191	17.911	7.28	-6.442	86.9431		80.5095	71.3968	11.7202
KO day9-1	Hoxa11	25.15	b-actin	18.399
KO day9-2	Hoxa11	25.202	b-actin	17.947	25.2575	18.065	7.1925	-6.5295	92.3795		85.5436
KO day9-2	Hoxa11	25.313	b-actin	18.183
KO day9-3	Hoxa11	25.118	b-actin	17.171	25.33	17.308	8.022	-5.7	51.9841		48.1374
KO day9-3	Hoxa11	25.542	b-actin	17.445
KO day12-1	Hoxa11	25.322	b-actin	18.278	25.5325	18.129	7.4035	-6.3185	79.8101		73.9043	82.3045	11.2735
KO day12-1	Hoxa11	25.743	b-actin	17.98
KO day12-2	Hoxa11	24.508	b-actin	17.879	24.934	18.032	6.902	-6.82	112.986		104.625
KO day12-2	Hoxa11	25.36	b-actin	18.185
KO day12-3	Hoxa11	25.282	b-actin	17.808	25.4125	17.897	7.5155	-6.2065	73.8487		68.384
KO day12-3	Hoxa11	25.543	b-actin	17.986

## Sheet: let-7 qPCR let-7KD
Sample Name	Target Name	Ct(CP)	Target Name	Ct(CP)
Wt	let-7a	32.19	RNU6B	31.15	32.16	31.56	0.6	0	1	0.177318
Wt	let-7a	32.13	RNU6B	31.97
Wt	let-7b	33.46	RNU6B	31.15	33.59	31.56	2.03	1.43	0.371131	0.0658081
Wt	let-7b	33.72	RNU6B	31.97
Wt	let-7c	34.35	RNU6B	31.15	34.275	31.56	2.715	2.115	0.230846	0.040933
Wt	let-7c	34.2	RNU6B	31.97
Wt	let-7d	33.34	RNU6B	31.15	33.295	31.56	1.735	1.135	0.455335	0.080739
Wt	let-7d	33.25	RNU6B	31.97
Wt	let-7e	31.26	RNU6B	31.15	31.14	31.56	-0.42	-1.02	2.02792	0.359586
Wt	let-7e	31.02	RNU6B	31.97
Wt	let-7f	34.17	RNU6B	31.15	33.955	31.56	2.395	1.795	0.288172	0.051098
Wt	let-7f	33.74	RNU6B	31.97
Wt	let-7g	32.29	RNU6B	31.15	32.42	31.56	0.86	0.26	0.835088	0.148076
Wt	let-7g	32.55	RNU6B	31.97
Wt	let-7i	33.59	RNU6B	31.15	33.57	31.56	2.01	1.41	0.376312	0.0667268
Wt	let-7i	33.55	RNU6B	31.97
Wt	mir-98	36.53	RNU6B	31.15	36.35	31.56	4.79	4.19	0.0547879	0.00971487
Wt	mir-98	36.17	RNU6B	31.97
Lin28a KO	let-7a	29.32	RNU6B	31.89	29.515	31.93	-2.415	-3.015	8.08361	1.43337
Lin28a KO	let-7a	29.71	RNU6B	31.97
Lin28a KO	let-7b	32.63	RNU6B	31.89	32.73	31.93	0.8	0.2	0.870551	0.154364
Lin28a KO	let-7b	32.83	RNU6B	31.97
Lin28a KO	let-7c	34.03	RNU6B	31.89	33.82	31.93	1.89	1.29	0.408951	0.0725143
Lin28a KO	let-7c	33.61	RNU6B	31.97
Lin28a KO	let-7d	30.58	RNU6B	31.89	30.48	31.93	-1.45	-2.05	4.14106	0.734284
Lin28a KO	let-7d	30.38	RNU6B	31.97
Lin28a KO	let-7e	28.95	RNU6B	31.89	28.835	31.93	-3.095	-3.695	12.9511	2.29646
Lin28a KO	let-7e	28.72	RNU6B	31.97
Lin28a KO	let-7f	30.96	RNU6B	31.89	31.145	31.93	-0.785	-1.385	2.61172	0.463105
Lin28a KO	let-7f	31.33	RNU6B	31.97
Lin28a KO	let-7g	29.85	RNU6B	31.89	29.72	31.93	-2.21	-2.81	7.01285	1.2435
Lin28a KO	let-7g	29.59	RNU6B	31.97
Lin28a KO	let-7i	31.01	RNU6B	31.89	30.995	31.93	-0.935	-1.535	2.89788	0.513847
Lin28a KO	let-7i	30.98	RNU6B	31.97
Lin28a KO	mir-98	32.6	RNU6B	31.89	32.56	31.93	0.63	0.03	0.97942	0.173669
Lin28a KO	mir-98	32.52	RNU6B	31.97
Lin28a KO, let-7 KD	let-7a	36.65	RNU6B	33.14	36.885	32.89	3.995	3.395	0.0950612	0.016856
Lin28a KO, let-7 KD	let-7a	37.12	RNU6B	32.64
Lin28a KO, let-7 KD	let-7b	36.46	RNU6B	33.14	36.85	32.89	3.96	3.36	0.0973956	0.01727
Lin28a KO, let-7 KD	let-7b	37.24	RNU6B	32.64
Lin28a KO, let-7 KD	let-7c	40	RNU6B	33.14	40	32.89	7.11	6.51	0.0109722	0.00194557
Lin28a KO, let-7 KD	let-7c	40	RNU6B	32.64
Lin28a KO, let-7 KD	let-7d	36.7	RNU6B	33.14	36.59	32.89	3.7	3.1	0.116629	0.0206804
Lin28a KO, let-7 KD	let-7d	36.48	RNU6B	32.64
Lin28a KO, let-7 KD	let-7e	35.12	RNU6B	33.14	35.425	32.89	2.535	1.935	0.261521	0.0463724
Lin28a KO, let-7 KD	let-7e	35.73	RNU6B	32.64
Lin28a KO, let-7 KD	let-7f	36.5	RNU6B	33.14	36.315	32.89	3.425	2.825	0.141121	0.0250232
Lin28a KO, let-7 KD	let-7f	36.13	RNU6B	32.64
Lin28a KO, let-7 KD	let-7g	37.71	RNU6B	33.14	37.785	32.89	4.895	4.295	0.050942	0.00903293
Lin28a KO, let-7 KD	let-7g	37.86	RNU6B	32.64
Lin28a KO, let-7 KD	let-7i	31.94	RNU6B	33.14	31.925	32.89	-0.965	-1.565	2.95878	0.524644
Lin28a KO, let-7 KD	let-7i	31.91	RNU6B	32.64
Lin28a KO, let-7 KD	mir-98	36.54	RNU6B	33.14	36.255	32.89	3.365	2.765	0.147113	0.0260858
Lin28a KO, let-7 KD	mir-98	35.97	RNU6B	32.64

## Sheet: Hox qPCR let-7KD Cbx2UTRmut
Sample Name	Target Name	Ct(SDM)	Target Name	Ct(SDM)	Ave(Hoxd12)	Ave(b-actin)	dCt	ddCt			relative expression	Ave(relative)	SE	p-value
Wt 1	Hoxd12	28.42	b-actin	17.21	28.44	17.185	11.255	0	1	0.941079	1.06261	1	0.0901713
Wt 1	Hoxd12	28.46	b-actin	17.16
Wt 2	Hoxd12	28.49	b-actin	17.13	28.385	17.1	11.285	0.03	0.97942		1.04074
Wt 2	Hoxd12	28.28	b-actin	17.07
Wt 3	Hoxd12	28.49	b-actin	16.99	28.455	16.955	11.5	0.245	0.843816		0.896647
Wt 3	Hoxd12	28.42	b-actin	16.92
KO 1	Hoxd12	27.92	b-actin	18.24	27.83	18.19	9.64	-1.615	3.06312		3.2549	3.1843	0.263107	0.000169107
KO 1	Hoxd12	27.74	b-actin	18.14
KO 2	Hoxd12	27.93	b-actin	18.13	27.935	18.125	9.81	-1.445	2.72263		2.89309
KO 2	Hoxd12	27.94	b-actin	18.12
KO 3	Hoxd12	27.83	b-actin	18.22	27.83	18.255	9.575	-1.68	3.20428		3.4049
KO 3	Hoxd12	27.83	b-actin	18.29
let-7KD 1	Hoxd12	27.38	b-actin	18.44	27.295	18.405	8.89	-0.005	1.00347		1.0663	1.10586	0.0606037	0.000220832
let-7KD 1	Hoxd12	27.21	b-actin	18.37
let-7KD 2	Hoxd12	27.38	b-actin	18.34	27.32	18.375	8.945	0.05	0.965936		1.02641
let-7KD 2	Hoxd12	27.26	b-actin	18.41
let-7KD 3	Hoxd12	27.14	b-actin	18.43	27.18	18.49	8.69	-0.205	1.15269		1.22486
let-7KD 3	Hoxd12	27.22	b-actin	18.55
Cbx2 UTR 1	Hoxd12	28.98	b-actin	18.19	28.975	18.23	10.745	-0.51	1.42405		1.51321	1.44897	0.057549	0.000366951
Cbx2 UTR 1	Hoxd12	28.97	b-actin	18.27
Cbx2 UTR 2	Hoxd12	28.97	b-actin	18.17	29.05	18.195	10.855	-0.4	1.31951		1.40212
Cbx2 UTR 2	Hoxd12	29.13	b-actin	18.22
Cbx2 UTR 3	Hoxd12	29.09	b-actin	18.08	28.945	18.12	10.825	-0.43	1.34723		1.43158
Cbx2 UTR 3	Hoxd12	28.8	b-actin	18.16
Sample Name	Target Name	Ct(SDM)	Target Name	Ct(SDM)	Ave(Hoxd11)	Ave(b-actin)	dCt	ddCt			relative expression	Ave(relative)	SE	p-value
Wt 1	Hoxa11	26.33	b-actin	17.64	26.295	17.68	8.615	0	1	0.960224	1.06261	1.02034	0.0319623
Wt 1	Hoxa11	26.26	b-actin	17.72
Wt 2	Hoxa11	26.19	b-actin	17.62	26.215	17.57	8.645	0.03	0.97942		1.04074
Wt 2	Hoxa11	26.24	b-actin	17.52
Wt 3	Hoxa11	26.17	b-actin	17.45	26.205	17.44	8.765	0.15	0.90125		0.957678
Wt 3	Hoxa11	26.24	b-actin	17.43
KO 1	Hoxa11	26.17	b-actin	18.92	26.065	18.915	7.15	-1.465	2.76063		2.93348	2.8216	0.0562143	9.8815e-06
KO 1	Hoxa11	25.96	b-actin	18.91
KO 2	Hoxa11	26.03	b-actin	18.89	26.115	18.885	7.23	-1.385	2.61172		2.77524
KO 2	Hoxa11	26.2	b-actin	18.88
KO 3	Hoxa11	26.07	b-actin	18.81	26.06	18.82	7.24	-1.375	2.59368		2.75607
KO 3	Hoxa11	26.05	b-actin	18.83
let-7KD 1	Hoxa11	27.13	b-actin	19.1	27.21	19.105	8.105	-0.51	1.42405		1.51321	1.46467	0.0434213	4.42417e-05
let-7KD 1	Hoxa11	27.29	b-actin	19.11
let-7KD 2	Hoxa11	27.26	b-actin	19.2	27.255	19.14	8.115	-0.5	1.41421		1.50276
let-7KD 2	Hoxa11	27.25	b-actin	19.08
let-7KD 3	Hoxa11	27.18	b-actin	19.01	27.25	19.01	8.24	-0.375	1.29684		1.37804
let-7KD 3	Hoxa11	27.32	b-actin	19.01
Cbx2 UTR 1	Hoxa11	28.15	b-actin	18.7	28.175	18.725	9.45	0.835	0.560583		0.595681	0.667041	0.114109	7.12366e-05
Cbx2 UTR 1	Hoxa11	28.2	b-actin	18.75
Cbx2 UTR 2	Hoxa11	28.29	b-actin	18.68	28.285	18.625	9.66	1.045	0.484645		0.514989
Cbx2 UTR 2	Hoxa11	28.28	b-actin	18.57
Cbx2 UTR 3	Hoxa11	27.57	b-actin	18.69	27.475	18.605	8.87	0.255	0.837987		0.890454
Cbx2 UTR 3	Hoxa11	27.38	b-actin	18.52
